# Supplementary material for: In silico prediction of chemical aquatic toxicity for marine crustaceans via machine learning
Source: Royal Society of Chemistry journal article supplement (doi:10.1039/c8tx00331a), 2019-01-01
Supplement: c8tx00331a1.pdf [file c8tx00331a1.pdf]

## Supplemental data :

### ***In silico* prediction of chemical aquatic toxicity for marine crustaceans via machine learning**

Lin Liu, Hongbin Yang, Yingchun Cai, Qianqian Cao, Lixia Sun, Zhuang Wang,

Weihua Li, Guixia Liu, Philip W. Lee and Yun Tang\*

#### **Content :**

- **Table S1:** The CAS numbers of chemicals and their acute concentration values on the original saltwater crustacean datasets.
- **Table S2:** The detailed descriptors used in model building.
- **Table S3:** The performance of all descriptor-based classification local models.
- **Table S4:** The top ten fingerprint-based local models.
- **Table S5:** The performance of all descriptor-based classification global models.
- **Table S6:** The top ten fingerprint-based global models.
- **Table S7:** The detailed description of ID and OD chemicals in the test set.
