# Supplementary material for: In silico prediction of chemical aquatic toxicity for marine crustaceans via machine learning
Source: Royal Society of Chemistry journal article supplement (doi:10.1039/c8tx00331a), 2019-01-01
Supplement: c8tx00331a2.xlsx [file c8tx00331a2.xlsx]

## Sheet: Mysidae1075
CASRN	Experimental Values	Unit	Test Time	Unit	Aquatic Environment	Endpoint	Data set
76188642	300	ug/L	96	h	SW	LC50	Mysidae
76188642	110	ug/L	96	h	SW	LC50	Mysidae
143500	10	ug/L	96	h	SW	LC50	Mysidae
21609905	3.16	ug/L	96	h	SW	LC50	Mysidae
2104645	3.44	ug/L	96	h	SW	LC50	Mysidae
35367385	2.1	ug/L	96	h	SW	LC50	Mysidae
35367385	2.06	ug/L	96	h	SW	LC50	Mysidae
10108642	15.5	ug/L	96	h	SW	LC50	Mysidae
143500	10.1	ug/L	96	h	SW	LC50	Mysidae
10108642	1.38	ug/L	96	h	SW	LC50	Mysidae
10108642	2.43	ug/L	96	h	SW	LC50	Mysidae
10108642	2.05	ug/L	96	h	SW	LC50	Mysidae
10108642	10.3	ug/L	96	h	SW	LC50	Mysidae
10108642	3.9	ug/L	96	h	SW	LC50	Mysidae
10108642	34.4	ug/L	96	h	SW	LC50	Mysidae
10108642	5.3	ug/L	96	h	SW	LC50	Mysidae
7718549	151.7	ug/L	96	h	SW	LC50	Mysidae
7718549	634	ug/L	96	h	SW	LC50	Mysidae
7440439	24.38	ug/L	96	h	SW	LC50	Mysidae
39403844	150000	ug/L	96	h	SW	LC50	Mysidae
12774300	4500000	ug/L	96	h	SW	LC50	Mysidae
7681529	162	ug/L	96	h	SW	LC50	Mysidae
34364426	9400	ug/L	96	h	SW	LC50	Mysidae
66594329	700	ug/L	96	h	SW	LC50	Mysidae
66594318	270	ug/L	96	h	SW	LC50	Mysidae
7440439	20.03	ug/L	96	h	SW	LC50	Mysidae
38638050	20000	ug/L	96	h	SW	LC50	Mysidae
7447394	16	ug/L	96	h	SW	LC50	Mysidae
10108642	8	ug/L	96	h	SW	LC50	Mysidae
12774300	34.24	ml/L	96	h	SW	LC50	Mysidae
12774300	41.93	ml/L	96	h	SW	LC50	Mysidae
12774300	49.97	ml/L	96	h	SW	LC50	Mysidae
7440439	21.68	ug/L	96	h	SW	LC50	Mysidae
7440439	23.54	ug/L	96	h	SW	LC50	Mysidae
122467327	322000	ug/L	96	h	SW	LC50	Mysidae
55389	0.15	ug/L	96	h	SW	LC50	Mysidae
117817	1000	ug/L	96	h	SW	LC50	Mysidae
7440439	17.93	ug/L	96	h	SW	LC50	Mysidae
7440439	19.32	ug/L	96	h	SW	LC50	Mysidae
2212671	9910	ug/L	96	h	SW	LC50	Mysidae
2212671	8300	ug/L	96	h	SW	LC50	Mysidae
28249776	304	ug/L	96	h	SW	LC50	Mysidae
7646857	260	ug/L	96	h	SW	LC50	Mysidae
85687	900	ug/L	96	h	SW	LC50	Mysidae
298000	0.78	ug/L	96	h	SW	LC50	Mysidae
12774300	34.24	ml/L	96	h	SW	LC50	Mysidae
12774300	41.93	ml/L	96	h	SW	LC50	Mysidae
12774300	49.97	ml/L	96	h	SW	LC50	Mysidae
298000	0.21	ug/L	96	h	SW	LC50	Mysidae
298000	0.2	ug/L	96	h	SW	LC50	Mysidae
1461229	1.1	ug/L	96	h	SW	LC50	Mysidae
1461229	2	ug/L	96	h	SW	LC50	Mysidae
1461229	2.2	ug/L	96	h	SW	LC50	Mysidae
79947	860	ug/L	96	h	SW	LC50	Mysidae
79947	1100	ug/L	96	h	SW	LC50	Mysidae
79947	1200	ug/L	96	h	SW	LC50	Mysidae
121755	3	ug/L	96	h	SW	LC50	Mysidae
7487947	3.5	ug/L	96	h	SW	LC50	Mysidae
91203	1280	ug/L	96	h	SW	LC50	Mysidae
91203	850	ug/L	96	h	SW	LC50	Mysidae
121755	3.1	ug/L	96	h	SW	LC50	Mysidae
121755	2.6	ug/L	96	h	SW	LC50	Mysidae
10108642	110	ug/L	96	h	SW	LC50	Mysidae
10108642	110	ug/L	96	h	SW	LC50	Mysidae
70124775	0.008	ug/L	96	h	SW	LC50	Mysidae
28249776	330	ug/L	96	h	SW	LC50	Mysidae
2921882	0.035	ug/L	96	h	SW	LC50	Mysidae
51630581	0.008	ug/L	96	h	SW	LC50	Mysidae
52645531	0.02	ug/L	96	h	SW	LC50	Mysidae
151213	5700	ug/L	96	h	SW	LC50	Mysidae
151213	8800	ug/L	96	h	SW	LC50	Mysidae
151213	6100	ug/L	96	h	SW	LC50	Mysidae
151213	7100	ug/L	96	h	SW	LC50	Mysidae
10108642	36	ug/L	96	h	SW	LC50	Mysidae
10108642	20	ug/L	96	h	SW	LC50	Mysidae
10108642	17	ug/L	96	h	SW	LC50	Mysidae
10108642	29	ug/L	96	h	SW	LC50	Mysidae
16752775	34	ug/L	96	h	SW	LC50	Mysidae
16752775	30	ug/L	96	h	SW	LC50	Mysidae
16752775	50	ug/L	96	h	SW	LC50	Mysidae
16752775	64	ug/L	96	h	SW	LC50	Mysidae
7778509	10000	ug/L	96	h	SW	LC50	Mysidae
7778509	18000	ug/L	96	h	SW	LC50	Mysidae
7778509	13000	ug/L	96	h	SW	LC50	Mysidae
7778509	22000	ug/L	96	h	SW	LC50	Mysidae
7778509	13000	ug/L	96	h	SW	LC50	Mysidae
58899	6.28	ug/L	96	h	SW	LC50	Mysidae
80057	1100	ug/L	96	h	SW	LC50	Mysidae
7778509	8000	ug/L	96	h	SW	LC50	Mysidae
7778509	14000	ug/L	96	h	SW	LC50	Mysidae
7778509	11000	ug/L	96	h	SW	LC50	Mysidae
7778509	22000	ug/L	96	h	SW	LC50	Mysidae
7775113	0.00013	mol/L	4	d	SW	LC50	Mysidae
7775113	0.00011	mol/L	4	d	SW	LC50	Mysidae
2921882	0.056	ug/L	96	h	SW	LC50	Mysidae
7440439	47	ug/L	96	h	SW	LC50	Mysidae
7440439	73	ug/L	96	h	SW	LC50	Mysidae
7440439	85	ug/L	96	h	SW	LC50	Mysidae
7440439	15.5	ug/L	96	h	SW	LC50	Mysidae
7440439	20.5	ug/L	96	h	SW	LC50	Mysidae
7440439	28	ug/L	96	h	SW	LC50	Mysidae
7440439	30.9	ug/L	96	h	SW	LC50	Mysidae
7440439	82	ug/L	96	h	SW	LC50	Mysidae
7440439	20.7	ug/L	96	h	SW	LC50	Mysidae
7440439	32.8	ug/L	96	h	SW	LC50	Mysidae
7440439	11.1	ug/L	96	h	SW	LC50	Mysidae
7440439	11.1	ug/L	96	h	SW	LC50	Mysidae
139139	1480000	ug/L	96	h	SW	LC50	Mysidae
139139	961000	ug/L	96	h	SW	LC50	Mysidae
139139	464000	ug/L	96	h	SW	LC50	Mysidae
60617063	163400	ug/L	96	h	SW	LC50	Mysidae
60617063	136400	ug/L	96	h	SW	LC50	Mysidae
60617063	120400	ug/L	96	h	SW	LC50	Mysidae
7789006	2500	ug/L	96	h	SW	LC50	Mysidae
7789006	2700	ug/L	96	h	SW	LC50	Mysidae
7758896	17	ug/L	96	h	SW	LC50	Mysidae
7733020	138	ug/L	96	h	SW	LC50	Mysidae
7733020	87	ug/L	96	h	SW	LC50	Mysidae
7733020	81	ug/L	96	h	SW	LC50	Mysidae
7733020	212	ug/L	96	h	SW	LC50	Mysidae
7733020	151	ug/L	96	h	SW	LC50	Mysidae
7733020	88	ug/L	96	h	SW	LC50	Mysidae
7733020	89	ug/L	96	h	SW	LC50	Mysidae
7733020	320	ug/L	96	h	SW	LC50	Mysidae
70896081	123200	ug/L	96	h	SW	LC50	Mysidae
7440393	500000	ug/L	96	h	SW	LC50	Mysidae
79925	1360	ug/L	96	h	SW	LC50	Mysidae
99876	4400	ug/L	96	h	SW	LC50	Mysidae
124185	500000	ug/L	96	h	SW	LC50	Mysidae
132649	1310	ug/L	96	h	SW	LC50	Mysidae
111422	207000	ug/L	96	h	SW	LC50	Mysidae
142961	171000	ug/L	96	h	SW	LC50	Mysidae
101848	710	ug/L	96	h	SW	LC50	Mysidae
629970	500000	ug/L	96	h	SW	LC50	Mysidae
7681494	23300	ug/L	96	h	SW	LC50	Mysidae
78933	402000	ug/L	96	h	SW	LC50	Mysidae
100425	12100	ug/L	96	h	SW	LC50	Mysidae
59669260	263	ug/L	96	h	SW	LC50	Mysidae
8065369	1	ug/L	96	h	SW	LC50	Mysidae
28249776	370	ug/L	96	h	SW	LC50	Mysidae
52645531	0.046	ug/L	96	h	SW	LC50	Mysidae
51630581	0.021	ug/L	96	h	SW	LC50	Mysidae
7718549	508	ug/L	96	h	SW	LC50	Mysidae
7718549	151.7	ug/L	96	h	SW	LC50	Mysidae
7718549	634	ug/L	96	h	SW	LC50	Mysidae
151213	2200	ug/L	96	h	SW	LC50	Mysidae
151213	2300	ug/L	96	h	SW	LC50	Mysidae
151213	2300	ug/L	96	h	SW	LC50	Mysidae
7733020	350	ug/L	96	h	SW	LC50	Mysidae
7733020	340	ug/L	96	h	SW	LC50	Mysidae
7733020	370	ug/L	96	h	SW	LC50	Mysidae
7733020	360	ug/L	96	h	SW	LC50	Mysidae
7733020	380	ug/L	96	h	SW	LC50	Mysidae
7733020	350	ug/L	96	h	SW	LC50	Mysidae
1912249	1000	ug/L	96	h	SW	LC50	Mysidae
7646857	520.8	ug/L	96	h	SW	LC50	Mysidae
7646857	547.2	ug/L	96	h	SW	LC50	Mysidae
7646857	591.3	ug/L	96	h	SW	LC50	Mysidae
7440382	2319	ug/L	96	h	SW	LC50	Mysidae
7761888	141	ug/L	96	h	SW	LC50	Mysidae
7761888	300	ug/L	96	h	SW	LC50	Mysidae
7761888	300	ug/L	96	h	SW	LC50	Mysidae
7761888	64	ug/L	96	h	SW	LC50	Mysidae
7761888	298	ug/L	96	h	SW	LC50	Mysidae
115297	1.3	ug/L	96	h	SW	LC50	Mysidae
115297	1.05	ug/L	96	h	SW	LC50	Mysidae
115297	5	ug/L	96	h	SW	LC50	Mysidae
115297	4.6	ug/L	96	h	SW	LC50	Mysidae
115297	1.14	ug/L	96	h	SW	LC50	Mysidae
100414	2600	ug/L	96	h	SW	LC50	Mysidae
52645531	0.095	ug/L	96	h	SW	LC50	Mysidae
10108642	19.6	ug/L	96	h	SW	LC50	Mysidae
7447394	153	ug/L	96	h	SW	LC50	Mysidae
7646857	303	ug/L	96	h	SW	LC50	Mysidae
333415	8.5	ug/L	96	h	SW	LC50	Mysidae
55389	0.56	ug/L	96	h	SW	LC50	Mysidae
121755	11	ug/L	96	h	SW	LC50	Mysidae
52315078	0.027	ug/L	96	h	SW	LC50	Mysidae
51630581	0.032	ug/L	96	h	SW	LC50	Mysidae
7440439	32.11	ug/L	96	h	SW	LC50	Mysidae
7440439	32.64	ug/L	96	h	SW	LC50	Mysidae
7681529	73	ug/L	96	h	SW	LC50	Mysidae
7681529	267	ug/L	96	h	SW	LC50	Mysidae
7681529	249	ug/L	96	h	SW	LC50	Mysidae
7681529	268	ug/L	96	h	SW	LC50	Mysidae
7681529	222	ug/L	96	h	SW	LC50	Mysidae
60617063	7060	ug/L	96	h	SW	LC50	Mysidae
60617063	7260	ug/L	96	h	SW	LC50	Mysidae
60617063	4260	ug/L	96	h	SW	LC50	Mysidae
151508	123.6	ppb	96	h	SW	LC50	Mysidae
151508	93.2	ppb	96	h	SW	LC50	Mysidae
7440439	30.73	ug/L	96	h	SW	LC50	Mysidae
7440439	33.8	ug/L	96	h	SW	LC50	Mysidae
7440439	31.74	ug/L	96	h	SW	LC50	Mysidae
7440439	31.96	ug/L	96	h	SW	LC50	Mysidae
35367385	1.97	ug/L	96	h	SW	LC50	Mysidae
8001352	2.67	ug/L	96	h	SW	LC50	Mysidae
1582098	136.4	ug/L	96	h	SW	LC50	Mysidae
63252	7.7	ug/L	96	h	SW	LC50	Mysidae
298022	0.33	ug/L	96	h	SW	LC50	Mysidae
298000	0.77	ug/L	96	h	SW	LC50	Mysidae
21609905	3.31	ug/L	96	h	SW	LC50	Mysidae
143500	10.29	ug/L	96	h	SW	LC50	Mysidae
333415	4.82	ug/L	96	h	SW	LC50	Mysidae
78488	4.55	ug/L	96	h	SW	LC50	Mysidae
2104645	3.01	ug/L	96	h	SW	LC50	Mysidae
86500	0.811	ug/L	96	h	SW	LC50	Mysidae
172306853	184300	ug/L	96	h	SW	LC50	Mysidae
172306853	175700	ug/L	96	h	SW	LC50	Mysidae
172306853	162100	ug/L	96	h	SW	LC50	Mysidae
10108642	39.5	ug/L	96	h	SW	LC50	Mysidae
10108642	112	ug/L	96	h	SW	LC50	Mysidae
53469219	17	ug/L	96	h	SW	LC50	Mysidae
11097691	57	ug/L	96	h	SW	LC50	Mysidae
7757826	1920	ug/L	96	h	SW	LC50	Mysidae
12125029	16800	ug/L	96	h	SW	LC50	Mysidae
7789006	6590	ug/L	96	h	SW	LC50	Mysidae
108952	12500	ug/L	96	h	SW	LC50	Mysidae
88857	320	ug/L	96	h	SW	LC50	Mysidae
88857	170	ug/L	96	h	SW	LC50	Mysidae
23184669	320	ug/L	96	h	SW	LC50	Mysidae
23184669	230	ug/L	96	h	SW	LC50	Mysidae
1313275	123000	ug/L	96	h	SW	LC50	Mysidae
1313275	180000	ug/L	96	h	SW	LC50	Mysidae
145733	150000	ug/L	96	h	SW	LC50	Mysidae
145733	354900	ug/L	96	h	SW	LC50	Mysidae
93721	31600	ug/L	96	h	SW	LC50	Mysidae
93721	27900	ug/L	96	h	SW	LC50	Mysidae
98011	10570	ug/L	96	h	SW	LC50	Mysidae
110861	232380	ug/L	96	h	SW	LC50	Mysidae
75070	27360	ug/L	96	h	SW	LC50	Mysidae
79061	29910	ug/L	96	h	SW	LC50	Mysidae
107131	5810	ug/L	96	h	SW	LC50	Mysidae
7705080	90400	ug/L	96	h	SW	LC50	Mysidae
76062	30	ug/L	96	h	SW	LC50	Mysidae
76062	257.8	ug/L	96	h	SW	LC50	Mysidae
93765	20000	ug/L	96	h	SW	LC50	Mysidae
93765	42000	ug/L	96	h	SW	LC50	Mysidae
13517118	92	ug/L	96	h	SW	LC50	Mysidae
13517118	367	ug/L	96	h	SW	LC50	Mysidae
7681529	62	ug/L	96	h	SW	LC50	Mysidae
7681529	210	ug/L	96	h	SW	LC50	Mysidae
7447394	18	ug/L	96	h	SW	LC50	Mysidae
56359	2	ug/L	4	d	SW	LC50	Mysidae
60617063	27.1	ug/L	96	h	SW	LC50	Mysidae
83329	0.25	mg/L	96	h	SW	LC50	Mysidae
83329	0.67	mg/L	4	d	SW	LC50	Mysidae
7761888	249.3	ug/L	96	h	SW	LC50	Mysidae
7783008	1500	ug/L	96	h	SW	LC50	Mysidae
7439921	3130	ug/L	96	h	SW	LC50	Mysidae
7440473	2030	ug/L	96	h	SW	LC50	Mysidae
7440382	1740	ug/L	96	h	SW	LC50	Mysidae
7440020	508	ug/L	96	h	SW	LC50	Mysidae
7440666	499	ug/L	96	h	SW	LC50	Mysidae
7440224	249	ug/L	96	h	SW	LC50	Mysidae
7440508	181	ug/L	96	h	SW	LC50	Mysidae
57125	113	ug/L	96	h	SW	LC50	Mysidae
7440439	110	ug/L	96	h	SW	LC50	Mysidae
7439976	3.5	ug/L	96	h	SW	LC50	Mysidae
7733020	62.8	ug/L	96	h	SW	LC50	Mysidae
7733020	80.7	ug/L	96	h	SW	LC50	Mysidae
7733020	88.4	ug/L	96	h	SW	LC50	Mysidae
7733020	73.2	ug/L	96	h	SW	LC50	Mysidae
7733020	70.2	ug/L	96	h	SW	LC50	Mysidae
7733020	93.6	ug/L	96	h	SW	LC50	Mysidae
7733020	78.8	ug/L	96	h	SW	LC50	Mysidae
7733020	88.4	ug/L	96	h	SW	LC50	Mysidae
105679	1600	ug/L	96	h	SW	LC50	Mysidae
7447394	27.2	ug/L	96	h	SW	LC50	Mysidae
108952	1490	ug/L	96	h	SW	LC50	Mysidae
108952	2710	ug/L	96	h	SW	LC50	Mysidae
108952	4530	ug/L	96	h	SW	LC50	Mysidae
108952	260	ug/L	96	h	SW	LC50	Mysidae
108952	560	ug/L	96	h	SW	LC50	Mysidae
108952	710	ug/L	96	h	SW	LC50	Mysidae
39362293	158000	ug/L	96	h	SW	LC50	Mysidae
39362293	245400	ug/L	96	h	SW	LC50	Mysidae
39362293	223700	ug/L	96	h	SW	LC50	Mysidae
84852153	60.6	ug/L	96	h	SW	LC50	Mysidae
206440	22	ug/L	96	h	SW	LC50	Mysidae
206440	1.4	ug/L	96	h	SW	LC50	Mysidae
206440	31	ug/L	96	h	SW	LC50	Mysidae
206440	58	ug/L	96	h	SW	LC50	Mysidae
206440	12	ug/L	96	h	SW	LC50	Mysidae
206440	12	ug/L	96	h	SW	LC50	Mysidae
206440	2.8	ug/L	96	h	SW	LC50	Mysidae
206440	0.8	ug/L	96	h	SW	LC50	Mysidae
206440	1.7	ug/L	96	h	SW	LC50	Mysidae
12125029	0.19	mg/L	96	h	SW	LC50	Mysidae
12125029	0.19	mg/L	96	h	SW	LC50	Mysidae
12125029	0.19	mg/L	96	h	SW	LC50	Mysidae
12125029	0.32	mg/L	96	h	SW	LC50	Mysidae
12125029	0.28	mg/L	96	h	SW	LC50	Mysidae
12125029	0.28	mg/L	96	h	SW	LC50	Mysidae
12125029	0.63	mg/L	96	h	SW	LC50	Mysidae
12125029	0.57	mg/L	96	h	SW	LC50	Mysidae
12125029	0.54	mg/L	96	h	SW	LC50	Mysidae
12125029	1.2	mg/L	96	h	SW	LC50	Mysidae
12125029	1.08	mg/L	96	h	SW	LC50	Mysidae
12125029	1.11	mg/L	96	h	SW	LC50	Mysidae
12125029	1.3	mg/L	96	h	SW	LC50	Mysidae
12125029	1.28	mg/L	96	h	SW	LC50	Mysidae
12125029	0.69	mg/L	96	h	SW	LC50	Mysidae
12125029	0.77	mg/L	96	h	SW	LC50	Mysidae
12125029	0.64	mg/L	96	h	SW	LC50	Mysidae
12125029	0.68	mg/L	96	h	SW	LC50	Mysidae
12125029	0.53	mg/L	96	h	SW	LC50	Mysidae
12125029	0.45	mg/L	96	h	SW	LC50	Mysidae
12125029	0.38	mg/L	96	h	SW	LC50	Mysidae
12125029	0.6	mg/L	96	h	SW	LC50	Mysidae
12125029	0.5	mg/L	96	h	SW	LC50	Mysidae
12125029	0.44	mg/L	96	h	SW	LC50	Mysidae
12125029	0.36	mg/L	96	h	SW	LC50	Mysidae
12125029	0.33	mg/L	96	h	SW	LC50	Mysidae
12125029	0.34	mg/L	96	h	SW	LC50	Mysidae
12125029	0.56	mg/L	96	h	SW	LC50	Mysidae
12125029	0.58	mg/L	96	h	SW	LC50	Mysidae
12125029	0.48	mg/L	96	h	SW	LC50	Mysidae
12125029	0.27	mg/L	96	h	SW	LC50	Mysidae
12125029	0.28	mg/L	96	h	SW	LC50	Mysidae
12125029	0.27	mg/L	96	h	SW	LC50	Mysidae
12125029	0.44	mg/L	96	h	SW	LC50	Mysidae
10043353	84.39	mg/L	96	h	SW	LC50	Mysidae
10043353	83.56	mg/L	96	h	SW	LC50	Mysidae
10043353	73.79	mg/L	96	h	SW	LC50	Mysidae
10043353	93.31	mg/L	96	h	SW	LC50	Mysidae
92875	4.47	mg/L	96	h	SW	LC50	Mysidae
7761888	249.3	ppb	96	h	SW	LC50	Mysidae
84852153	0.043	mg/L	96	h	SW	LC50	Mysidae
333415	8.5	ug/L	96	h	SW	LC50	Mysidae
3251238	141	ppb	96	h	SW	LC50	Mysidae
76017	0.39	mg/L	96	h	SW	LC50	Mysidae
7440020	783.6	ppb	96	h	SW	LC50	Mysidae
7440020	615.1	ppb	96	h	SW	LC50	Mysidae
151213	9.88	ppm	96	h	SW	LC50	Mysidae
50282	0.89	mg/L	96	h	SW	LC50	Mysidae
80057	1.03	mg/L	96	h	SW	LC50	Mysidae
40596698	0.23	mg/L	96	h	SW	LC50	Mysidae
3604873	1	mg/L	96	h	SW	LC50	Mysidae
5289747	1	mg/L	96	h	SW	LC50	Mysidae
112410238	10	mg/L	96	h	SW	LC50	Mysidae
13408565	5	mg/L	96	h	SW	LC50	Mysidae
25154523	0.045	mg/L	96	h	SW	LC50	Mysidae
7758987	164	ug/L	96	h	SW	LC50	Mysidae
7758987	220	ug/L	96	h	SW	LC50	Mysidae
7758987	209	ug/L	96	h	SW	LC50	Mysidae
7758987	189	ug/L	96	h	SW	LC50	Mysidae
7758987	237	ug/L	96	h	SW	LC50	Mysidae
7758987	218	ug/L	96	h	SW	LC50	Mysidae
7758987	199	ug/L	96	h	SW	LC50	Mysidae
7758987	284	ug/L	96	h	SW	LC50	Mysidae
7758987	204	ug/L	96	h	SW	LC50	Mysidae
7447394	46	ug/L	96	h	SW	LC50	Mysidae
7447394	68	ug/L	96	h	SW	LC50	Mysidae
298022	1.9	ug/L	96	h	SW	LC50	Mysidae
298022	0.33	ug/L	96	h	SW	LC50	Mysidae
1912249	5.4	AI mg/L	96	h	SW	LC50	Mysidae
91203	0.8	ppm	96	h	SW	LC50	Mysidae
91203	1.35	ppm	96	h	SW	LC50	Mysidae
91203	1.25	ppm	96	h	SW	LC50	Mysidae
91203	1.42	ppm	96	h	SW	LC50	Mysidae
40596698	0.32	mg/L	96	h	SW	LC50	Mysidae
86500	0.22	ug/L	96	h	SW	LC50	Mysidae
30560191	7300	ug/L	96	h	SW	LC50	Mysidae
90153	0.2	AI mg/L	96	h	SW	LC50	Mysidae
101202	10	ug/L	96	h	SW	LC50	Mysidae
101202	11	ug/L	96	h	SW	LC50	Mysidae
101202	13	ug/L	96	h	SW	LC50	Mysidae
101202	10	ug/L	96	h	SW	LC50	Mysidae
101202	15	ug/L	96	h	SW	LC50	Mysidae
57636	1.2	mg/L	96	h	SW	LC50	Mysidae
298000	0.98	ug/L	96	h	SW	LC50	Mysidae
298000	0.77	ug/L	96	h	SW	LC50	Mysidae
2921882	0.15	ug/L	96	h	SW	LC50	Mysidae
2921882	0.13	ug/L	96	h	SW	LC50	Mysidae
2921882	0.19	ug/L	96	h	SW	LC50	Mysidae
78875	24.79	mg/L	96	h	SW	LC50	Mysidae
83329	460	ug/L	96	h	SW	LC50	Mysidae
85018	27.1	ug/L	96	h	SW	LC50	Mysidae
78875	26.65	mg/L	96	h	SW	LC50	Mysidae
72490018	0.53	mg/L	96	h	SW	LC50	Mysidae
116063	13	ug/L	96	h	SW	LC50	Mysidae
116063	16	ug/L	96	h	SW	LC50	Mysidae
60515	543	ug/L	96	h	SW	LC50	Mysidae
84087014	11211	ug/L	96	h	SW	LC50	Mysidae
13194484	23	ug/L	96	h	SW	LC50	Mysidae
13194484	7.5	ug/L	96	h	SW	LC50	Mysidae
7733020	0.78	mg/L	96	h	SW	LC50	Mysidae
7733020	0.88	mg/L	96	h	SW	LC50	Mysidae
7733020	0.68	mg/L	96	h	SW	LC50	Mysidae
8001589	4.5	mg/L	96	h	SW	LC50	Mysidae
8001589	1	mg/L	96	h	SW	LC50	Mysidae
8001589	18.6	mg/L	96	h	SW	LC50	Mysidae
8001589	17.7	mg/L	96	h	SW	LC50	Mysidae
8001589	240	mg/L	96	h	SW	LC50	Mysidae
8002059	5	mg/L	96	h	SW	LC50	Mysidae
8002059	500	ug/L	96	h	SW	LC50	Mysidae
8002059	600	ug/L	96	h	SW	LC50	Mysidae
8002059	700	ug/L	96	h	SW	LC50	Mysidae
8001589	10.5	mg/L	96	h	SW	LC50	Mysidae
8001589	1	mg/L	96	h	SW	LC50	Mysidae
8001589	14.6	mg/L	96	h	SW	LC50	Mysidae
8002059	6	mg/L	96	h	SW	LC50	Mysidae
8002059	5	mg/L	96	h	SW	LC50	Mysidae
8002059	8	mg/L	96	h	SW	LC50	Mysidae
8002059	700	ug/L	96	h	SW	LC50	Mysidae
8002059	700	ug/L	96	h	SW	LC50	Mysidae
8002059	4.51	mg/L	96	h	SW	LC50	Mysidae
8002059	486	ug/L	96	h	SW	LC50	Mysidae
8002059	624	ug/L	96	h	SW	LC50	Mysidae
8002059	700	ug/L	96	h	SW	LC50	Mysidae
8002059	600	ug/L	96	h	SW	LC50	Mysidae
8002059	6	mg/L	96	h	SW	LC50	Mysidae
8002059	7	mg/L	96	h	SW	LC50	Mysidae
8002059	7.57	mg/L	96	h	SW	LC50	Mysidae
8002059	6	mg/L	96	h	SW	LC50	Mysidae
8002059	48	%	96	h	SW	LC50	Mysidae
8002059	32	%	96	h	SW	LC50	Mysidae
8002059	38	%	96	h	SW	LC50	Mysidae
8002059	35	%	96	h	SW	LC50	Mysidae
8002059	100	%	96	h	SW	LC50	Mysidae
8002059	36	%	96	h	SW	LC50	Mysidae
8002059	79	%	96	h	SW	LC50	Mysidae
8002059	7	mg/L	96	h	SW	LC50	Mysidae
8002059	8	mg/L	96	h	SW	LC50	Mysidae
8002059	700	ug/L	96	h	SW	LC50	Mysidae
8002059	43	%	96	h	SW	LC50	Mysidae
8002059	78	%	96	h	SW	LC50	Mysidae
8002059	84	%	96	h	SW	LC50	Mysidae
10108642	45	ug/L	96	h	SW	LC50	Mysidae
10108642	318	ug/L	96	h	SW	LC50	Mysidae
10099748	4274	ug/L	96	h	SW	LC50	Mysidae
7487947	6.9	ug/L	96	h	SW	LC50	Mysidae
7487947	7	ug/L	96	h	SW	LC50	Mysidae
7646857	1037	ug/L	96	h	SW	LC50	Mysidae
7718549	765	ug/L	96	h	SW	LC50	Mysidae
7718549	1042	ug/L	96	h	SW	LC50	Mysidae
1912249	48	ug/L	96	h	SW	LC50	Mysidae
8002059	8	mg/L	96	h	SW	LC50	Mysidae
8002059	600	ug/L	96	h	SW	LC50	Mysidae
8002059	600	ug/L	96	h	SW	LC50	Mysidae
7646857	540	ug/L	96	h	SW	LC50	Mysidae
10099748	1140	ug/L	96	h	SW	LC50	Mysidae
13311847	1.38	mg/L	96	h	SW	LC50	Mysidae
8002059	28.55	mg/L	96	h	SW	LC50	Mysidae
8002059	25.45	mg/L	96	h	SW	LC50	Mysidae
8002059	34.68	mg/L	96	h	SW	LC50	Mysidae
644064	0.77	mg/L	96	h	SW	LC50	Mysidae
25154523	0.59	mg/L	96	h	SW	LC50	Mysidae
688733	0.42	ug/L	96	h	SW	LC50	Mysidae
58220	1.95	mg/L	96	h	SW	LC50	Mysidae
7761888	260	ug/L	96	h	SW	LC50	Mysidae
7761888	260	ug/L	96	h	SW	LC50	Mysidae
7761888	280	ug/L	96	h	SW	LC50	Mysidae
35367385	4.4	AI ug/L	96	h	SW	LC50	Mysidae
63252	19	ug/L	96	h	SW	LC50	Mysidae
63252	8.46	ug/L	96	h	SW	LC50	Mysidae
122453730	3.05	AI ug/L	96	h	SW	LC50	Mysidae
7786303	0.1113	M	96	h	SW	LC50	Mysidae
7447407	0.0133	M	96	h	SW	LC50	Mysidae
144558	0.02101	M	96	h	SW	LC50	Mysidae
7757826	0.1045	M	96	h	SW	LC50	Mysidae
7758987	0.11	mg/L	96	h	SW	LC50	Mysidae
7758987	0.12	mg/L	96	h	SW	LC50	Mysidae
7758987	0.12	mg/L	96	h	SW	LC50	Mysidae
7758987	0.25	mg/L	96	h	SW	LC50	Mysidae
7758987	0.18	mg/L	96	h	SW	LC50	Mysidae
7447394	0.14	mg/L	96	h	SW	LC50	Mysidae
7447394	0.15	mg/L	96	h	SW	LC50	Mysidae
7447394	0.14	mg/L	96	h	SW	LC50	Mysidae
7447394	0.15	mg/L	96	h	SW	LC50	Mysidae
7447394	0.18	mg/L	96	h	SW	LC50	Mysidae
50293	0.45	ug/L	96	h	SW	LC50	Mysidae
60571	3.7	ug/L	96	h	SW	LC50	Mysidae
60571	4.5	ug/L	96	h	SW	LC50	Mysidae
76448	3.4	ug/L	96	h	SW	LC50	Mysidae
112276	10.8	g/L	96	h	SW	LC50	Mysidae
67641	4.1	g/L	96	h	SW	LC50	Mysidae
87683	59	ug/L	96	h	SW	LC50	Mysidae
77474	32	ug/L	96	h	SW	LC50	Mysidae
77474	7	ug/L	96	h	SW	LC50	Mysidae
87865	320	ug/L	96	h	SW	LC50	Mysidae
96489713	16.4	ug/L	96	h	SW	LC50	Mysidae
96489713	0.67	AI ug/L	96	h	SW	LC50	Mysidae
143339	37	ug/L	96	h	SW	LC50	Mysidae
7778509	2.01	mg/L	96	h	SW	LC50	Mysidae
7778509	2.08	mg/L	96	h	SW	LC50	Mysidae
7778509	2.15	mg/L	96	h	SW	LC50	Mysidae
7778509	2.3	mg/L	96	h	SW	LC50	Mysidae
7778509	2.11	mg/L	96	h	SW	LC50	Mysidae
10108642	0.14	mg/L	96	h	SW	LC50	Mysidae
10108642	0.11	mg/L	96	h	SW	LC50	Mysidae
10108642	0.08	mg/L	96	h	SW	LC50	Mysidae
10108642	0.07	mg/L	96	h	SW	LC50	Mysidae
10108642	0.07	mg/L	96	h	SW	LC50	Mysidae
151213	4.92	mg/L	96	h	SW	LC50	Mysidae
151213	5.21	mg/L	96	h	SW	LC50	Mysidae
151213	5.33	mg/L	96	h	SW	LC50	Mysidae
151213	5.73	mg/L	96	h	SW	LC50	Mysidae
151213	5.39	mg/L	96	h	SW	LC50	Mysidae
7447407	475	mg/L	96	h	SW	LC50	Mysidae
7447407	506	mg/L	96	h	SW	LC50	Mysidae
7447407	485	mg/L	96	h	SW	LC50	Mysidae
7447407	426	mg/L	96	h	SW	LC50	Mysidae
7447407	438	mg/L	96	h	SW	LC50	Mysidae
151213	20.3	mg/L	96	h	SW	LC50	Mysidae
151213	20.6	mg/L	96	h	SW	LC50	Mysidae
151213	15.4	mg/L	96	h	SW	LC50	Mysidae
83329	0.16	mg/L	96	h	SW	LC50	Mysidae
83329	0.19	mg/L	96	h	SW	LC50	Mysidae
634902	0.041	mg/L	96	h	SW	LC50	Mysidae
634902	0.086	mg/L	96	h	SW	LC50	Mysidae
98953	8.9	mg/L	96	h	SW	LC50	Mysidae
98953	11	mg/L	96	h	SW	LC50	Mysidae
95578	1	mg/L	96	h	SW	LC50	Mysidae
95578	1.8	mg/L	96	h	SW	LC50	Mysidae
95578	1.5	mg/L	96	h	SW	LC50	Mysidae
95578	3.3	mg/L	96	h	SW	LC50	Mysidae
206440	0.021	mg/L	96	h	SW	LC50	Mysidae
206440	0.043	mg/L	96	h	SW	LC50	Mysidae
206440	0.035	mg/L	96	h	SW	LC50	Mysidae
542756	1.2	mg/L	96	h	SW	LC50	Mysidae
542756	0.64	mg/L	96	h	SW	LC50	Mysidae
107028	0.091	mg/L	96	h	SW	LC50	Mysidae
107028	0.013	mg/L	96	h	SW	LC50	Mysidae
101553	0.11	mg/L	96	h	SW	LC50	Mysidae
101553	0.042	mg/L	96	h	SW	LC50	Mysidae
66251	5.3	mg/L	96	h	SW	LC50	Mysidae
66251	2.8	mg/L	96	h	SW	LC50	Mysidae
100527	1.4	mg/L	96	h	SW	LC50	Mysidae
100527	1	mg/L	96	h	SW	LC50	Mysidae
306672	103	mg/L	96	h	SW	LC50	Mysidae
142289	7.3	mg/L	96	h	SW	LC50	Mysidae
206440	0.087	mg/L	96	h	SW	LC50	Mysidae
127184	2.85	mg/L	96	h	SW	LC50	Mysidae
83329	0.97	ppm	96	h	SW	LC50	Mysidae
1309644	4.15	ppm	96	h	SW	LC50	Mysidae
108907	16.4	ppm	96	h	SW	LC50	Mysidae
95501	1.97	ppm	96	h	SW	LC50	Mysidae
541731	2.85	ppm	96	h	SW	LC50	Mysidae
106467	1.99	ppm	96	h	SW	LC50	Mysidae
120821	0.45	ppm	96	h	SW	LC50	Mysidae
634902	0.34	ppm	96	h	SW	LC50	Mysidae
95943	1.48	ppm	96	h	SW	LC50	Mysidae
608935	0.16	ppm	96	h	SW	LC50	Mysidae
107062	113	ppm	96	h	SW	LC50	Mysidae
71556	31.2	ppm	96	h	SW	LC50	Mysidae
79345	9.02	ppm	96	h	SW	LC50	Mysidae
76017	5.06	ppm	96	h	SW	LC50	Mysidae
67721	0.94	ppm	96	h	SW	LC50	Mysidae
2234131	500	ppm	96	h	SW	LC50	Mysidae
90131	0.37	ppm	96	h	SW	LC50	Mysidae
106489	29.7	ppm	96	h	SW	LC50	Mysidae
95954	3.83	ppm	96	h	SW	LC50	Mysidae
935955	21.9	ppm	96	h	SW	LC50	Mysidae
75354	224	ppm	96	h	SW	LC50	Mysidae
142289	10.3	ppm	96	h	SW	LC50	Mysidae
542756	0.79	ppm	96	h	SW	LC50	Mysidae
602017	0.59	ppm	96	h	SW	LC50	Mysidae
100414	87.6	ppm	96	h	SW	LC50	Mysidae
206440	0.04	ppm	96	h	SW	LC50	Mysidae
75252	24.4	ppm	96	h	SW	LC50	Mysidae
75092	256	ppm	96	h	SW	LC50	Mysidae
78591	12.9	ppm	96	h	SW	LC50	Mysidae
98953	6.68	ppm	96	h	SW	LC50	Mysidae
100027	7.17	ppm	96	h	SW	LC50	Mysidae
51285	4.85	ppm	96	h	SW	LC50	Mysidae
88891	19.7	ppm	96	h	SW	LC50	Mysidae
85687	9.63	ppm	96	h	SW	LC50	Mysidae
84662	7.59	ppm	96	h	SW	LC50	Mysidae
131113	73.7	ppm	96	h	SW	LC50	Mysidae
7783008	0.6	ppm	96	h	SW	LC50	Mysidae
127184	10.2	ppm	96	h	SW	LC50	Mysidae
7446186	2.13	ppm	96	h	SW	LC50	Mysidae
108883	56.3	ppm	96	h	SW	LC50	Mysidae
786196	13	ug/L	96	h	SW	LC50	Mysidae
786196	3	ug/L	96	h	SW	LC50	Mysidae
78488	5.8	ug/L	96	h	SW	LC50	Mysidae
78488	4.6	ug/L	96	h	SW	LC50	Mysidae
2104645	13	ug/L	96	h	SW	LC50	Mysidae
2104645	3.4	ug/L	96	h	SW	LC50	Mysidae
12125029	36.6	ppm	96	h	SW	LC50	Mysidae
3380345	74.3	ug/L	96	h	SW	LC50	Mysidae
99650	7.1	mg/L	96	h	SW	LC50	Mysidae
99650	6.1	mg/L	96	h	SW	LC50	Mysidae
99354	1.3	mg/L	96	h	SW	LC50	Mysidae
99354	0.74	mg/L	96	h	SW	LC50	Mysidae
121142	5.4	mg/L	96	h	SW	LC50	Mysidae
121142	4.4	mg/L	96	h	SW	LC50	Mysidae
606202	5.6	mg/L	96	h	SW	LC50	Mysidae
606202	5	mg/L	96	h	SW	LC50	Mysidae
118967	0.98	mg/L	96	h	SW	LC50	Mysidae
118967	0.26	mg/L	96	h	SW	LC50	Mysidae
88891	13	mg/L	96	h	SW	LC50	Mysidae
479458	1.3	mg/L	96	h	SW	LC50	Mysidae
479458	0.37	mg/L	96	h	SW	LC50	Mysidae
121824	47	mg/L	96	h	SW	LC50	Mysidae
2921882	0.04	ug/L	96	h	SW	LC50	Mysidae
173584446	0.0542	ppm	96	h	SW	LC50	Mysidae
95737681	65	ppb	96	h	SW	LC50	Mysidae
98500	108	ppm	96	h	SW	LC50	Mysidae
210880925	0.051	ppm	96	h	SW	LC50	Mysidae
131983727	1.6	ppm	96	h	SW	LC50	Mysidae
129630199	60	ppb	96	h	SW	LC50	Mysidae
7166190	120	ppb	96	h	SW	LC50	Mysidae
27314132	5.53	ppm	96	h	SW	LC50	Mysidae
122836355	1	ppm	96	h	SW	LC50	Mysidae
56382	0.12	ppb	96	h	SW	LC50	Mysidae
50471448	1.8	ppm	96	h	SW	LC50	Mysidae
96182535	6.63	ppb	96	h	SW	LC50	Mysidae
155569918	0.04	ppb	96	h	SW	LC50	Mysidae
13121705	0.46	ppb	96	h	SW	LC50	Mysidae
131860338	56	ppb	96	h	SW	LC50	Mysidae
148788550	73	ppb	96	h	SW	LC50	Mysidae
83055996	130	ppm	96	h	SW	LC50	Mysidae
148477718	37	ppb	96	h	SW	LC50	Mysidae
1982496	6.5	ppm	96	h	SW	LC50	Mysidae
148798	0.34	ppm	96	h	SW	LC50	Mysidae
101200480	139	ppm	96	h	SW	LC50	Mysidae
55283686	230	ppb	96	h	SW	LC50	Mysidae
874967676	1.5	ppm	96	h	SW	LC50	Mysidae
69409945	0.021	ppb	96	h	SW	LC50	Mysidae
108731700	22.1	ppm	96	h	SW	LC50	Mysidae
950378	0.7	ppb	96	h	SW	LC50	Mysidae
137268	3.36	ppb	96	h	SW	LC50	Mysidae
2439103	2300	ppb	96	h	SW	LC50	Mysidae
76879	3.7	ppb	96	h	SW	LC50	Mysidae
7778394	2	ppm	96	h	SW	LC50	Mysidae
63252	5.66	ppb	96	h	SW	LC50	Mysidae
2212671	0.76	ppm	96	h	SW	LC50	Mysidae
41198087	2.37	ppb	96	h	SW	LC50	Mysidae
56359	3.2	ppb	96	h	SW	LC50	Mysidae
10222012	0.72	ppm	96	h	SW	LC50	Mysidae
361377299	51.6	ppb	96	h	SW	LC50	Mysidae
23103982	19.6	ppm	96	h	SW	LC50	Mysidae
68694111	0.6	ppm	96	h	SW	LC50	Mysidae
759944	3.7	ppm	96	h	SW	LC50	Mysidae
213464778	122	ppm	96	h	SW	LC50	Mysidae
219714962	114	ppm	96	h	SW	LC50	Mysidae
61791648	190	ppb	96	h	SW	LC50	Mysidae
28249776	150	ppb	96	h	SW	LC50	Mysidae
7704349	736	ppm	96	h	SW	LC50	Mysidae
71751412	0.21	ppb	96	h	SW	LC50	Mysidae
55566308	3.6	ppm	96	h	SW	LC50	Mysidae
120068373	0.14	ppb	96	h	SW	LC50	Mysidae
119446683	0.15	ppm	96	h	SW	LC50	Mysidae
81591813	29	ppm	96	h	SW	LC50	Mysidae
7166190	51	ppb	96	h	SW	LC50	Mysidae
55512339	4	ppm	96	h	SW	LC50	Mysidae
55512339	3.8	ppm	96	h	SW	LC50	Mysidae
96489713	0.67	ppb	96	h	SW	LC50	Mysidae
57966957	44.4	ppm	96	h	SW	LC50	Mysidae
74051802	141.8	ppm	96	h	SW	LC50	Mysidae
420042	6.3	ppm	96	h	SW	LC50	Mysidae
161050584	1.3	ppm	96	h	SW	LC50	Mysidae
115322	60	ppb	96	h	SW	LC50	Mysidae
104206828	3.3	ppm	96	h	SW	LC50	Mysidae
121755	1.96	ppb	96	h	SW	LC50	Mysidae
145733	39	ppm	96	h	SW	LC50	Mysidae
111308	5.5	ppm	96	h	SW	LC50	Mysidae
8018017	10.5	ppb	96	h	SW	LC50	Mysidae
134605644	0.14	ppm	96	h	SW	LC50	Mysidae
51596113	0.27	ppb	96	h	SW	LC50	Mysidae
317815831	94	ppm	96	h	SW	LC50	Mysidae
134098616	3.7	ppb	96	h	SW	LC50	Mysidae
372137354	8.5	ppm	96	h	SW	LC50	Mysidae
66441234	0.098	ppm	96	h	SW	LC50	Mysidae
66441234	0.107	ppm	96	h	SW	LC50	Mysidae
950782862	1.5	ppm	96	h	SW	LC50	Mysidae
9006422	25.16	ppb	96	h	SW	LC50	Mysidae
99129212	33	ppm	96	h	SW	LC50	Mysidae
39515418	0.33	ppb	96	h	SW	LC50	Mysidae
13356086	2.8	ppb	96	h	SW	LC50	Mysidae
15299997	4.2	ppm	96	h	SW	LC50	Mysidae
1929777	4.4	ppm	96	h	SW	LC50	Mysidae
33089611	0.48	ppm	96	h	SW	LC50	Mysidae
68424851	0.092	ppm	96	h	SW	LC50	Mysidae
112410238	1.4	ppm	96	h	SW	LC50	Mysidae
52918635	0.0037	ppb	96	h	SW	LC50	Mysidae
52315078	0.007	ppb	96	h	SW	LC50	Mysidae
63252	9.3	ppb	96	h	SW	LC50	Mysidae
12427382	0.033	ppm	96	h	SW	LC50	Mysidae
26530201	71	ppb	96	h	SW	LC50	Mysidae
60207901	0.51	ppm	96	h	SW	LC50	Mysidae
138261413	0.159	ppm	96	h	SW	LC50	Mysidae
62924703	94	ppb	96	h	SW	LC50	Mysidae
25606411	50.5	ppm	96	h	SW	LC50	Mysidae
4719044	12	ppm	96	h	SW	LC50	Mysidae
243973208	8.1	ppm	96	h	SW	LC50	Mysidae
94746	1	ppm	96	h	SW	LC50	Mysidae
54593838	0.054	ppb	96	h	SW	LC50	Mysidae
54593838	0.1	ppb	96	h	SW	LC50	Mysidae
51707552	3.2	ppm	96	h	SW	LC50	Mysidae
141662	0.077	ppm	96	h	SW	LC50	Mysidae
77182822	7.5	ppm	96	h	SW	LC50	Mysidae
96489713	2.98	ppb	96	h	SW	LC50	Mysidae
62737	0.044	ppm	96	h	SW	LC50	Mysidae
29091212	2100	ppb	96	h	SW	LC50	Mysidae
87392129	1.41	ppm	96	h	SW	LC50	Mysidae
13071799	0.4	ppb	96	h	SW	LC50	Mysidae
23950585	3.9	ppm	96	h	SW	LC50	Mysidae
2163806	173	ppm	96	h	SW	LC50	Mysidae
137304	14	ppb	96	h	SW	LC50	Mysidae
122453730	2.03	ppb	96	h	SW	LC50	Mysidae
125401925	130	ppm	96	h	SW	LC50	Mysidae
149979419	1.14	ppm	96	h	SW	LC50	Mysidae
114311329	100	ppm	96	h	SW	LC50	Mysidae
116714466	0.13	ppb	96	h	SW	LC50	Mysidae
112281773	0.43	ppm	96	h	SW	LC50	Mysidae
283594901	76	ppb	96	h	SW	LC50	Mysidae
129909906	109.7	ppm	96	h	SW	LC50	Mysidae
858956088	122	ppm	96	h	SW	LC50	Mysidae
81777891	0.566	ppm	96	h	SW	LC50	Mysidae
85007	2	ppm	96	h	SW	LC50	Mysidae
2439012	8.5	ppb	96	h	SW	LC50	Mysidae
57837191	0.73	ppm	96	h	SW	LC50	Mysidae
2921882	0.045	ppb	96	h	SW	LC50	Mysidae
17804352	140	ppb	96	h	SW	LC50	Mysidae
128041	0.088	ppm	96	h	SW	LC50	Mysidae
117718602	2	ppm	96	h	SW	LC50	Mysidae
138261413	0.038	ppm	96	h	SW	LC50	Mysidae
74051802	0.8	ppm	96	h	SW	LC50	Mysidae
1689992	65	ppb	96	h	SW	LC50	Mysidae
24307264	136	ppm	96	h	SW	LC50	Mysidae
95266403	6.5	ppm	96	h	SW	LC50	Mysidae
28159980	0.4	ppm	96	h	SW	LC50	Mysidae
17804352	175	ppb	96	h	SW	LC50	Mysidae
1344816	89	ppb	96	h	SW	LC50	Mysidae
203313251	5.5	ppm	96	h	SW	LC50	Mysidae
82097505	21.5	ppm	96	h	SW	LC50	Mysidae
98011	15	ppm	96	h	SW	LC50	Mysidae
66441234	1.71	ppm	96	h	SW	LC50	Mysidae
82688	0.023	ppm	96	h	SW	LC50	Mysidae
79983714	2	ppm	96	h	SW	LC50	Mysidae
64902723	89	ppm	96	h	SW	LC50	Mysidae
1194656	2.35	ppm	96	h	SW	LC50	Mysidae
944229	0.49	ppb	96	h	SW	LC50	Mysidae
298022	1.4	ppb	96	h	SW	LC50	Mysidae
29450451	200	ppb	96	h	SW	LC50	Mysidae
110488705	33	ppm	96	h	SW	LC50	Mysidae
95737681	67	ppb	96	h	SW	LC50	Mysidae
141112290	0.0178	ppm	96	h	SW	LC50	Mysidae
123312890	66.9	ppm	96	h	SW	LC50	Mysidae
126114	95.5	ppm	96	h	SW	LC50	Mysidae
52315078	0.0055	ppb	96	h	SW	LC50	Mysidae
8018017	9.5	ppb	96	h	SW	LC50	Mysidae
153233911	4.42	ppb	96	h	SW	LC50	Mysidae
131807573	3.9	ppb	96	h	SW	LC50	Mysidae
188489078	2.1	ppm	96	h	SW	LC50	Mysidae
57960197	0.94	ppb	96	h	SW	LC50	Mysidae
111988499	0.031	ppm	96	h	SW	LC50	Mysidae
165252700	0.79	ppm	96	h	SW	LC50	Mysidae
63252	6.7	ppb	96	h	SW	LC50	Mysidae
69409945	0.11	ppb	96	h	SW	LC50	Mysidae
950378	0.59	ppb	96	h	SW	LC50	Mysidae
333415	4.82	ppb	96	h	SW	LC50	Mysidae
62476599	3.8	ppm	96	h	SW	LC50	Mysidae
133073	160	ppb	96	h	SW	LC50	Mysidae
88671890	0.24	ppm	96	h	SW	LC50	Mysidae
298044	100	ppb	96	h	SW	LC50	Mysidae
330552	3.3	ppm	96	h	SW	LC50	Mysidae
122931480	110	ppm	96	h	SW	LC50	Mysidae
74222972	44.8	ppm	96	h	SW	LC50	Mysidae
76879	4.3	ppb	96	h	SW	LC50	Mysidae
63252	20.2	ppb	96	h	SW	LC50	Mysidae
35691657	2.7	ppm	96	h	SW	LC50	Mysidae
60207901	1.42	ppm	96	h	SW	LC50	Mysidae
55406536	89.8	ppb	96	h	SW	LC50	Mysidae
24579735	104.7	ppm	96	h	SW	LC50	Mysidae
1317391	69.7	ppb	96	h	SW	LC50	Mysidae
97886458	0.58	ppm	96	h	SW	LC50	Mysidae
114369436	633	ppb	96	h	SW	LC50	Mysidae
298000	0.35	ppb	96	h	SW	LC50	Mysidae
23564058	1.1	ppm	96	h	SW	LC50	Mysidae
100784201	109	ppm	96	h	SW	LC50	Mysidae
59669260	0.1	ppm	96	h	SW	LC50	Mysidae
10605217	98	ppb	96	h	SW	LC50	Mysidae
17804352	173	ppb	96	h	SW	LC50	Mysidae
2939802	212	ppb	96	h	SW	LC50	Mysidae
1861401	43	ppb	96	h	SW	LC50	Mysidae
7681529	0.16	ppm	96	h	SW	LC50	Mysidae
71283802	0.11	ppm	96	h	SW	LC50	Mysidae
72490018	0.35	ppm	96	h	SW	LC50	Mysidae
624920	4.9	ppm	96	h	SW	LC50	Mysidae
64742898	500000	ppm	96	h	SW	LC50	Mysidae
2527664	0.48	ppm	96	h	SW	LC50	Mysidae
120928098	5	ppb	96	h	SW	LC50	Mysidae
500008457	1.15	ppm	96	h	SW	LC50	Mysidae
116714466	0.12	ppb	96	h	SW	LC50	Mysidae
16752775	230	ppb	96	h	SW	LC50	Mysidae
113136779	5	ppm	96	h	SW	LC50	Mysidae
143390890	59	ppb	96	h	SW	LC50	Mysidae
13071799	0.22	ppb	96	h	SW	LC50	Mysidae
121552612	8.14	ppm	96	h	SW	LC50	Mysidae
13463417	4.7	ppb	96	h	SW	LC50	Mysidae
42576023	0.042	ppm	96	h	SW	LC50	Mysidae
163515148	3.2	ppm	96	h	SW	LC50	Mysidae
26002802	0.025	ppb	96	h	SW	LC50	Mysidae
131341861	0.27	ppm	96	h	SW	LC50	Mysidae
103361097	230	ppb	96	h	SW	LC50	Mysidae
65733166	106	ppb	96	h	SW	LC50	Mysidae
79622596	39	ppb	96	h	SW	LC50	Mysidae
66330889	2.2	ppm	96	h	SW	LC50	Mysidae
28382152	103	ppm	96	h	SW	LC50	Mysidae
161326347	0.069	ppm	96	h	SW	LC50	Mysidae
124495187	74.3	ppb	96	h	SW	LC50	Mysidae
68359375	0.0023	ppb	96	h	SW	LC50	Mysidae
111988499	0.05	ppm	96	h	SW	LC50	Mysidae
51036	0.49	ppm	96	h	SW	LC50	Mysidae
210631688	2.7	ppm	96	h	SW	LC50	Mysidae
52315078	0.005	ppb	96	h	SW	LC50	Mysidae
104040780	107	ppm	96	h	SW	LC50	Mysidae
443481	182	ppm	96	h	SW	LC50	Mysidae
67485294	54.4	ppb	96	h	SW	LC50	Mysidae
57837191	1.5	ppm	96	h	SW	LC50	Mysidae
7786347	1.3	ppb	96	h	SW	LC50	Mysidae
34256821	2.2	ppm	96	h	SW	LC50	Mysidae
25954136	136	ppm	96	h	SW	LC50	Mysidae
2164172	3.8	ppm	96	h	SW	LC50	Mysidae
111308	20.6	ppm	96	h	SW	LC50	Mysidae
63252	9.6	ppb	96	h	SW	LC50	Mysidae
7738945	5.9	ppm	96	h	SW	LC50	Mysidae
52517	5.9	ppm	96	h	SW	LC50	Mysidae
22224926	6.8	ppb	96	h	SW	LC50	Mysidae
57837191	25.7	ppm	96	h	SW	LC50	Mysidae
21564170	20.3	ppb	96	h	SW	LC50	Mysidae
25311711	1.7	ppb	96	h	SW	LC50	Mysidae
34256821	5.3	ppm	96	h	SW	LC50	Mysidae
31512740	13000	ppb	96	h	SW	LC50	Mysidae
79241466	0.51	ppm	96	h	SW	LC50	Mysidae
66332965	0.13	ppm	96	h	SW	LC50	Mysidae
77182822	43.2	ppm	96	h	SW	LC50	Mysidae
53780362	133	ppm	96	h	SW	LC50	Mysidae
142459583	2.72	ppm	96	h	SW	LC50	Mysidae
141776321	106	ppm	96	h	SW	LC50	Mysidae
117337196	280	ppb	96	h	SW	LC50	Mysidae
141517217	8.62	ppb	96	h	SW	LC50	Mysidae
102851069	0.0061	ppb	96	h	SW	LC50	Mysidae
76674210	34.9	ppm	96	h	SW	LC50	Mysidae
122548338	79	ppm	96	h	SW	LC50	Mysidae
52517	4.3	ppm	96	h	SW	LC50	Mysidae
86500	0.22	ppb	96	h	SW	LC50	Mysidae
23950585	6.43	ppm	96	h	SW	LC50	Mysidae
658066354	0.51	ppm	96	h	SW	LC50	Mysidae
39515418	0.021	ppb	96	h	SW	LC50	Mysidae
68359375	2.42	ppt	96	h	SW	LC50	Mysidae
79538322	0.053	ppb	96	h	SW	LC50	Mysidae
76578148	0.26	ppm	96	h	SW	LC50	Mysidae
220899036	0.487	ppm	96	h	SW	LC50	Mysidae
79277273	128	ppm	96	h	SW	LC50	Mysidae
86500	0.26	ppb	96	h	SW	LC50	Mysidae
149979419	120	ppm	96	h	SW	LC50	Mysidae
121755	2.2	ppb	96	h	SW	LC50	Mysidae
1071836	190.8	ppm	96	h	SW	LC50	Mysidae
98886443	0.429	ppm	96	h	SW	LC50	Mysidae
135410207	0.066	ppm	96	h	SW	LC50	Mysidae
208465218	111	ppm	96	h	SW	LC50	Mysidae
158062670	121	ppm	96	h	SW	LC50	Mysidae
834128	2.3	ppm	96	h	SW	LC50	Mysidae
68359375	0.0022	ppb	96	h	SW	LC50	Mysidae
181274157	146	ppm	96	h	SW	LC50	Mysidae
134098616	3.7	ppb	96	h	SW	LC50	Mysidae
150114719	100	ppm	96	h	SW	LC50	Mysidae
330541	1.1	ppm	96	h	SW	LC50	Mysidae
120116883	89	ppb	96	h	SW	LC50	Mysidae
69806504	216	ppb	96	h	SW	LC50	Mysidae
886500	0.74	ppm	96	h	SW	LC50	Mysidae
12124979	36	ppb	96	h	SW	LC50	Mysidae
114311329	94.3	ppm	96	h	SW	LC50	Mysidae
239110157	3.2	ppm	96	h	SW	LC50	Mysidae
272451657	28000	ppb	96	h	SW	LC50	Mysidae
139968493	289	ppb	96	h	SW	LC50	Mysidae
8012951	0.7	ppm	96	h	SW	LC50	Mysidae
82688	0.012	ppm	96	h	SW	LC50	Mysidae
298022	0.3	ppb	96	h	SW	LC50	Mysidae
78488	11.5	ppb	96	h	SW	LC50	Mysidae
26225796	5.3	ppm	96	h	SW	LC50	Mysidae
107028	0.5	ppm	96	h	SW	LC50	Mysidae
5915413	0.109	ppm	96	h	SW	LC50	Mysidae
52645531	0.075	ppb	96	h	SW	LC50	Mysidae
2634335	1.4	ppm	96	h	SW	LC50	Mysidae
7775099	1000	ppm	96	h	SW	LC50	Mysidae
91465086	0.0049	ppb	96	h	SW	LC50	Mysidae
94361065	9.6	ppm	96	h	SW	LC50	Mysidae
13194484	18.78	ppb	96	h	SW	LC50	Mysidae
29091212	310	ppb	96	h	SW	LC50	Mysidae
64359815	4.7	ppb	96	h	SW	LC50	Mysidae
33629479	0.07	ppm	96	h	SW	LC50	Mysidae
59669260	0.0293	ppm	96	h	SW	LC50	Mysidae
126833178	4.6	ppm	96	h	SW	LC50	Mysidae
135158542	0.88	ppm	96	h	SW	LC50	Mysidae
133062	8.4	ppm	96	h	SW	LC50	Mysidae
77501634	0.017	ppm	96	h	SW	LC50	Mysidae
52315078	0.0059	ppb	96	h	SW	LC50	Mysidae
116255482	2	ppm	96	h	SW	LC50	Mysidae
542756	0.7	ppm	96	h	SW	LC50	Mysidae
2164070	79	ppm	96	h	SW	LC50	Mysidae
104098488	97.7	ppm	96	h	SW	LC50	Mysidae
175013180	4.16	ppb	96	h	SW	LC50	Mysidae
144550367	100	ppm	96	h	SW	LC50	Mysidae
3653483	386	ppm	96	h	SW	LC50	Mysidae
950378	2.34	ppb	96	h	SW	LC50	Mysidae
55389	0.222	ppb	96	h	SW	LC50	Mysidae
709988	0.4	ppm	96	h	SW	LC50	Mysidae
25057890	132.5	ppm	96	h	SW	LC50	Mysidae
60515	15	ppm	96	h	SW	LC50	Mysidae
52918635	0.0017	ppb	96	h	SW	LC50	Mysidae
111308	7.1	ppm	96	h	SW	LC50	Mysidae
10265926	1.05	ppm	96	h	SW	LC50	Mysidae
133073	12.1	ppm	96	h	SW	LC50	Mysidae
300765	8.8	ppb	96	h	SW	LC50	Mysidae
26172554	330	ppb	96	h	SW	LC50	Mysidae
243973208	8.1	ppm	96	h	SW	LC50	Mysidae
2039465	136	ppm	96	h	SW	LC50	Mysidae
365400119	1.1	ppm	96	h	SW	LC50	Mysidae
335104842	0.1	ppm	96	h	SW	LC50	Mysidae
178928706	2.4	ppm	96	h	SW	LC50	Mysidae
80844071	0.0188	ppb	96	h	SW	LC50	Mysidae
137304	134	ppb	96	h	SW	LC50	Mysidae
86209510	16	ppm	96	h	SW	LC50	Mysidae
78587050	0.11	ppm	96	h	SW	LC50	Mysidae
15627095	490	ppb	96	h	SW	LC50	Mysidae
82657043	0.00397	ppb	96	h	SW	LC50	Mysidae
2212671	2.5	ppm	96	h	SW	LC50	Mysidae
7758192	0.576	ppm	96	h	SW	LC50	Mysidae
71751412	0.022	ppb	96	h	SW	LC50	Mysidae
107534963	0.49	ppm	96	h	SW	LC50	Mysidae
59669260	0.075	ppm	96	h	SW	LC50	Mysidae
53780362	126	ppm	96	h	SW	LC50	Mysidae
56382	0.107	ppb	96	h	SW	LC50	Mysidae
62737	0.019	ppm	96	h	SW	LC50	Mysidae
112226616	3.5	ppm	96	h	SW	LC50	Mysidae
128639021	1.16	ppm	96	h	SW	LC50	Mysidae
2593159	2.45	ppm	96	h	SW	LC50	Mysidae
1071836	79	ppm	96	h	SW	LC50	Mysidae
1071836	40	ppm	96	h	SW	LC50	Mysidae
153719234	6.9	ppm	96	h	SW	LC50	Mysidae
156052685	75	ppb	96	h	SW	LC50	Mysidae
23031369	3.9	ppb	96	h	SW	LC50	Mysidae
149877418	0.058	ppm	96	h	SW	LC50	Mysidae
81335775	114	ppm	96	h	SW	LC50	Mysidae
188425856	3.81	ppm	96	h	SW	LC50	Mysidae
112143825	188	ppb	96	h	SW	LC50	Mysidae
127277536	125	ppm	96	h	SW	LC50	Mysidae
53112280	3.4	ppm	96	h	SW	LC50	Mysidae
61825	2.8	ppm	96	h	SW	LC50	Mysidae
314409	112.9	ppm	96	h	SW	LC50	Mysidae
533744	0.71	ppm	96	h	SW	LC50	Mysidae
52645531	0.47	ppb	96	h	SW	LC50	Mysidae
137417	3.23	ppm	96	h	SW	LC50	Mysidae
1610180	17.7	ppm	96	h	SW	LC50	Mysidae
51218452	4.9	ppm	96	h	SW	LC50	Mysidae
10380286	49.7	ppb	96	h	SW	LC50	Mysidae
19666309	0.27	ppm	96	h	SW	LC50	Mysidae
8003347	1.4	ppb	96	h	SW	LC50	Mysidae
7173515	69	ppb	96	h	SW	LC50	Mysidae
2164172	6.8	ppm	96	h	SW	LC50	Mysidae
138932	0.16	ppm	96	h	SW	LC50	Mysidae
123343168	140	ppm	96	h	SW	LC50	Mysidae
7287196	1.7	ppm	96	h	SW	LC50	Mysidae
42509831	0.5	ppb	96	h	SW	LC50	Mysidae
374726622	1.7	ppm	96	h	SW	LC50	Mysidae
179101816	1	ppb	96	h	SW	LC50	Mysidae
86209510	62	ppm	96	h	SW	LC50	Mysidae
67485294	54.4	ppb	96	h	SW	LC50	Mysidae
183675823	1700	ppb	96	h	SW	LC50	Mysidae
732116	16	ppb	96	h	SW	LC50	Mysidae
333415	4.2	ppb	96	h	SW	LC50	Mysidae
13171216	119	ppb	96	h	SW	LC50	Mysidae
76578148	0.15	ppm	96	h	SW	LC50	Mysidae
142596	0.17	ppm	96	h	SW	LC50	Mysidae
22781233	6.7	ppb	96	h	SW	LC50	Mysidae
68359375	6.37	ppt	96	h	SW	LC50	Mysidae
741582	62.4	ppb	96	h	SW	LC50	Mysidae
87674688	4.8	ppm	96	h	SW	LC50	Mysidae
84087014	69.4	ppm	96	h	SW	LC50	Mysidae
6317186	36	ppb	96	h	SW	LC50	Mysidae
2212671	3.4	ppm	96	h	SW	LC50	Mysidae
2155706	3.2	ppb	96	h	SW	LC50	Mysidae
75605	33	ppm	96	h	SW	LC50	Mysidae
52292178	9	ppm	96	h	SW	LC50	Mysidae
86500	0.29	ug/L	96	h	SW	LC50	Mysidae
114261	36.02	ug/L	96	h	SW	LC50	Mysidae
298022	0.31	ug/L	96	h	SW	LC50	Mysidae
13718268	9.4	mg/L	4	d	SW	LC50	Mysidae
2921882	0.029	ug/L	96	h	SW	LC50	Mysidae
52918635	26.77	ng/L	96	h	SW	LC50	Mysidae
91465086	112.5	ng/L	96	h	SW	LC50	Mysidae
52315078	50.72	ng/L	96	h	SW	LC50	Mysidae
52645531	137.4	ng/L	96	h	SW	LC50	Mysidae
26002802	511.3	ng/L	96	h	SW	LC50	Mysidae
52918635	13.9	AI ng/L	96	h	SW	LC50	Mysidae
35575963	85.5	AI ng/L	96	h	SW	LC50	Mysidae
7722841	973	AI ng/L	96	h	SW	LC50	Mysidae
12125029	0.86	mg/L	96	h	SW	LC50	Mysidae
28249776	740	ug/L	96	h	SW	LC50	Mysidae
300765	13	ug/L	96	h	SW	LC50	Mysidae
87865	320	ug/L	96	h	SW	LC50	Mysidae
62737	13.88	ug/L	96	h	SW	LC50	Mysidae
12125029	85.39	mg/L	96	h	SW	LC50	Mysidae
12125029	51.08	mg/L	96	h	SW	LC50	Mysidae
12125029	98.9	mg/L	96	h	SW	LC50	Mysidae
12125029	44.31	mg/L	96	h	SW	LC50	Mysidae
12125029	49.77	mg/L	96	h	SW	LC50	Mysidae
12125029	58.13	mg/L	96	h	SW	LC50	Mysidae
12125029	46.06	mg/L	96	h	SW	LC50	Mysidae
12125029	43.3	mg/L	96	h	SW	LC50	Mysidae
12125029	41.82	mg/L	96	h	SW	LC50	Mysidae
12125029	47.87	mg/L	96	h	SW	LC50	Mysidae
12125029	25.53	mg/L	96	h	SW	LC50	Mysidae
12125029	24.36	mg/L	96	h	SW	LC50	Mysidae
12125029	36.6	mg/L	96	h	SW	LC50	Mysidae
12125029	2.81	mg/L	96	h	SW	LC50	Mysidae
12125029	6.16	mg/L	96	h	SW	LC50	Mysidae
12125029	8.92	mg/L	96	h	SW	LC50	Mysidae
2921882	0.128	ug/L	96	h	SW	LC50	Mysidae
29232937	1.331	ug/L	96	h	SW	LC50	Mysidae
115297	3.2	ug/L	96	h	SW	LC50	Mysidae
333415	4.026	ug/L	96	h	SW	LC50	Mysidae
87865	262.2	ug/L	96	h	SW	LC50	Mysidae
15307865	2919	ug/L	96	h	SW	LC50	Mysidae
70288867	0.7	ug/L	96	h	SW	LC50	Mysidae
75070	22.4	mg/L	96	h	SW	LC50	Mysidae
75070	28.6	mg/L	96	h	SW	LC50	Mysidae
79061	19.3	mg/L	96	h	SW	LC50	Mysidae
79061	31.7	mg/L	96	h	SW	LC50	Mysidae
107131	8.51	mg/L	96	h	SW	LC50	Mysidae
107131	5.81	mg/L	96	h	SW	LC50	Mysidae
98011	14.1	mg/L	96	h	SW	LC50	Mysidae
98011	8.76	mg/L	96	h	SW	LC50	Mysidae
110861	100	mg/L	96	h	SW	LC50	Mysidae
110861	234	mg/L	96	h	SW	LC50	Mysidae
7705080	115	mg/L	96	h	SW	LC50	Mysidae
7705080	102	mg/L	96	h	SW	LC50	Mysidae
1313275	123	mg/L	96	h	SW	LC50	Mysidae
1313275	180	mg/L	96	h	SW	LC50	Mysidae
145733	150	mg/L	96	h	SW	LC50	Mysidae
145733	355	mg/L	96	h	SW	LC50	Mysidae
88857	0.32	mg/L	96	h	SW	LC50	Mysidae
88857	0.17	mg/L	96	h	SW	LC50	Mysidae
93765	20	mg/L	96	h	SW	LC50	Mysidae
93765	42	mg/L	96	h	SW	LC50	Mysidae
93721	31.6	mg/L	96	h	SW	LC50	Mysidae
93721	27.9	mg/L	96	h	SW	LC50	Mysidae
76062	30	ug/L	96	h	SW	LC50	Mysidae
76062	258	ug/L	96	h	SW	LC50	Mysidae
23184669	0.32	mg/L	96	h	SW	LC50	Mysidae
23184669	0.23	mg/L	96	h	SW	LC50	Mysidae
1918021	2.37	mg/L	96	h	SW	LC50	Mysidae
1918021	2.98	mg/L	96	h	SW	LC50	Mysidae
786196	27.1	ug/L	96	h	SW	LC50	Mysidae
786196	25.3	ug/L	96	h	SW	LC50	Mysidae
786196	36.6	ug/L	96	h	SW	LC50	Mysidae
786196	53	ug/L	96	h	SW	LC50	Mysidae
786196	57.2	ug/L	96	h	SW	LC50	Mysidae
786196	38.2	ug/L	96	h	SW	LC50	Mysidae
52315078	12.8	ng/L	96	h	SW	LC50	Mysidae
52315078	12.8	ng/L	96	h	SW	LC50	Mysidae
52315078	20.5	ng/L	96	h	SW	LC50	Mysidae
52315078	18.2	ng/L	96	h	SW	LC50	Mysidae
52315078	20.4	ng/L	96	h	SW	LC50	Mysidae
52315078	18.4	ng/L	96	h	SW	LC50	Mysidae
121755	4	ug/L	96	h	SW	LC50	Mysidae
121755	3.2	ug/L	96	h	SW	LC50	Mysidae
121755	5.2	ug/L	96	h	SW	LC50	Mysidae
121755	5.7	ug/L	96	h	SW	LC50	Mysidae
121755	5	ug/L	96	h	SW	LC50	Mysidae
121755	5.4	ug/L	96	h	SW	LC50	Mysidae
140669	55.1	ug/L	96	h	SW	LC50	Mysidae
140669	47.9	ug/L	96	h	SW	LC50	Mysidae
140669	105.6	ug/L	96	h	SW	LC50	Mysidae
140669	53.4	ug/L	96	h	SW	LC50	Mysidae
140669	113.1	ug/L	96	h	SW	LC50	Mysidae
140669	112.2	ug/L	96	h	SW	LC50	Mysidae
120821	0.49	AI mg/L	96	h	SW	LC50	Mysidae

## Sheet: Palaemonidae623
CASRN	Experimental Values	Unit	Test Time	Unit	Aquatic Environment	Endpoint	Data set
86500	0.52	ug/L	96	h	SW	LC50	Palaemonidae
95501	9400	ug/L	96	h	SW	LC50	Palaemonidae
72208	0.63	ug/L	96	h	SW	LC50	Palaemonidae
7778543	220	ug/L	96	h	SW	LC50	Palaemonidae
100027	18300	ug/L	96	h	SW	LC50	Palaemonidae
100027	16000	ug/L	96	h	SW	LC50	Palaemonidae
100027	15300	ug/L	96	h	SW	LC50	Palaemonidae
115093	31	ug/L	96	h	SW	LC50	Palaemonidae
7487947	116	ug/L	96	h	SW	LC50	Palaemonidae
86500	0.38	ug/L	96	h	SW	LC50	Palaemonidae
131522	10390	ug/L	96	h	SW	LC50	Palaemonidae
131522	84	ug/L	96	h	SW	LC50	Palaemonidae
131522	5090	ug/L	96	h	SW	LC50	Palaemonidae
131522	363	ug/L	96	h	SW	LC50	Palaemonidae
11097691	41	ug/L	96	h	SW	LC50	Palaemonidae
11097691	86	ug/L	96	h	SW	LC50	Palaemonidae
11097691	64	ug/L	96	h	SW	LC50	Palaemonidae
11097691	6.1	ug/L	96	h	SW	LC50	Palaemonidae
11097691	7.8	ug/L	96	h	SW	LC50	Palaemonidae
11097691	7.8	ug/L	96	h	SW	LC50	Palaemonidae
11097691	7.8	ug/L	96	h	SW	LC50	Palaemonidae
11097691	7.8	ug/L	96	h	SW	LC50	Palaemonidae
108952	5800	ug/L	96	h	SW	LC50	Palaemonidae
1330207	7400	ug/L	96	h	SW	LC50	Palaemonidae
91576	1100	ug/L	96	h	SW	LC50	Palaemonidae
108883	9500	ug/L	96	h	SW	LC50	Palaemonidae
91203	2350	ug/L	96	h	SW	LC50	Palaemonidae
28804888	700	ug/L	96	h	SW	LC50	Palaemonidae
25551137	5400	ug/L	96	h	SW	LC50	Palaemonidae
143500	120.9	ug/L	96	h	SW	LC50	Palaemonidae
71432	27000	ug/L	96	h	SW	LC50	Palaemonidae
143500	120	ug/L	96	h	SW	LC50	Palaemonidae
51158180	1000000	ug/L	96	h	SW	LC50	Palaemonidae
13863417	700	ug/L	96	h	SW	LC50	Palaemonidae
115297	1.31	ug/L	96	h	SW	LC50	Palaemonidae
151213	126500	ug/L	96	h	SW	LC50	Palaemonidae
151213	140000	ug/L	96	h	SW	LC50	Palaemonidae
151213	112500	ug/L	96	h	SW	LC50	Palaemonidae
151213	69000	ug/L	96	h	SW	LC50	Palaemonidae
151213	160000	ug/L	96	h	SW	LC50	Palaemonidae
151213	162000	ug/L	96	h	SW	LC50	Palaemonidae
151213	112000	ug/L	96	h	SW	LC50	Palaemonidae
151213	72000	ug/L	96	h	SW	LC50	Palaemonidae
151213	70000	ug/L	96	h	SW	LC50	Palaemonidae
151213	90000	ug/L	96	h	SW	LC50	Palaemonidae
151213	98000	ug/L	96	h	SW	LC50	Palaemonidae
151213	72000	ug/L	96	h	SW	LC50	Palaemonidae
151213	52000	ug/L	96	h	SW	LC50	Palaemonidae
151213	90000	ug/L	96	h	SW	LC50	Palaemonidae
151213	98000	ug/L	96	h	SW	LC50	Palaemonidae
151213	52500	ug/L	96	h	SW	LC50	Palaemonidae
151213	55000	ug/L	96	h	SW	LC50	Palaemonidae
142712	37	mg/L	96	h	SW	LC50	Palaemonidae
1600277	0.06	mg/L	96	h	SW	LC50	Palaemonidae
98884	180000	ug/L	96	h	SW	LC50	Palaemonidae
106467	69000	ug/L	96	h	SW	LC50	Palaemonidae
108463	42200	ug/L	96	h	SW	LC50	Palaemonidae
131522	2632	ug/L	96	h	SW	LC50	Palaemonidae
131522	2743	ug/L	96	h	SW	LC50	Palaemonidae
131522	436	ug/L	96	h	SW	LC50	Palaemonidae
13863417	600	ug/L	96	h	SW	LC50	Palaemonidae
131522	436	ug/L	96	h	SW	LC50	Palaemonidae
131522	649	ug/L	96	h	SW	LC50	Palaemonidae
100027	14300	ug/L	96	h	SW	LC50	Palaemonidae
100027	14000	ug/L	96	h	SW	LC50	Palaemonidae
100027	15000	ug/L	96	h	SW	LC50	Palaemonidae
86500	1.64	ug/L	96	h	SW	LC50	Palaemonidae
58718664	440	ug/L	96	h	SW	LC50	Palaemonidae
58718664	325	ug/L	96	h	SW	LC50	Palaemonidae
39450050	69	ug/L	96	h	SW	LC50	Palaemonidae
39450050	90	ug/L	96	h	SW	LC50	Palaemonidae
100027	14300	ug/L	96	h	SW	LC50	Palaemonidae
100027	16300	ug/L	96	h	SW	LC50	Palaemonidae
78342	285	ug/L	96	h	SW	LC50	Palaemonidae
12774300	1000000	ug/L	96	h	SW	LC50	Palaemonidae
7786347	69	ug/L	96	h	SW	LC50	Palaemonidae
115297	0.25	ug/L	96	h	SW	LC50	Palaemonidae
51285	31300	ug/L	96	h	SW	LC50	Palaemonidae
51285	26300	ug/L	96	h	SW	LC50	Palaemonidae
51285	26600	ug/L	96	h	SW	LC50	Palaemonidae
51285	49700	ug/L	96	h	SW	LC50	Palaemonidae
51285	36700	ug/L	96	h	SW	LC50	Palaemonidae
51285	31700	ug/L	96	h	SW	LC50	Palaemonidae
50293	2	ug/L	96	h	SW	LC50	Palaemonidae
7632000	8600	ug/L	96	h	SW	LC50	Palaemonidae
72208	1.8	ug/L	96	h	SW	LC50	Palaemonidae
131522	649	ug/L	96	h	SW	LC50	Palaemonidae
60571	50	ug/L	96	h	SW	LC50	Palaemonidae
62737	15	ug/L	96	h	SW	LC50	Palaemonidae
7487947	1040	ug/L	96	h	SW	LC50	Palaemonidae
58899	10	ug/L	96	h	SW	LC50	Palaemonidae
115297	0.25	ug/L	96	h	SW	LC50	Palaemonidae
115297	1.54	ug/L	96	h	SW	LC50	Palaemonidae
115297	0.39	ug/L	96	h	SW	LC50	Palaemonidae
51630581	0.04	ug/L	96	h	SW	LC50	Palaemonidae
51630581	0.044	ug/L	96	h	SW	LC50	Palaemonidae
51630581	0.024	ug/L	96	h	SW	LC50	Palaemonidae
51630581	0.071	ug/L	96	h	SW	LC50	Palaemonidae
51630581	0.043	ug/L	96	h	SW	LC50	Palaemonidae
51630581	0.024	ug/L	96	h	SW	LC50	Palaemonidae
51630581	0.02	ug/L	96	h	SW	LC50	Palaemonidae
51630581	0.007	ug/L	96	h	SW	LC50	Palaemonidae
10108642	760	ug/L	96	h	SW	LC50	Palaemonidae
13071799	4.6	ug/L	96	h	SW	LC50	Palaemonidae
12616352	74	ug/L	96	h	SW	LC50	Palaemonidae
51158215	940000	ug/L	96	h	SW	LC50	Palaemonidae
128030	17	ug/L	96	h	SW	LC50	Palaemonidae
128030	49	ug/L	96	h	SW	LC50	Palaemonidae
128030	80	ug/L	96	h	SW	LC50	Palaemonidae
309002	9	ug/L	96	h	SW	LC50	Palaemonidae
72435	12	ug/L	96	h	SW	LC50	Palaemonidae
298000	3	ug/L	96	h	SW	LC50	Palaemonidae
76448	440	ug/L	96	h	SW	LC50	Palaemonidae
16752775	49	ug/L	96	h	SW	LC50	Palaemonidae
151213	700000	ug/L	96	h	SW	LC50	Palaemonidae
39412516	40000	ug/L	96	h	SW	LC50	Palaemonidae
5064313	4100000	ug/L	96	h	SW	LC50	Palaemonidae
121755	82	ug/L	96	h	SW	LC50	Palaemonidae
52686	11.3	ug/L	96	h	SW	LC50	Palaemonidae
52686	7.7	ug/L	96	h	SW	LC50	Palaemonidae
52686	8.3	ug/L	96	h	SW	LC50	Palaemonidae
13071799	5.7	ug/L	96	h	SW	LC50	Palaemonidae
13071799	5.6	ug/L	96	h	SW	LC50	Palaemonidae
13071799	5	ug/L	96	h	SW	LC50	Palaemonidae
13071799	4.8	ug/L	96	h	SW	LC50	Palaemonidae
13071799	5.7	ug/L	96	h	SW	LC50	Palaemonidae
13071799	6.6	ug/L	96	h	SW	LC50	Palaemonidae
13071799	5	ug/L	96	h	SW	LC50	Palaemonidae
13071799	5.4	ug/L	96	h	SW	LC50	Palaemonidae
13071799	5.8	ug/L	96	h	SW	LC50	Palaemonidae
51158191	1050000	ug/L	96	h	SW	LC50	Palaemonidae
39278825	1000000	ug/L	96	h	SW	LC50	Palaemonidae
39403844	688000	ug/L	96	h	SW	LC50	Palaemonidae
72208	1.2	ug/L	96	h	SW	LC50	Palaemonidae
72208	0.35	ug/L	96	h	SW	LC50	Palaemonidae
72208	0.69	ug/L	96	h	SW	LC50	Palaemonidae
121755	9.06	ug/L	96	h	SW	LC50	Palaemonidae
121755	13.24	ug/L	96	h	SW	LC50	Palaemonidae
121755	38.19	ug/L	96	h	SW	LC50	Palaemonidae
8001352	4.4	ug/L	96	h	SW	LC50	Palaemonidae
87865	7500	ug/L	96	h	SW	LC50	Palaemonidae
95761	2500	ug/L	96	h	SW	LC50	Palaemonidae
7646857	50000	ug/L	96	h	SW	LC50	Palaemonidae
13071799	5.8	ug/L	96	h	SW	LC50	Palaemonidae
13071799	5.1	ug/L	96	h	SW	LC50	Palaemonidae
51285	21700	ug/L	96	h	SW	LC50	Palaemonidae
51285	23300	ug/L	96	h	SW	LC50	Palaemonidae
51285	26700	ug/L	96	h	SW	LC50	Palaemonidae
51285	25000	ug/L	96	h	SW	LC50	Palaemonidae
51285	27300	ug/L	96	h	SW	LC50	Palaemonidae
12789036	4.8	ug/L	96	h	SW	LC50	Palaemonidae
7487947	50	ug/L	96	h	SW	LC50	Palaemonidae
7487947	105	ug/L	96	h	SW	LC50	Palaemonidae
7487947	125	ug/L	96	h	SW	LC50	Palaemonidae
7487947	340	ug/L	96	h	SW	LC50	Palaemonidae
1262211	50	ug/L	96	h	SW	LC50	Palaemonidae
52315078	0.016	ug/L	96	h	SW	LC50	Palaemonidae
100027	14700	ug/L	96	h	SW	LC50	Palaemonidae
58899	4.44	ug/L	96	h	SW	LC50	Palaemonidae
7681529	52000	ug/L	96	h	SW	LC50	Palaemonidae
35367385	1.84	ug/L	96	h	SW	LC50	Palaemonidae
35367385	1.39	ug/L	96	h	SW	LC50	Palaemonidae
52686	7.1	ug/L	96	h	SW	LC50	Palaemonidae
35367385	1.34	ug/L	96	h	SW	LC50	Palaemonidae
35367385	1.34	ug/L	96	h	SW	LC50	Palaemonidae
35367385	1.63	ug/L	96	h	SW	LC50	Palaemonidae
35367385	1.07	ug/L	96	h	SW	LC50	Palaemonidae
35367385	1.99	ug/L	96	h	SW	LC50	Palaemonidae
35367385	1.809	ug/L	96	h	SW	LC50	Palaemonidae
35367385	337.3	ug/L	96	h	SW	LC50	Palaemonidae
35367385	269.3	ug/L	96	h	SW	LC50	Palaemonidae
35367385	185.5	ug/L	96	h	SW	LC50	Palaemonidae
35367385	14.9	ug/L	96	h	SW	LC50	Palaemonidae
35367385	3000	ug/L	96	h	SW	LC50	Palaemonidae
35367385	3800	ug/L	96	h	SW	LC50	Palaemonidae
35367385	3000	ug/L	96	h	SW	LC50	Palaemonidae
35367385	18140	ug/L	96	h	SW	LC50	Palaemonidae
52686	7.2	ug/L	96	h	SW	LC50	Palaemonidae
52686	6.5	ug/L	96	h	SW	LC50	Palaemonidae
10265926	0.004	ug/L	96	h	SW	LC50	Palaemonidae
10265926	0.00022	ug/L	96	h	SW	LC50	Palaemonidae
10265926	0.00038	ug/L	96	h	SW	LC50	Palaemonidae
1461229	31	ug/L	96	h	SW	LC50	Palaemonidae
10108642	2420	ug/L	96	h	SW	LC50	Palaemonidae
10108642	190	ug/L	96	h	SW	LC50	Palaemonidae
56359	20	ug/L	96	h	SW	LC50	Palaemonidae
120821	540	ug/L	96	h	SW	LC50	Palaemonidae
100027	11700	ug/L	96	h	SW	LC50	Palaemonidae
100027	13300	ug/L	96	h	SW	LC50	Palaemonidae
100027	12700	ug/L	96	h	SW	LC50	Palaemonidae
52686	8.3	ug/L	96	h	SW	LC50	Palaemonidae
52686	6.3	ug/L	96	h	SW	LC50	Palaemonidae
51630581	0.013	ug/L	96	h	SW	LC50	Palaemonidae
121755	10.43	ug/L	96	h	SW	LC50	Palaemonidae
56359	4.07	ug/L	96	h	SW	LC50	Palaemonidae
56359	31.41	ug/L	96	h	SW	LC50	Palaemonidae
52686	6.4	ug/L	96	h	SW	LC50	Palaemonidae
52686	8.4	ug/L	96	h	SW	LC50	Palaemonidae
52686	7	ug/L	96	h	SW	LC50	Palaemonidae
52686	7.2	ug/L	96	h	SW	LC50	Palaemonidae
51630581	0.044	ug/L	96	h	SW	LC50	Palaemonidae
51630581	0.027	ug/L	96	h	SW	LC50	Palaemonidae
51630581	0.041	ug/L	96	h	SW	LC50	Palaemonidae
51630581	0.028	ug/L	96	h	SW	LC50	Palaemonidae
51630581	0.045	ug/L	96	h	SW	LC50	Palaemonidae
51630581	0.028	ug/L	96	h	SW	LC50	Palaemonidae
51630581	0.036	ug/L	96	h	SW	LC50	Palaemonidae
51630581	0.032	ug/L	96	h	SW	LC50	Palaemonidae
51630581	0.042	ug/L	96	h	SW	LC50	Palaemonidae
51630581	0.029	ug/L	96	h	SW	LC50	Palaemonidae
51630581	0.024	ug/L	96	h	SW	LC50	Palaemonidae
51630581	0.041	ug/L	96	h	SW	LC50	Palaemonidae
51630581	0.056	ug/L	96	h	SW	LC50	Palaemonidae
51630581	0.05	ug/L	96	h	SW	LC50	Palaemonidae
51630581	0.06	ug/L	96	h	SW	LC50	Palaemonidae
51630581	0.038	ug/L	96	h	SW	LC50	Palaemonidae
51630581	0.033	ug/L	96	h	SW	LC50	Palaemonidae
51630581	0.043	ug/L	96	h	SW	LC50	Palaemonidae
86500	1.203	ug/L	96	h	SW	LC50	Palaemonidae
86500	1.19	ug/L	96	h	SW	LC50	Palaemonidae
86500	1.2	ug/L	96	h	SW	LC50	Palaemonidae
86500	1.092	ug/L	96	h	SW	LC50	Palaemonidae
86500	1.094	ug/L	96	h	SW	LC50	Palaemonidae
86500	1.02	ug/L	96	h	SW	LC50	Palaemonidae
86500	1.07	ug/L	96	h	SW	LC50	Palaemonidae
86500	1.05	ug/L	96	h	SW	LC50	Palaemonidae
86500	1.07	ug/L	96	h	SW	LC50	Palaemonidae
86500	0.932	ug/L	96	h	SW	LC50	Palaemonidae
86500	0.962	ug/L	96	h	SW	LC50	Palaemonidae
86500	0.93	ug/L	96	h	SW	LC50	Palaemonidae
86500	1.027	ug/L	96	h	SW	LC50	Palaemonidae
86500	0.964	ug/L	96	h	SW	LC50	Palaemonidae
86500	0.97	ug/L	96	h	SW	LC50	Palaemonidae
86500	1.016	ug/L	96	h	SW	LC50	Palaemonidae
86500	1.022	ug/L	96	h	SW	LC50	Palaemonidae
86500	1.02	ug/L	96	h	SW	LC50	Palaemonidae
115297	0.645	ug/L	96	h	SW	LC50	Palaemonidae
115297	0.641	ug/L	96	h	SW	LC50	Palaemonidae
115297	0.63	ug/L	96	h	SW	LC50	Palaemonidae
115297	0.337	ug/L	96	h	SW	LC50	Palaemonidae
115297	0.303	ug/L	96	h	SW	LC50	Palaemonidae
115297	0.39	ug/L	96	h	SW	LC50	Palaemonidae
115297	0.911	ug/L	96	h	SW	LC50	Palaemonidae
115297	0.894	ug/L	96	h	SW	LC50	Palaemonidae
115297	0.96	ug/L	96	h	SW	LC50	Palaemonidae
115297	1.397	ug/L	96	h	SW	LC50	Palaemonidae
115297	1.342	ug/L	96	h	SW	LC50	Palaemonidae
115297	1.4	ug/L	96	h	SW	LC50	Palaemonidae
115297	0.563	ug/L	96	h	SW	LC50	Palaemonidae
115297	0.513	ug/L	96	h	SW	LC50	Palaemonidae
115297	0.62	ug/L	96	h	SW	LC50	Palaemonidae
115297	0.583	ug/L	96	h	SW	LC50	Palaemonidae
115297	0.73	ug/L	96	h	SW	LC50	Palaemonidae
7440439	1.1	ug/L	96	h	SW	LC50	Palaemonidae
1912249	9000	ug/L	96	h	SW	LC50	Palaemonidae
115093	2420	ug/L	96	h	SW	LC50	Palaemonidae
115093	2490	ug/L	96	h	SW	LC50	Palaemonidae
7487947	2600	ug/L	96	h	SW	LC50	Palaemonidae
35367385	2000	ug/L	96	h	SW	LC50	Palaemonidae
35367385	2000	ug/L	96	h	SW	LC50	Palaemonidae
35367385	2000	ug/L	96	h	SW	LC50	Palaemonidae
35367385	1.11	ug/L	96	h	SW	LC50	Palaemonidae
35367385	2000	ug/L	96	h	SW	LC50	Palaemonidae
2921882	0.69	ug/L	96	h	SW	LC50	Palaemonidae
2921882	0.37	ug/L	96	h	SW	LC50	Palaemonidae
2921882	0.44	ug/L	96	h	SW	LC50	Palaemonidae
76448	1.06	ug/L	96	h	SW	LC50	Palaemonidae
12674112	12.5	ug/L	96	h	SW	LC50	Palaemonidae
82795388	86	ug/L	96	h	SW	LC50	Palaemonidae
82795388	127	ug/L	96	h	SW	LC50	Palaemonidae
82795388	169	ug/L	96	h	SW	LC50	Palaemonidae
60617063	0.084	%	96	h	SW	LC50	Palaemonidae
60617063	0.064	%	96	h	SW	LC50	Palaemonidae
12125029	3000	ug/L	96	h	SW	LC50	Palaemonidae
4901513	860	ug/L	96	h	SW	LC50	Palaemonidae
4901513	370	ug/L	96	h	SW	LC50	Palaemonidae
87865	2500	ug/L	96	h	SW	LC50	Palaemonidae
87865	440	ug/L	96	h	SW	LC50	Palaemonidae
88062	3950	ug/L	96	h	SW	LC50	Palaemonidae
88062	1210	ug/L	96	h	SW	LC50	Palaemonidae
95954	1120	ug/L	96	h	SW	LC50	Palaemonidae
95954	640	ug/L	96	h	SW	LC50	Palaemonidae
58902	3700	ug/L	96	h	SW	LC50	Palaemonidae
58902	810	ug/L	96	h	SW	LC50	Palaemonidae
935955	4100	ug/L	96	h	SW	LC50	Palaemonidae
935955	1170	ug/L	96	h	SW	LC50	Palaemonidae
25167811	2550	ug/L	96	h	SW	LC50	Palaemonidae
25167811	2160	ug/L	96	h	SW	LC50	Palaemonidae
319868	12.5	ug/L	96	h	SW	LC50	Palaemonidae
86500	1.34	ug/L	96	h	SW	LC50	Palaemonidae
64175	12390000	ug/L	4	d	SW	LC50	Palaemonidae
64175	12150000	ug/L	4	d	SW	LC50	Palaemonidae
64175	11600000	ug/L	4	d	SW	LC50	Palaemonidae
67641	5640000	ug/L	4	d	SW	LC50	Palaemonidae
67641	6350000	ug/L	4	d	SW	LC50	Palaemonidae
67641	8370000	ug/L	4	d	SW	LC50	Palaemonidae
67685	22680000	ug/L	4	d	SW	LC50	Palaemonidae
67685	24880000	ug/L	4	d	SW	LC50	Palaemonidae
67685	20150000	ug/L	4	d	SW	LC50	Palaemonidae
128030	50	ug/L	96	h	SW	LC50	Palaemonidae
128030	49	ug/L	96	h	SW	LC50	Palaemonidae
131522	2500	ug/L	96	h	SW	LC50	Palaemonidae
131522	400	ug/L	96	h	SW	LC50	Palaemonidae
7775113	14600	ug/L	96	h	SW	LC50	Palaemonidae
7775113	4900	ug/L	96	h	SW	LC50	Palaemonidae
82795388	141	ug/L	96	h	SW	LC50	Palaemonidae
82795388	127	ug/L	96	h	SW	LC50	Palaemonidae
110157932	0.07	%	96	h	SW	LC50	Palaemonidae
110157932	0.05	%	96	h	SW	LC50	Palaemonidae
53763136	0.085	%	96	h	SW	LC50	Palaemonidae
53763136	0.017	%	96	h	SW	LC50	Palaemonidae
7440439	4000	ug/L	96	h	SW	LC50	Palaemonidae
86500	1.06	ug/L	96	h	SW	LC50	Palaemonidae
86500	1.05	ug/L	96	h	SW	LC50	Palaemonidae
86500	1.05	ug/L	96	h	SW	LC50	Palaemonidae
115297	0.97	ug/L	96	h	SW	LC50	Palaemonidae
115297	0.96	ug/L	96	h	SW	LC50	Palaemonidae
115297	1.01	ug/L	96	h	SW	LC50	Palaemonidae
51630581	0.048	ug/L	96	h	SW	LC50	Palaemonidae
51630581	0.042	ug/L	96	h	SW	LC50	Palaemonidae
51630581	0.052	ug/L	96	h	SW	LC50	Palaemonidae
57749	18	ug/L	96	h	SW	LC50	Palaemonidae
57749	11	ug/L	96	h	SW	LC50	Palaemonidae
55389	5.3	ug/L	96	h	SW	LC50	Palaemonidae
55389	3	ug/L	96	h	SW	LC50	Palaemonidae
50293	0.86	ug/L	96	h	SW	LC50	Palaemonidae
50293	0.17	ug/L	96	h	SW	LC50	Palaemonidae
300765	15.4	ug/L	96	h	SW	LC50	Palaemonidae
300765	4.3	ug/L	96	h	SW	LC50	Palaemonidae
72208	4.7	ug/L	96	h	SW	LC50	Palaemonidae
72208	0.3	ug/L	96	h	SW	LC50	Palaemonidae
76448	14.5	ug/L	96	h	SW	LC50	Palaemonidae
121755	81.5	ug/L	96	h	SW	LC50	Palaemonidae
121755	9	ug/L	96	h	SW	LC50	Palaemonidae
72435	6.77	ug/L	96	h	SW	LC50	Palaemonidae
72435	0.44	ug/L	96	h	SW	LC50	Palaemonidae
56382	11.5	ug/L	96	h	SW	LC50	Palaemonidae
56382	17.8	ug/L	96	h	SW	LC50	Palaemonidae
63252	12	ug/L	96	h	SW	LC50	Palaemonidae
63252	7	ug/L	96	h	SW	LC50	Palaemonidae
72548	8.3	ug/L	96	h	SW	LC50	Palaemonidae
72548	1.6	ug/L	96	h	SW	LC50	Palaemonidae
8001352	20.3	ug/L	96	h	SW	LC50	Palaemonidae
8001352	20.8	ug/L	96	h	SW	LC50	Palaemonidae
115297	17.1	ug/L	96	h	SW	LC50	Palaemonidae
115297	3.4	ug/L	96	h	SW	LC50	Palaemonidae
3383968	2500	ug/L	96	h	SW	LC50	Palaemonidae
3383968	249	ug/L	96	h	SW	LC50	Palaemonidae
309002	0.74	ug/L	96	h	SW	LC50	Palaemonidae
309002	3	ug/L	96	h	SW	LC50	Palaemonidae
83329	0.54	mg/L	96	h	SW	LC50	Palaemonidae
120821	0.9	mg/L	96	h	SW	LC50	Palaemonidae
127184	1.3	mg/L	96	h	SW	LC50	Palaemonidae
60571	16.9	ug/L	96	h	SW	LC50	Palaemonidae
60571	6.9	ug/L	96	h	SW	LC50	Palaemonidae
105679	4800	ug/L	96	h	SW	LC50	Palaemonidae
151213	126.5	ppm	96	h	SW	LC50	Palaemonidae
151213	140	ppm	96	h	SW	LC50	Palaemonidae
151213	112.5	ppm	96	h	SW	LC50	Palaemonidae
151213	69	ppm	96	h	SW	LC50	Palaemonidae
151213	160	ppm	96	h	SW	LC50	Palaemonidae
151213	162	ppm	96	h	SW	LC50	Palaemonidae
151213	112	ppm	96	h	SW	LC50	Palaemonidae
151213	72	ppm	96	h	SW	LC50	Palaemonidae
151213	70	ppm	96	h	SW	LC50	Palaemonidae
151213	90	ppm	96	h	SW	LC50	Palaemonidae
151213	98	ppm	96	h	SW	LC50	Palaemonidae
151213	72	ppm	96	h	SW	LC50	Palaemonidae
151213	52	ppm	96	h	SW	LC50	Palaemonidae
151213	90	ppm	96	h	SW	LC50	Palaemonidae
151213	52.5	ppm	96	h	SW	LC50	Palaemonidae
151213	98	ppm	96	h	SW	LC50	Palaemonidae
151213	55	ppm	96	h	SW	LC50	Palaemonidae
71432	27	ppm	96	h	SW	LC50	Palaemonidae
25551137	5.4	ppm	96	h	SW	LC50	Palaemonidae
1330207	7.4	ppm	96	h	SW	LC50	Palaemonidae
108883	9.5	ppm	96	h	SW	LC50	Palaemonidae
91203	2.35	ppm	96	h	SW	LC50	Palaemonidae
91576	1.1	ppm	96	h	SW	LC50	Palaemonidae
28804888	0.71	ppm	96	h	SW	LC50	Palaemonidae
108952	5.8	ppm	96	h	SW	LC50	Palaemonidae
91203	2.4	ppm	96	h	SW	LC50	Palaemonidae
71432	27	ppm	96	h	SW	LC50	Palaemonidae
108883	9.5	ppm	96	h	SW	LC50	Palaemonidae
1330207	7.4	ppm	96	h	SW	LC50	Palaemonidae
95636	5.4	ppm	96	h	SW	LC50	Palaemonidae
91576	1.1	ppm	96	h	SW	LC50	Palaemonidae
581420	0.7	ppm	96	h	SW	LC50	Palaemonidae
143500	120.9	ug/L	96	h	SW	LC50	Palaemonidae
12616363	248	ug/L	96	h	SW	LC50	Palaemonidae
87865	515	ug/L	96	h	SW	LC50	Palaemonidae
7782505	220	ug/L	96	h	SW	LC50	Palaemonidae
7783064	51	ug/L	96	h	SW	LC50	Palaemonidae
84852153	59.4	ug/L	96	h	SW	LC50	Palaemonidae
206440	6.5	ug/L	96	h	SW	LC50	Palaemonidae
206440	142	ug/L	96	h	SW	LC50	Palaemonidae
206440	22	ug/L	96	h	SW	LC50	Palaemonidae
206440	3.3	ug/L	96	h	SW	LC50	Palaemonidae
206440	6.6	ug/L	96	h	SW	LC50	Palaemonidae
10099748	167	mg/L	96	h	SW	LC50	Palaemonidae
10099748	66.1	mg/L	96	h	SW	LC50	Palaemonidae
10108642	1.46	mg/L	96	h	SW	LC50	Palaemonidae
10108642	1.17	mg/L	96	h	SW	LC50	Palaemonidae
10108642	0.78	mg/L	96	h	SW	LC50	Palaemonidae
7646857	26.3	mg/L	96	h	SW	LC50	Palaemonidae
7646857	8.71	mg/L	96	h	SW	LC50	Palaemonidae
7487947	0.67	mg/L	96	h	SW	LC50	Palaemonidae
7487947	0.47	mg/L	96	h	SW	LC50	Palaemonidae
7487947	0.15	mg/L	96	h	SW	LC50	Palaemonidae
7447394	3.27	mg/L	96	h	SW	LC50	Palaemonidae
7447394	2.47	mg/L	96	h	SW	LC50	Palaemonidae
7447394	0.61	mg/L	96	h	SW	LC50	Palaemonidae
12125029	0.82	mg/L	96	h	SW	LC50	Palaemonidae
12125029	0.72	mg/L	96	h	SW	LC50	Palaemonidae
10108642	3.28	mg/L	96	h	SW	LC50	Palaemonidae
10108642	1.83	mg/L	96	h	SW	LC50	Palaemonidae
10108642	3.89	mg/L	96	h	SW	LC50	Palaemonidae
10108642	6.81	mg/L	96	h	SW	LC50	Palaemonidae
333415	2.8	ug/L	96	h	SW	LC50	Palaemonidae
10453868	0.53	ug/L	96	h	SW	LC50	Palaemonidae
10453868	0.35	ug/L	96	h	SW	LC50	Palaemonidae
111376591	2.08	ug/L	96	h	SW	LC50	Palaemonidae
111376591	0.36	ug/L	96	h	SW	LC50	Palaemonidae
7758987	2.52	mg/L	96	h	SW	LC50	Palaemonidae
7646857	12.3	mg/L	96	h	SW	LC50	Palaemonidae
10099748	5.88	mg/L	96	h	SW	LC50	Palaemonidae
62737	0.062	mg/L	96	h	SW	LC50	Palaemonidae
62737	0.057	mg/L	96	h	SW	LC50	Palaemonidae
7758987	16	mg/L	96	h	SW	LC50	Palaemonidae
1333820	6	mg/L	96	h	SW	LC50	Palaemonidae
120068373	0.32	ug/L	96	h	SW	LC50	Palaemonidae
120068373	0.68	ug/L	96	h	SW	LC50	Palaemonidae
120068373	0.68	ug/L	96	h	SW	LC50	Palaemonidae
101202	0.85	mg/L	96	h	SW	LC50	Palaemonidae
66230044	0.06	ug/L	96	h	SW	LC50	Palaemonidae
2921882	0.16	ug/L	96	h	SW	LC50	Palaemonidae
128030	49	ppb	96	h	SW	LC50	Palaemonidae
72490018	0.92	mg/L	96	h	SW	LC50	Palaemonidae
82795388	127	ppb	96	h	SW	LC50	Palaemonidae
52645531	0.21	ug/L	96	h	SW	LC50	Palaemonidae
52645531	0.05	ug/L	96	h	SW	LC50	Palaemonidae
52645531	6.4	ug/L	96	h	SW	LC50	Palaemonidae
138261413	308.8	ug/L	96	h	SW	LC50	Palaemonidae
138261413	563.5	ug/L	96	h	SW	LC50	Palaemonidae
1912249	10000	ug/L	96	h	SW	LC50	Palaemonidae
86500	1.05	ug/L	96	h	SW	LC50	Palaemonidae
115297	1.01	ug/L	96	h	SW	LC50	Palaemonidae
51630581	0.052	ug/L	96	h	SW	LC50	Palaemonidae
86500	0.86	ug/L	96	h	SW	LC50	Palaemonidae
8002059	2.4	ml/L	96	h	SW	LC50	Palaemonidae
8002059	3.15	mg/L	96	h	SW	LC50	Palaemonidae
8002059	2.1	mg/L	96	h	SW	LC50	Palaemonidae
8002059	2.8	mg/L	96	h	SW	LC50	Palaemonidae
115297	2.56	ug/L	96	h	SW	LC50	Palaemonidae
115297	117	ug/L	96	h	SW	LC50	Palaemonidae
115297	1.99	ug/L	96	h	SW	LC50	Palaemonidae
115297	0.28	ug/L	96	h	SW	LC50	Palaemonidae
115297	0.18	ug/L	96	h	SW	LC50	Palaemonidae
115297	0.18	ug/L	96	h	SW	LC50	Palaemonidae
115297	0.12	ug/L	96	h	SW	LC50	Palaemonidae
8002059	2.25	mg/L	96	h	SW	LC50	Palaemonidae
8002059	6.8	mg/L	96	h	SW	LC50	Palaemonidae
8002059	5.14	mg/L	96	h	SW	LC50	Palaemonidae
115297	0.62	ug/L	96	h	SW	LC50	Palaemonidae
115297	0.92	ug/L	96	h	SW	LC50	Palaemonidae
85007	1624	ug/L	96	h	SW	LC50	Palaemonidae
63252	43.02	ug/L	96	h	SW	LC50	Palaemonidae
206440	32.45	ug/L	96	h	SW	LC50	Palaemonidae
82657043	0.02	ug/L	96	h	SW	LC50	Palaemonidae
82657043	0.013	ug/L	96	h	SW	LC50	Palaemonidae
63252	22	ug/L	96	h	SW	LC50	Palaemonidae
28159980	1.52	mg/L	96	h	SW	LC50	Palaemonidae
28159980	2.46	mg/L	96	h	SW	LC50	Palaemonidae
7758987	0.064	ppm	96	h	SW	LC50	Palaemonidae
87683	32	ug/L	96	h	SW	LC50	Palaemonidae
77474	42	ug/L	96	h	SW	LC50	Palaemonidae
51036	888.6	ug/L	96	h	SW	LC50	Palaemonidae
51036	1043	ug/L	96	h	SW	LC50	Palaemonidae
51036	814.4	ug/L	96	h	SW	LC50	Palaemonidae
206440	2.35	ug/L	96	h	SW	LC50	Palaemonidae
50328	1.02	ug/L	96	h	SW	LC50	Palaemonidae
80844071	1.26	ug/L	96	h	SW	LC50	Palaemonidae
80844071	0.89	ug/L	96	h	SW	LC50	Palaemonidae
80844071	100	ug/L	96	h	SW	LC50	Palaemonidae
5436431	23.6	ug/L	96	h	SW	LC50	Palaemonidae
5436431	78.07	ug/L	96	h	SW	LC50	Palaemonidae
115297	0.779	ug/L	96	h	SW	LC50	Palaemonidae
115297	2.117	ug/L	96	h	SW	LC50	Palaemonidae
786196	4.6	ug/L	96	h	SW	LC50	Palaemonidae
786196	2	ug/L	96	h	SW	LC50	Palaemonidae
786196	2.9	ug/L	96	h	SW	LC50	Palaemonidae
78488	22	ug/L	96	h	SW	LC50	Palaemonidae
1897456	152.9	ug/L	96	h	SW	LC50	Palaemonidae
1897456	49.54	ug/L	96	h	SW	LC50	Palaemonidae
1897456	396	ug/L	96	h	SW	LC50	Palaemonidae
1897456	177.7	ug/L	4	d	SW	LC50	Palaemonidae
1897456	49.09	ug/L	96	h	SW	LC50	Palaemonidae
1897456	39.4	ug/L	96	h	SW	LC50	Palaemonidae
1897456	156	ug/L	96	h	SW	LC50	Palaemonidae
1897456	116.2	ug/L	96	h	SW	LC50	Palaemonidae
1897456	32.62	ug/L	96	h	SW	LC50	Palaemonidae
1897456	44.36	ug/L	96	h	SW	LC50	Palaemonidae
111376591	1.35	ug/L	96	h	SW	LC50	Palaemonidae
111376591	1.64	ug/L	96	h	SW	LC50	Palaemonidae
111376591	1.22	ug/L	96	h	SW	LC50	Palaemonidae
111376591	2.1	ug/L	96	h	SW	LC50	Palaemonidae
111376591	0.99	ug/L	96	h	SW	LC50	Palaemonidae
111376591	0.86	ug/L	96	h	SW	LC50	Palaemonidae
10453868	0.43	ug/L	96	h	SW	LC50	Palaemonidae
82657043	0.019	ug/L	96	h	SW	LC50	Palaemonidae
302578967	0.37	ug/L	96	h	SW	LC50	Palaemonidae
302578978	0.32	ug/L	96	h	SW	LC50	Palaemonidae
120068373	0.32	ug/L	96	h	SW	LC50	Palaemonidae
302578967	0.54	ug/L	96	h	SW	LC50	Palaemonidae
302578978	0.35	ug/L	96	h	SW	LC50	Palaemonidae
120068373	0.68	ug/L	96	h	SW	LC50	Palaemonidae
26002802	0.161	ug/L	96	h	SW	LC50	Palaemonidae
26002802	0.154	ug/L	96	h	SW	LC50	Palaemonidae
26002802	19.55	ug/L	96	h	SW	LC50	Palaemonidae
1928434	1.4	ppb	96	h	SW	LC50	Palaemonidae
16672870	490	ppm	96	h	SW	LC50	Palaemonidae
2312358	101	ppb	96	h	SW	LC50	Palaemonidae
20354261	13.4	ppm	96	h	SW	LC50	Palaemonidae
38641940	281	ppm	96	h	SW	LC50	Palaemonidae
10311849	3.56	ppb	96	h	SW	LC50	Palaemonidae
3337711	100	ppm	96	h	SW	LC50	Palaemonidae
82027596	1000	ppm	96	h	SW	LC50	Palaemonidae
53516760	2.81	ppm	96	h	SW	LC50	Palaemonidae
16752775	130	ppb	96	h	SW	LC50	Palaemonidae
69377817	120	ppm	96	h	SW	LC50	Palaemonidae
145701219	123	ppm	96	h	SW	LC50	Palaemonidae
23564058	35.2	ppm	96	h	SW	LC50	Palaemonidae
142596	0.179	ppm	96	h	SW	LC50	Palaemonidae
13194484	56.4	ppb	96	h	SW	LC50	Palaemonidae
28249776	380	ppb	96	h	SW	LC50	Palaemonidae
120945	980	ppm	96	h	SW	LC50	Palaemonidae
5902512	56.4	ppm	96	h	SW	LC50	Palaemonidae
7758998	17	ppm	96	h	SW	LC50	Palaemonidae
35367385	0.64	ppb	96	h	SW	LC50	Palaemonidae
58366	50	ppb	96	h	SW	LC50	Palaemonidae
39148248	3.6	ppm	96	h	SW	LC50	Palaemonidae
23135220	2.9	ppm	96	h	SW	LC50	Palaemonidae
1928434	0.14	ppm	96	h	SW	LC50	Palaemonidae
145701231	120	ppm	96	h	SW	LC50	Palaemonidae
81406373	135	ppb	96	h	SW	LC50	Palaemonidae
19044883	3.11	ppm	96	h	SW	LC50	Palaemonidae
1918009	100	ppm	96	h	SW	LC50	Palaemonidae
1582098	638.5	ppb	96	h	SW	LC50	Palaemonidae
7758998	17	ppm	96	h	SW	LC50	Palaemonidae
33089611	65.1	ppm	96	h	SW	LC50	Palaemonidae
35691657	45	ppm	96	h	SW	LC50	Palaemonidae
57213691	326	ppm	96	h	SW	LC50	Palaemonidae
64700567	1.7	ppm	96	h	SW	LC50	Palaemonidae
64700567	2.48	ppm	96	h	SW	LC50	Palaemonidae
173159574	92.7	ppm	96	h	SW	LC50	Palaemonidae
42874033	32	ppb	96	h	SW	LC50	Palaemonidae
1929824	3.1	ppm	96	h	SW	LC50	Palaemonidae
40596698	10	ppm	96	h	SW	LC50	Palaemonidae
2921882	83000	ppb	96	h	SW	LC50	Palaemonidae
23422539	2.5	ppm	96	h	SW	LC50	Palaemonidae
145733	85.1	ppm	96	h	SW	LC50	Palaemonidae
9007390	115	ppm	96	h	SW	LC50	Palaemonidae
98967409	349	ppm	96	h	SW	LC50	Palaemonidae
69327760	0.55	ppm	96	h	SW	LC50	Palaemonidae
51235042	78	ppm	96	h	SW	LC50	Palaemonidae
16752775	49	ppb	96	h	SW	LC50	Palaemonidae
533744	0.3	ppm	96	h	SW	LC50	Palaemonidae
62476599	446	ppm	96	h	SW	LC50	Palaemonidae
115297	1.3	ppb	96	h	SW	LC50	Palaemonidae
4080313	128	ppm	96	h	SW	LC50	Palaemonidae
17804352	45.8	ppm	96	h	SW	LC50	Palaemonidae
68187633	147	ppm	96	h	SW	LC50	Palaemonidae
16079882	13.8	ppm	96	h	SW	LC50	Palaemonidae
143500	121	ppb	96	h	SW	LC50	Palaemonidae
59669260	0.0596	ppm	96	h	SW	LC50	Palaemonidae
35691657	45	ppm	96	h	SW	LC50	Palaemonidae
122008859	1.21	ppm	96	h	SW	LC50	Palaemonidae
147150354	121	ppm	96	h	SW	LC50	Palaemonidae
122145	2	ppb	96	h	SW	LC50	Palaemonidae
300765	9.3	ppb	96	h	SW	LC50	Palaemonidae
82558507	1	ppm	96	h	SW	LC50	Palaemonidae
72490018	2.2	ppm	96	h	SW	LC50	Palaemonidae
82027596	68	ppm	96	h	SW	LC50	Palaemonidae
12125018	75.3	mg/L	96	h	SW	LC50	Palaemonidae
98884	180	mg/L	96	h	SW	LC50	Palaemonidae
142712	37	mg/L	96	h	SW	LC50	Palaemonidae
95501	10	mg/L	96	h	SW	LC50	Palaemonidae
106467	60	mg/L	96	h	SW	LC50	Palaemonidae
1600277	0.06	mg/L	96	h	SW	LC50	Palaemonidae
592858	0.09	mg/L	96	h	SW	LC50	Palaemonidae
108463	42.2	mg/L	96	h	SW	LC50	Palaemonidae
7681529	52	mg/L	96	h	SW	LC50	Palaemonidae
2058460	683.3	mg/L	96	h	SW	LC50	Palaemonidae
10588019	4.86	ppm	96	h	SW	LC50	Palaemonidae
115297	1.02	ug/L	96	h	SW	LC50	Palaemonidae
115297	0.513	ug/L	96	h	SW	LC50	Palaemonidae
115297	0.367	ug/L	96	h	SW	LC50	Palaemonidae
115297	0.551	ug/L	96	h	SW	LC50	Palaemonidae
2921882	0.69	ug/L	96	h	SW	LC50	Palaemonidae
333415	0.277	mg/L	96	h	SW	LC50	Palaemonidae
60207901	0.611	mg/L	96	h	SW	LC50	Palaemonidae
52918635	48.4	ng/L	96	h	SW	LC50	Palaemonidae
52918635	5.04	ng/L	96	h	SW	LC50	Palaemonidae
52918635	5.8	ng/L	96	h	SW	LC50	Palaemonidae
91465086	6.24	ng/L	96	h	SW	LC50	Palaemonidae
91465086	11.44	ng/L	96	h	SW	LC50	Palaemonidae
52315078	19.08	ng/L	96	h	SW	LC50	Palaemonidae
52315078	21.2	ng/L	96	h	SW	LC50	Palaemonidae
52645531	50	ng/L	96	h	SW	LC50	Palaemonidae
52645531	112.7	ng/L	96	h	SW	LC50	Palaemonidae
12125029	2.57	mg/L	96	h	SW	LC50	Palaemonidae
300765	16	ug/L	96	h	SW	LC50	Palaemonidae
87865	2500	ug/L	96	h	SW	LC50	Palaemonidae
87865	440	ug/L	96	h	SW	LC50	Palaemonidae
151213	23.4	ppm	96	h	SW	LC50	Palaemonidae
70288867	54	ug/L	96	h	SW	LC50	Palaemonidae
1344678	2.15	mg/L	4	d	SW	LC50	Palaemonidae
329895	0.31	mg/ml	4	d	SW	LC50	Palaemonidae
1344678	0.75	mg/L	4	d	SW	LC50	Palaemonidae
1344678	2.56	mg/L	4	d	SW	LC50	Palaemonidae
329895	0.22	mg/ml	4	d	SW	LC50	Palaemonidae
329895	0.11	mg/ml	4	d	SW	LC50	Palaemonidae
118741	17	ug/L	96	h	SW	LC50	Palaemonidae

## Sheet: Penaeidae467
CASRN	Experimental Values	Unit	Test Time	Unit	Aquatic Environment	Endpoint	Data set
72208	0.037	ug/L	96	h	SW	LC50	Penaeidae
115297	0.04	ug/L	96	h	SW	LC50	Penaeidae
91576	600	ug/L	96	h	SW	LC50	Penaeidae
91203	2500	ug/L	96	h	SW	LC50	Penaeidae
28804888	80	ug/L	96	h	SW	LC50	Penaeidae
950356	13.6	ug/L	96	h	SW	LC50	Penaeidae
298000	1.9	ug/L	96	h	SW	LC50	Penaeidae
21609905	1.88	ug/L	96	h	SW	LC50	Penaeidae
2104645	0.29	ug/L	96	h	SW	LC50	Penaeidae
7664417	24880	ug/L	96	h	SW	LC50	Penaeidae
7664417	29770	ug/L	96	h	SW	LC50	Penaeidae
1303339	40.6	mg/L	96	h	SW	LC50	Penaeidae
100447	3900	ug/L	96	h	SW	LC50	Penaeidae
42615292	5450	ug/L	96	h	SW	LC50	Penaeidae
75252	26000	ug/L	96	h	SW	LC50	Penaeidae
67663	81.5	mg/L	96	h	SW	LC50	Penaeidae
56359	11	ug/L	96	h	SW	LC50	Penaeidae
7440508	380	ug/L	96	h	SW	LC50	Penaeidae
55389	0.11	ug/L	96	h	SW	LC50	Penaeidae
16752775	19	ug/L	96	h	SW	LC50	Penaeidae
72435	3.5	ug/L	96	h	SW	LC50	Penaeidae
10108642	4600	ug/L	96	h	SW	LC50	Penaeidae
8001352	1.4	ug/L	96	h	SW	LC50	Penaeidae
298000	1.2	ug/L	96	h	SW	LC50	Penaeidae
7745893	10800	ug/L	96	h	SW	LC50	Penaeidae
2545600	125000	ug/L	96	h	SW	LC50	Penaeidae
2545600	1230000	ug/L	96	h	SW	LC50	Penaeidae
50293	37	ug/L	96	h	SW	LC50	Penaeidae
87865	5600	ug/L	96	h	SW	LC50	Penaeidae
12772064	19500	ug/L	96	h	SW	LC50	Penaeidae
7632000	13550	ug/L	96	h	SW	LC50	Penaeidae
70124775	0.22	ug/L	96	h	SW	LC50	Penaeidae
51630581	0.84	ug/L	96	h	SW	LC50	Penaeidae
52645531	0.22	ug/L	96	h	SW	LC50	Penaeidae
12789036	0.4	ug/L	96	h	SW	LC50	Penaeidae
608731	0.34	ug/L	96	h	SW	LC50	Penaeidae
58899	0.17	ug/L	96	h	SW	LC50	Penaeidae
7487947	15.3	ug/L	96	h	SW	LC50	Penaeidae
7681494	1118000	ug/L	96	h	SW	LC50	Penaeidae
10108642	2070	ug/L	96	h	SW	LC50	Penaeidae
13171216	1534	ug/L	96	h	SW	LC50	Penaeidae
13171216	928	ug/L	96	h	SW	LC50	Penaeidae
115297	26.32	ug/L	96	h	SW	LC50	Penaeidae
115297	0.13	ug/L	96	h	SW	LC50	Penaeidae
12125029	1330	ug/L	96	h	SW	LC50	Penaeidae
12125029	11510	ug/L	96	h	SW	LC50	Penaeidae
121755	392	ug/L	96	h	SW	LC50	Penaeidae
121755	214	ug/L	96	h	SW	LC50	Penaeidae
12125029	23700	ug/L	96	h	SW	LC50	Penaeidae
59756604	4600	ug/L	96	h	SW	LC50	Penaeidae
59756604	2400	ug/L	96	h	SW	LC50	Penaeidae
86500	120	ug/L	96	h	SW	LC50	Penaeidae
12125029	40310	ug/L	96	h	SW	LC50	Penaeidae
7632000	37710	ug/L	96	h	SW	LC50	Penaeidae
12125029	37000	ug/L	96	h	SW	LC50	Penaeidae
7664417	38870	ug/L	96	h	SW	LC50	Penaeidae
7664417	42440	ug/L	96	h	SW	LC50	Penaeidae
7664417	28180	ug/L	96	h	SW	LC50	Penaeidae
10102440	40860	ug/L	96	h	SW	LC50	Penaeidae
10102440	38520	ug/L	96	h	SW	LC50	Penaeidae
7487947	0.00151	ug/L	96	h	SW	LC50	Penaeidae
7778509	3.44	ug/L	96	h	SW	LC50	Penaeidae
108952	8.32	ug/L	96	h	SW	LC50	Penaeidae
108952	2.7	ug/L	96	h	SW	LC50	Penaeidae
1327533	2.85	ug/L	96	h	SW	LC50	Penaeidae
1327533	2.43	ug/L	96	h	SW	LC50	Penaeidae
7487947	20	ug/L	96	h	SW	LC50	Penaeidae
7487947	35	ug/L	96	h	SW	LC50	Penaeidae
7733020	600	ug/L	96	h	SW	LC50	Penaeidae
7733020	1700	ug/L	96	h	SW	LC50	Penaeidae
7758987	840	ug/L	96	h	SW	LC50	Penaeidae
7758987	2250	ug/L	96	h	SW	LC50	Penaeidae
108907	1720	ug/L	96	h	SW	LC50	Penaeidae
100005	2140	ug/L	96	h	SW	LC50	Penaeidae
7758987	10116	ug/L	96	h	SW	LC50	Penaeidae
9016459	100000	ug/L	96	h	SW	LC50	Penaeidae
9016459	100000	ug/L	96	h	SW	LC50	Penaeidae
42615292	3740	ug/L	96	h	SW	LC50	Penaeidae
12125029	6800	ug/L	96	h	SW	LC50	Penaeidae
12125029	8100	ug/L	96	h	SW	LC50	Penaeidae
12125029	6100	ug/L	96	h	SW	LC50	Penaeidae
12125029	10600	ug/L	96	h	SW	LC50	Penaeidae
12125029	10900	ug/L	96	h	SW	LC50	Penaeidae
12125029	9400	ug/L	96	h	SW	LC50	Penaeidae
12125029	15500	ug/L	96	h	SW	LC50	Penaeidae
12125029	52700	ug/L	96	h	SW	LC50	Penaeidae
12125029	19100	ug/L	96	h	SW	LC50	Penaeidae
1912249	6900	ug/L	96	h	SW	LC50	Penaeidae
52645531	0.17	ug/L	96	h	SW	LC50	Penaeidae
10108642	509	ug/L	96	h	SW	LC50	Penaeidae
7447394	832	ug/L	96	h	SW	LC50	Penaeidae
7646857	1050	ug/L	96	h	SW	LC50	Penaeidae
333415	21	ug/L	96	h	SW	LC50	Penaeidae
55389	0.21	ug/L	96	h	SW	LC50	Penaeidae
121755	12	ug/L	96	h	SW	LC50	Penaeidae
52315078	0.11	ug/L	96	h	SW	LC50	Penaeidae
51630581	0.012	ug/L	96	h	SW	LC50	Penaeidae
42615292	5850	ug/L	96	h	SW	LC50	Penaeidae
76448	0.11	ug/L	96	h	SW	LC50	Penaeidae
1024573	0.04	ug/L	96	h	SW	LC50	Penaeidae
76448	0.03	ug/L	96	h	SW	LC50	Penaeidae
75252	26000	ug/L	96	h	SW	LC50	Penaeidae
12674112	10.5	ug/L	96	h	SW	LC50	Penaeidae
7758987	408.3	ug/L	96	h	SW	LC50	Penaeidae
7778509	3703	ug/L	96	h	SW	LC50	Penaeidae
7487947	6.71	ug/L	96	h	SW	LC50	Penaeidae
60617063	42000	ug/L	96	h	SW	LC50	Penaeidae
60617063	41000	ug/L	96	h	SW	LC50	Penaeidae
39403844	1600000	ug/L	96	h	SW	LC50	Penaeidae
39403844	1500000	ug/L	96	h	SW	LC50	Penaeidae
151213	16400	ug/L	96	h	SW	LC50	Penaeidae
151213	11600	ug/L	96	h	SW	LC50	Penaeidae
7783064	35.2	ug/L	96	h	SW	LC50	Penaeidae
51222403	984000	ug/L	96	h	SW	LC50	Penaeidae
51222403	984000	ug/L	96	h	SW	LC50	Penaeidae
63252	24.87	ug/L	96	h	SW	LC50	Penaeidae
58899	5.5	ug/L	96	h	SW	LC50	Penaeidae
58899	5.5	ug/L	96	h	SW	LC50	Penaeidae
58899	5.8	ug/L	96	h	SW	LC50	Penaeidae
58899	6.3	ug/L	96	h	SW	LC50	Penaeidae
60571	38.5	ug/L	96	h	SW	LC50	Penaeidae
60571	39.2	ug/L	96	h	SW	LC50	Penaeidae
60571	37.5	ug/L	96	h	SW	LC50	Penaeidae
60571	42.4	ug/L	96	h	SW	LC50	Penaeidae
63252	24.3	ug/L	96	h	SW	LC50	Penaeidae
63252	24.6	ug/L	96	h	SW	LC50	Penaeidae
63252	22.5	ug/L	96	h	SW	LC50	Penaeidae
63252	28.2	ug/L	96	h	SW	LC50	Penaeidae
301122	1170	ug/L	96	h	SW	LC50	Penaeidae
301122	1280	ug/L	96	h	SW	LC50	Penaeidae
301122	1050	ug/L	96	h	SW	LC50	Penaeidae
301122	1660	ug/L	96	h	SW	LC50	Penaeidae
60515	2310	ug/L	96	h	SW	LC50	Penaeidae
60515	2470	ug/L	96	h	SW	LC50	Penaeidae
60515	2080	ug/L	96	h	SW	LC50	Penaeidae
60515	2860	ug/L	96	h	SW	LC50	Penaeidae
121755	1360	ug/L	96	h	SW	LC50	Penaeidae
121755	1520	ug/L	96	h	SW	LC50	Penaeidae
121755	1120	ug/L	96	h	SW	LC50	Penaeidae
121755	1930	ug/L	96	h	SW	LC50	Penaeidae
13171216	1080	ug/L	96	h	SW	LC50	Penaeidae
13171216	1100	ug/L	96	h	SW	LC50	Penaeidae
13171216	1060	ug/L	96	h	SW	LC50	Penaeidae
13171216	1320	ug/L	96	h	SW	LC50	Penaeidae
62737	794	ug/L	96	h	SW	LC50	Penaeidae
62737	875	ug/L	96	h	SW	LC50	Penaeidae
62737	898	ug/L	96	h	SW	LC50	Penaeidae
62737	980	ug/L	96	h	SW	LC50	Penaeidae
298000	95	ug/L	96	h	SW	LC50	Penaeidae
298000	105	ug/L	96	h	SW	LC50	Penaeidae
298000	64	ug/L	96	h	SW	LC50	Penaeidae
298000	185	ug/L	96	h	SW	LC50	Penaeidae
2597037	12	ug/L	96	h	SW	LC50	Penaeidae
2597037	12	ug/L	96	h	SW	LC50	Penaeidae
2597037	17	ug/L	96	h	SW	LC50	Penaeidae
2597037	15	ug/L	96	h	SW	LC50	Penaeidae
122145	2.1	ug/L	96	h	SW	LC50	Penaeidae
122145	2.7	ug/L	96	h	SW	LC50	Penaeidae
122145	2.9	ug/L	96	h	SW	LC50	Penaeidae
122145	3	ug/L	96	h	SW	LC50	Penaeidae
56382	1120	ug/L	96	h	SW	LC50	Penaeidae
56382	1160	ug/L	96	h	SW	LC50	Penaeidae
56382	1090	ug/L	96	h	SW	LC50	Penaeidae
56382	1350	ug/L	96	h	SW	LC50	Penaeidae
309002	32	ug/L	96	h	SW	LC50	Penaeidae
309002	32.4	ug/L	96	h	SW	LC50	Penaeidae
309002	29.5	ug/L	96	h	SW	LC50	Penaeidae
309002	35.3	ug/L	96	h	SW	LC50	Penaeidae
50293	58	ug/L	96	h	SW	LC50	Penaeidae
50293	62	ug/L	96	h	SW	LC50	Penaeidae
50293	69	ug/L	96	h	SW	LC50	Penaeidae
50293	63	ug/L	96	h	SW	LC50	Penaeidae
7664417	9390	ug/L	96	h	SW	LC50	Penaeidae
7664417	21980	ug/L	96	h	SW	LC50	Penaeidae
7664417	5490	ug/L	96	h	SW	LC50	Penaeidae
7447394	1	ug/L	96	h	SW	LC50	Penaeidae
7447394	5	ug/L	96	h	SW	LC50	Penaeidae
7447394	20	ug/L	96	h	SW	LC50	Penaeidae
7447394	20	ug/L	96	h	SW	LC50	Penaeidae
7447394	1450	ug/L	96	h	SW	LC50	Penaeidae
7447394	2050	ug/L	96	h	SW	LC50	Penaeidae
7447394	1200	ug/L	96	h	SW	LC50	Penaeidae
7447394	1000	ug/L	96	h	SW	LC50	Penaeidae
121755	21.46	ug/L	96	h	SW	LC50	Penaeidae
7664417	11950	ug/L	96	h	SW	LC50	Penaeidae
7664417	6890	ug/L	96	h	SW	LC50	Penaeidae
7664417	10820	ug/L	96	h	SW	LC50	Penaeidae
7664417	15470	ug/L	96	h	SW	LC50	Penaeidae
7664417	52650	ug/L	96	h	SW	LC50	Penaeidae
13746662	9100	ug/L	96	h	SW	LC50	Penaeidae
13746662	2700	ug/L	96	h	SW	LC50	Penaeidae
143339	110	ug/L	96	h	SW	LC50	Penaeidae
7783202	12000	ug/L	96	h	SW	LC50	Penaeidae
12125029	9.39	mg/L	96	h	SW	LC50	Penaeidae
12125029	21.98	mg/L	96	h	SW	LC50	Penaeidae
12125029	5.49	mg/L	96	h	SW	LC50	Penaeidae
12125029	38.72	mg/L	96	h	SW	LC50	Penaeidae
12125029	42.49	mg/L	96	h	SW	LC50	Penaeidae
133272421	5370	ug/L	96	h	SW	LC50	Penaeidae
7783064	144	ug/L	96	h	SW	LC50	Penaeidae
7783064	281	ug/L	96	h	SW	LC50	Penaeidae
7783064	342	ug/L	96	h	SW	LC50	Penaeidae
7783064	119	ug/L	96	h	SW	LC50	Penaeidae
7783064	189	ug/L	96	h	SW	LC50	Penaeidae
7783064	63	ug/L	96	h	SW	LC50	Penaeidae
7783064	117	ug/L	96	h	SW	LC50	Penaeidae
7783064	340	ug/L	96	h	SW	LC50	Penaeidae
7783064	378	ug/L	96	h	SW	LC50	Penaeidae
7783064	147	ug/L	96	h	SW	LC50	Penaeidae
7783064	219	ug/L	96	h	SW	LC50	Penaeidae
7783064	77	ug/L	96	h	SW	LC50	Penaeidae
7783064	125	ug/L	96	h	SW	LC50	Penaeidae
10108642	990	ug/L	96	h	SW	LC50	Penaeidae
7646857	43870	ug/L	96	h	SW	LC50	Penaeidae
115322	151	ug/L	96	h	SW	LC50	Penaeidae
12125029	65200	ug/L	96	h	SW	LC50	Penaeidae
12125029	70900	ug/L	96	h	SW	LC50	Penaeidae
7632000	109400	ug/L	96	h	SW	LC50	Penaeidae
7632000	2171700	ug/L	96	h	SW	LC50	Penaeidae
12125029	34360	ug/L	96	h	SW	LC50	Penaeidae
10108642	238	ug/L	96	h	SW	LC50	Penaeidae
10108642	284	ug/L	96	h	SW	LC50	Penaeidae
10108642	316	ug/L	96	h	SW	LC50	Penaeidae
10108642	198	ug/L	96	h	SW	LC50	Penaeidae
10108642	563	ug/L	96	h	SW	LC50	Penaeidae
10108642	3405	ug/L	96	h	SW	LC50	Penaeidae
56359	19.4	ug/L	96	h	SW	LC50	Penaeidae
56359	93.6	ug/L	96	h	SW	LC50	Penaeidae
56359	370	ug/L	96	h	SW	LC50	Penaeidae
56359	328	ug/L	96	h	SW	LC50	Penaeidae
7733020	1668.16	ug/L	96	h	SW	LC50	Penaeidae
121755	59.59	ug/L	96	h	SW	LC50	Penaeidae
15498870	1200	ug/L	96	h	SW	LC50	Penaeidae
12616363	7.5	ug/L	96	h	SW	LC50	Penaeidae
7440508	18	ug/L	96	h	SW	LC50	Penaeidae
7440666	48	ug/L	96	h	SW	LC50	Penaeidae
7440439	33	ug/L	96	h	SW	LC50	Penaeidae
7439921	174	ug/L	96	h	SW	LC50	Penaeidae
87865	195	ug/L	96	h	SW	LC50	Penaeidae
12125029	12.2	mg/L	96	h	SW	LC50	Penaeidae
301042	7.223	ppm	96	h	SW	LC50	Penaeidae
301042	7.22	ppm	96	h	SW	LC50	Penaeidae
301042	5.45	ppm	96	h	SW	LC50	Penaeidae
301042	4.77	ppm	96	h	SW	LC50	Penaeidae
301042	6.84	ppm	96	h	SW	LC50	Penaeidae
301042	4.65	ppm	96	h	SW	LC50	Penaeidae
301042	5.18	ppm	96	h	SW	LC50	Penaeidae
12125029	55.84	mg/L	96	h	SW	LC50	Penaeidae
12125029	36.01	mg/L	96	h	SW	LC50	Penaeidae
12125029	26.72	mg/L	96	h	SW	LC50	Penaeidae
12125029	11.44	mg/L	96	h	SW	LC50	Penaeidae
13746662	60800	ug/L	96	h	SW	LC50	Penaeidae
13746662	2410	ug/L	96	h	SW	LC50	Penaeidae
7758987	2.535	mg/L	96	h	SW	LC50	Penaeidae
7447394	37	mg/L	96	h	SW	LC50	Penaeidae
7758987	1.4	ppm	96	h	SW	LC50	Penaeidae
298022	0.27	ug/L	96	h	SW	LC50	Penaeidae
298022	0.11	ug/L	96	h	SW	LC50	Penaeidae
30560191	10000	ug/L	96	h	SW	LC50	Penaeidae
30560191	3800	ug/L	96	h	SW	LC50	Penaeidae
10265926	1.46	mg/L	96	h	SW	LC50	Penaeidae
121755	1.48	mg/L	96	h	SW	LC50	Penaeidae
298000	0.12	mg/L	96	h	SW	LC50	Penaeidae
101202	99	ug/L	96	h	SW	LC50	Penaeidae
298000	1.2	ug/L	96	h	SW	LC50	Penaeidae
298000	1.4	ug/L	96	h	SW	LC50	Penaeidae
298000	1.56	ug/g	96	h	SW	LC50	Penaeidae
116063	72	ug/L	96	h	SW	LC50	Penaeidae
116063	12	ug/L	96	h	SW	LC50	Penaeidae
56359	9.1	ppb	96	h	SW	LC50	Penaeidae
56359	7.6	ppb	96	h	SW	LC50	Penaeidae
56359	9.1	ppb	96	h	SW	LC50	Penaeidae
56359	7.6	ppb	96	h	SW	LC50	Penaeidae
10108642	0.18	mg/L	96	h	SW	LC50	Penaeidae
7733020	0.31	mg/L	96	h	SW	LC50	Penaeidae
13194484	6.4	ug/L	96	h	SW	LC50	Penaeidae
13194484	13	ug/L	96	h	SW	LC50	Penaeidae
7440439	1.07	mg/L	96	h	SW	LC50	Penaeidae
7440666	1.35	mg/L	96	h	SW	LC50	Penaeidae
7733020	2.15	mg/L	96	h	SW	LC50	Penaeidae
8002059	100	%	96	h	SW	LC50	Penaeidae
8002059	30	%	96	h	SW	LC50	Penaeidae
8002059	38	%	96	h	SW	LC50	Penaeidae
8002059	33	%	96	h	SW	LC50	Penaeidae
8002059	100	%	96	h	SW	LC50	Penaeidae
8002059	30	%	96	h	SW	LC50	Penaeidae
8002059	38	%	96	h	SW	LC50	Penaeidae
7487947	0.03	mg/L	96	h	SW	LC50	Penaeidae
7487947	0.16	mg/L	96	h	SW	LC50	Penaeidae
10108642	0.15	mg/L	96	h	SW	LC50	Penaeidae
10108642	1.1	mg/L	96	h	SW	LC50	Penaeidae
7447394	0.72	mg/L	96	h	SW	LC50	Penaeidae
7733020	0.37	mg/L	96	h	SW	LC50	Penaeidae
7733020	1.2	mg/L	96	h	SW	LC50	Penaeidae
7718549	6.6	mg/L	96	h	SW	LC50	Penaeidae
7718549	21	mg/L	96	h	SW	LC50	Penaeidae
10099748	80	mg/L	96	h	SW	LC50	Penaeidae
10099748	195	mg/L	96	h	SW	LC50	Penaeidae
10099748	51	mg/L	96	h	SW	LC50	Penaeidae
7487947	0.07	mg/L	96	h	SW	LC50	Penaeidae
10108642	0.37	mg/L	96	h	SW	LC50	Penaeidae
7447394	0.21	mg/L	96	h	SW	LC50	Penaeidae
7733020	0.5	mg/L	96	h	SW	LC50	Penaeidae
7718549	6.9	mg/L	96	h	SW	LC50	Penaeidae
7718549	3.55	mg/L	96	h	SW	LC50	Penaeidae
7487947	0.03	mg/L	96	h	SW	LC50	Penaeidae
7487947	0.29	mg/L	96	h	SW	LC50	Penaeidae
7447394	0.9	mg/L	96	h	SW	LC50	Penaeidae
7718549	2.8	mg/L	96	h	SW	LC50	Penaeidae
10099748	31	mg/L	96	h	SW	LC50	Penaeidae
10099748	30	mg/L	96	h	SW	LC50	Penaeidae
10099748	36.5	mg/L	96	h	SW	LC50	Penaeidae
7773015	130	mg/L	96	h	SW	LC50	Penaeidae
7646857	2.08	mg/L	96	h	SW	LC50	Penaeidae
7705080	44.2	mg/L	96	h	SW	LC50	Penaeidae
10108642	3.1191	mg/L	96	h	SW	LC50	Penaeidae
122145	0.8	ug/L	96	h	SW	LC50	Penaeidae
122145	0.4	ug/L	96	h	SW	LC50	Penaeidae
115322	0.108	ppm	96	h	SW	LC50	Penaeidae
115322	0.156	ppm	96	h	SW	LC50	Penaeidae
8002059	35	%	96	h	SW	LC50	Penaeidae
8002059	80	%	96	h	SW	LC50	Penaeidae
8002059	100	%	96	h	SW	LC50	Penaeidae
7487947	0.13	mg/L	96	h	SW	LC50	Penaeidae
10108642	1.2	mg/L	96	h	SW	LC50	Penaeidae
10108642	0.65	mg/L	96	h	SW	LC50	Penaeidae
10108642	1.85	mg/L	96	h	SW	LC50	Penaeidae
7447394	0.35	mg/L	96	h	SW	LC50	Penaeidae
7447394	0.53	mg/L	96	h	SW	LC50	Penaeidae
7447394	6.1	mg/L	96	h	SW	LC50	Penaeidae
7733020	0.5	mg/L	96	h	SW	LC50	Penaeidae
7733020	4.8	mg/L	96	h	SW	LC50	Penaeidae
7733020	6.2231	mg/L	96	h	SW	LC50	Penaeidae
301042	7.223	mg/L	96	h	SW	LC50	Penaeidae
7733020	3.5	ppm	96	h	SW	LC50	Penaeidae
122145	0.2	ug/L	96	h	SW	LC50	Penaeidae
122145	0.5	ug/L	96	h	SW	LC50	Penaeidae
7664417	35.59	mg/L	96	h	SW	LC50	Penaeidae
7440508	0.5	mg/L	96	h	SW	LC50	Penaeidae
7440439	0.048	mg/L	96	h	SW	LC50	Penaeidae
7440439	1.7	mg/L	96	h	SW	LC50	Penaeidae
7440508	0.012	mg/L	96	h	SW	LC50	Penaeidae
7440508	1.2	mg/L	96	h	SW	LC50	Penaeidae
7664417	73	mg/L	96	h	SW	LC50	Penaeidae
7758987	5	mg/L	96	h	SW	LC50	Penaeidae
7758987	35.12	mg/L	96	h	SW	LC50	Penaeidae
7758987	0.22	mg/L	96	h	SW	LC50	Penaeidae
10108642	1.31	mg/L	96	h	SW	LC50	Penaeidae
7789006	2.71	mg/L	96	h	SW	LC50	Penaeidae
7758987	3.13	mg/L	96	h	SW	LC50	Penaeidae
7758987	7.73	mg/L	96	h	SW	LC50	Penaeidae
7631994	1449	mg/L	96	h	SW	LC50	Penaeidae
7631994	1575	mg/L	96	h	SW	LC50	Penaeidae
7631994	2316	mg/L	96	h	SW	LC50	Penaeidae
12125029	26.3	mg/L	96	h	SW	LC50	Penaeidae
12125029	37.4	mg/L	96	h	SW	LC50	Penaeidae
786196	4.3	ug/L	96	h	SW	LC50	Penaeidae
786196	0.47	ug/L	96	h	SW	LC50	Penaeidae
78488	25	ug/L	96	h	SW	LC50	Penaeidae
78488	14	ug/L	96	h	SW	LC50	Penaeidae
2104645	4.6	ug/L	96	h	SW	LC50	Penaeidae
2104645	0.29	ug/L	96	h	SW	LC50	Penaeidae
7758987	0.8204	ppm	96	h	SW	LC50	Penaeidae
52645531	0.51	ppb	96	h	SW	LC50	Penaeidae
5742176	605	ppm	96	h	SW	LC50	Penaeidae
108731700	212	ppm	96	h	SW	LC50	Penaeidae
81334341	189	ppm	96	h	SW	LC50	Penaeidae
51630581	2	ppb	96	h	SW	LC50	Penaeidae
28249776	310	ppb	96	h	SW	LC50	Penaeidae
28249776	470	ppb	96	h	SW	LC50	Penaeidae
59756604	2.4	ppm	96	h	SW	LC50	Penaeidae
82666	33	ppm	96	h	SW	LC50	Penaeidae
1344816	106	ppb	96	h	SW	LC50	Penaeidae
15299997	19.9	ppm	96	h	SW	LC50	Penaeidae
51200874	230	ppm	96	h	SW	LC50	Penaeidae
2545600	1230	ppm	96	h	SW	LC50	Penaeidae
28249776	570	ppb	96	h	SW	LC50	Penaeidae
999815	804	ppm	96	h	SW	LC50	Penaeidae
301122	1.2	ppm	96	h	SW	LC50	Penaeidae
2439998	254	ppm	96	h	SW	LC50	Penaeidae
5234684	14	ppm	96	h	SW	LC50	Penaeidae
40487421	1.6	ppm	96	h	SW	LC50	Penaeidae
10453868	1.2	ppb	96	h	SW	LC50	Penaeidae
1563662	13.3	ppb	96	h	SW	LC50	Penaeidae
16752775	19	ppb	96	h	SW	LC50	Penaeidae
61791637	1000	ppm	96	h	SW	LC50	Penaeidae
2545600	125	ppm	96	h	SW	LC50	Penaeidae
82666	10	ppm	96	h	SW	LC50	Penaeidae
64359815	27.2	ppb	96	h	SW	LC50	Penaeidae
1897456	165	ppb	96	h	SW	LC50	Penaeidae
1563662	7.23	ppb	96	h	SW	LC50	Penaeidae
69806504	6	ppm	96	h	SW	LC50	Penaeidae
94746	236	ppm	96	h	SW	LC50	Penaeidae
7758998	16	ppm	96	h	SW	LC50	Penaeidae
3383968	11.9	ppb	96	h	SW	LC50	Penaeidae
56359	11	ppb	96	h	SW	LC50	Penaeidae
61791648	9.76	ppm	96	h	SW	LC50	Penaeidae
1983104	12.7	ppb	96	h	SW	LC50	Penaeidae
10453868	1.3	ppb	96	h	SW	LC50	Penaeidae
50000	143	ppm	96	h	SW	LC50	Penaeidae
88857	1960	ppb	96	h	SW	LC50	Penaeidae
13121705	1.4	ppb	96	h	SW	LC50	Penaeidae
69806344	572	ppm	96	h	SW	LC50	Penaeidae
333415	21	ppb	96	h	SW	LC50	Penaeidae
40487421	11	ppm	96	h	SW	LC50	Penaeidae
5742198	99.6	ppm	96	h	SW	LC50	Penaeidae
41814782	32	ppm	96	h	SW	LC50	Penaeidae
18584797	1057	ppm	96	h	SW	LC50	Penaeidae
4080313	182	ppm	96	h	SW	LC50	Penaeidae
94757	467	ppm	96	h	SW	LC50	Penaeidae
61791648	2390	ppb	96	h	SW	LC50	Penaeidae
52645531	0.34	ppb	96	h	SW	LC50	Penaeidae
26172554	2.3	ppm	96	h	SW	LC50	Penaeidae
50000	358	ppm	96	h	SW	LC50	Penaeidae
81406373	128	ppb	96	h	SW	LC50	Penaeidae
2039465	301	ppm	96	h	SW	LC50	Penaeidae
59756604	4.54	ppm	96	h	SW	LC50	Penaeidae
50000	7.6	ppm	96	h	SW	LC50	Penaeidae
115297	0.04	ppb	96	h	SW	LC50	Penaeidae
122349	113	ppm	96	h	SW	LC50	Penaeidae
21087649	48.27	ppm	96	h	SW	LC50	Penaeidae
51630581	1.4	ppb	96	h	SW	LC50	Penaeidae
52315078	0.036	ppb	96	h	SW	LC50	Penaeidae
52645531	0.35	ppb	96	h	SW	LC50	Penaeidae
41198087	4.6	ppb	96	h	SW	LC50	Penaeidae
10222012	2.4	ppm	96	h	SW	LC50	Penaeidae
57213691	895	ppm	96	h	SW	LC50	Penaeidae
15096523	14	ppm	96	h	SW	LC50	Penaeidae
58138082	0.14	ppm	96	h	SW	LC50	Penaeidae
563122	15	ppb	96	h	SW	LC50	Penaeidae
7747355	138	ppm	96	h	SW	LC50	Penaeidae
87865	5600	ppb	96	h	SW	LC50	Penaeidae
1224510295	0.16	ug/L	96	h	SW	LC50	Penaeidae
1224510295	0.16	ug/L	96	h	SW	LC50	Penaeidae
1224510295	0.19	ug/L	96	h	SW	LC50	Penaeidae
1224510295	0.43	ug/L	96	h	SW	LC50	Penaeidae
1224510295	0.37	ug/L	96	h	SW	LC50	Penaeidae
1224510295	0.35	ug/L	96	h	SW	LC50	Penaeidae
30560191	17.6	mg/L	96	h	SW	LC50	Penaeidae
30560191	19.54	mg/L	96	h	SW	LC50	Penaeidae
30560191	17.6	mg/L	96	h	SW	LC50	Penaeidae
30560191	24.49	mg/L	96	h	SW	LC50	Penaeidae
30560191	28.52	mg/L	96	h	SW	LC50	Penaeidae
30560191	29	mg/L	96	h	SW	LC50	Penaeidae
10043353	87.85	mg/L	96	h	SW	LC50	Penaeidae
10043353	79.17	mg/L	96	h	SW	LC50	Penaeidae
10043353	79.17	mg/L	96	h	SW	LC50	Penaeidae
333415	0.226	mg/L	96	h	SW	LC50	Penaeidae
60207901	3.635	mg/L	96	h	SW	LC50	Penaeidae
10108642	1.32	mg/L	96	h	SW	LC50	Penaeidae
7447394	0.95	mg/L	96	h	SW	LC50	Penaeidae
10099748	0.39	mg/L	96	h	SW	LC50	Penaeidae
7733020	2.74	mg/L	96	h	SW	LC50	Penaeidae
300765	6.6	ug/L	96	h	SW	LC50	Penaeidae
7487947	0.016	mg/L	96	h	SW	LC50	Penaeidae
7487947	0.017	mg/L	96	h	SW	LC50	Penaeidae
7487947	0.018	mg/L	96	h	SW	LC50	Penaeidae
7487947	0.03	mg/L	96	h	SW	LC50	Penaeidae
7487947	0.034	mg/L	96	h	SW	LC50	Penaeidae
7487947	0.036	mg/L	96	h	SW	LC50	Penaeidae
7487947	0.024	mg/L	96	h	SW	LC50	Penaeidae
7487947	0.026	mg/L	96	h	SW	LC50	Penaeidae
7487947	0.029	mg/L	96	h	SW	LC50	Penaeidae
7487947	0.034	mg/L	96	h	SW	LC50	Penaeidae
7487947	0.039	mg/L	96	h	SW	LC50	Penaeidae
7487947	0.042	mg/L	96	h	SW	LC50	Penaeidae
118741	25	ug/L	96	h	SW	LC50	Penaeidae

## Sheet: Amphipoda397
CASRN	Experimental Values	Unit	Test Time	Unit	Aquatic Environment	Endpoint	Data set
91203	2680	ug/L	96	h	SW	LC50	Amphipoda
95487	10200	ug/L	96	h	SW	LC50	Amphipoda
95534	40000	ug/L	96	h	SW	LC50	Amphipoda
95636	4350	ug/L	96	h	SW	LC50	Amphipoda
40596698	2150	ug/L	96	h	SW	LC50	Amphipoda
40596698	1950	ug/L	96	h	SW	LC50	Amphipoda
7646857	1900	ug/L	96	h	SW	LC50	Amphipoda
7487947	20	ug/L	96	h	SW	LC50	Amphipoda
12774300	10000000	ug/L	96	h	SW	LC50	Amphipoda
7681529	145	ug/L	96	h	SW	LC50	Amphipoda
7681529	687	ug/L	96	h	SW	LC50	Amphipoda
11097691	9	ug/L	96	h	SW	LC50	Amphipoda
7758954	5000	ug/L	96	h	SW	LC50	Amphipoda
87865	371	ug/L	96	h	SW	LC50	Amphipoda
117817	1000	ug/L	96	h	SW	LC50	Amphipoda
96184	45*	ug/L	96	h	SW	LC50	Amphipoda
108952	89500	ug/L	96	h	SW	LC50	Amphipoda
108952	183200	ug/L	96	h	SW	LC50	Amphipoda
7281041	NR	ug/L	96	h	SW	LC50	Amphipoda
139071	100	ug/L	96	h	SW	LC50	Amphipoda
107642	NR	ug/L	96	h	SW	LC50	Amphipoda
50293	NR	ug/L	96	h	SW	LC50	Amphipoda
87865	550	ug/L	96	h	SW	LC50	Amphipoda
87865	450	ug/L	96	h	SW	LC50	Amphipoda
95761	3200	ug/L	96	h	SW	LC50	Amphipoda
95761	4000	ug/L	96	h	SW	LC50	Amphipoda
1313822	200	ug/L	96	h	SW	LC50	Amphipoda
1313822	1000	ug/L	96	h	SW	LC50	Amphipoda
7758987	110	ug/L	96	h	SW	LC50	Amphipoda
7758987	500	ug/L	96	h	SW	LC50	Amphipoda
7487947	80	ug/L	96	h	SW	LC50	Amphipoda
7778509	5560	ug/L	96	h	SW	LC50	Amphipoda
7778509	6340	ug/L	96	h	SW	LC50	Amphipoda
7718549	34680	ug/L	96	h	SW	LC50	Amphipoda
10108642	780	ug/L	96	h	SW	LC50	Amphipoda
7758987	480	ug/L	96	h	SW	LC50	Amphipoda
7447394	600	ug/L	96	h	SW	LC50	Amphipoda
10108642	680	ug/L	96	h	SW	LC50	Amphipoda
1327533	1100	ug/L	96	h	SW	LC50	Amphipoda
60571	6	ug/L	96	h	SW	LC50	Amphipoda
60571	30	ug/L	96	h	SW	LC50	Amphipoda
7646857	2000	ug/L	96	h	SW	LC50	Amphipoda
7778509	5000	ug/L	96	h	SW	LC50	Amphipoda
7778509	8000	ug/L	96	h	SW	LC50	Amphipoda
7778509	15000	ug/L	96	h	SW	LC50	Amphipoda
7778509	17000	ug/L	96	h	SW	LC50	Amphipoda
7778509	36000	ug/L	96	h	SW	LC50	Amphipoda
7718549	5000	ug/L	96	h	SW	LC50	Amphipoda
7718549	21000	ug/L	96	h	SW	LC50	Amphipoda
7718549	18000	ug/L	96	h	SW	LC50	Amphipoda
7718549	36000	ug/L	96	h	SW	LC50	Amphipoda
7718549	54000	ug/L	96	h	SW	LC50	Amphipoda
7718549	8000	ug/L	96	h	SW	LC50	Amphipoda
7718549	15000	ug/L	96	h	SW	LC50	Amphipoda
7718549	22000	ug/L	96	h	SW	LC50	Amphipoda
7718549	24000	ug/L	96	h	SW	LC50	Amphipoda
7718549	52000	ug/L	96	h	SW	LC50	Amphipoda
7718549	5600	ug/L	96	h	SW	LC50	Amphipoda
7718549	16000	ug/L	96	h	SW	LC50	Amphipoda
7718549	18000	ug/L	96	h	SW	LC50	Amphipoda
7718549	22000	ug/L	96	h	SW	LC50	Amphipoda
7718549	34000	ug/L	96	h	SW	LC50	Amphipoda
7733020	1000	ug/L	96	h	SW	LC50	Amphipoda
7733020	4600	ug/L	96	h	SW	LC50	Amphipoda
7733020	6500	ug/L	96	h	SW	LC50	Amphipoda
7733020	12000	ug/L	96	h	SW	LC50	Amphipoda
7733020	16000	ug/L	96	h	SW	LC50	Amphipoda
7733020	1600	ug/L	96	h	SW	LC50	Amphipoda
7733020	8500	ug/L	96	h	SW	LC50	Amphipoda
7733020	11000	ug/L	96	h	SW	LC50	Amphipoda
7733020	15000	ug/L	96	h	SW	LC50	Amphipoda
7733020	1100	ug/L	96	h	SW	LC50	Amphipoda
7733020	3200	ug/L	96	h	SW	LC50	Amphipoda
7733020	3400	ug/L	96	h	SW	LC50	Amphipoda
7733020	4400	ug/L	96	h	SW	LC50	Amphipoda
7733020	3600	ug/L	96	h	SW	LC50	Amphipoda
7778509	2300	ug/L	96	h	SW	LC50	Amphipoda
7778509	5800	ug/L	96	h	SW	LC50	Amphipoda
7778509	120000	ug/L	96	h	SW	LC50	Amphipoda
7778509	20000	ug/L	96	h	SW	LC50	Amphipoda
7778509	25000	ug/L	96	h	SW	LC50	Amphipoda
7778509	25000	ug/L	96	h	SW	LC50	Amphipoda
7778509	36000	ug/L	96	h	SW	LC50	Amphipoda
7778509	38000	ug/L	96	h	SW	LC50	Amphipoda
7778509	4400	ug/L	96	h	SW	LC50	Amphipoda
7778509	6000	ug/L	96	h	SW	LC50	Amphipoda
7778509	4700	ug/L	96	h	SW	LC50	Amphipoda
7778509	9500	ug/L	96	h	SW	LC50	Amphipoda
7778509	5800	ug/L	96	h	SW	LC50	Amphipoda
7778509	2200	ug/L	96	h	SW	LC50	Amphipoda
7778509	38000	ug/L	96	h	SW	LC50	Amphipoda
7778509	40000	ug/L	96	h	SW	LC50	Amphipoda
7778509	36000	ug/L	96	h	SW	LC50	Amphipoda
1461229	1.3	ug/L	96	h	SW	LC50	Amphipoda
1461229	5.3	ug/L	96	h	SW	LC50	Amphipoda
10108642	240	ug/L	96	h	SW	LC50	Amphipoda
10108642	1270	ug/L	96	h	SW	LC50	Amphipoda
10108642	630	ug/L	96	h	SW	LC50	Amphipoda
7784465	14000	ug/L	96	h	SW	LC50	Amphipoda
7784465	40000	ug/L	96	h	SW	LC50	Amphipoda
7784465	36000	ug/L	96	h	SW	LC50	Amphipoda
7784465	42000	ug/L	96	h	SW	LC50	Amphipoda
7784465	58000	ug/L	96	h	SW	LC50	Amphipoda
7784465	7000	ug/L	96	h	SW	LC50	Amphipoda
7784465	16000	ug/L	96	h	SW	LC50	Amphipoda
7784465	15000	ug/L	96	h	SW	LC50	Amphipoda
7784465	17000	ug/L	96	h	SW	LC50	Amphipoda
7784465	16000	ug/L	96	h	SW	LC50	Amphipoda
7784465	7500	ug/L	96	h	SW	LC50	Amphipoda
7784465	5600	ug/L	96	h	SW	LC50	Amphipoda
7784465	7500	ug/L	96	h	SW	LC50	Amphipoda
7784465	6000	ug/L	96	h	SW	LC50	Amphipoda
7784465	6000	ug/L	96	h	SW	LC50	Amphipoda
10108642	1170	ug/L	96	h	SW	LC50	Amphipoda
10108642	190	ug/L	96	h	SW	LC50	Amphipoda
84742	450	ug/L	96	h	SW	LC50	Amphipoda
120821	1100	ug/L	96	h	SW	LC50	Amphipoda
51630581	0.07	ug/L	96	h	SW	LC50	Amphipoda
87865	82	ug/L	96	h	SW	LC50	Amphipoda
10108642	1.6	umol/L	96	h	SW	LC50	Amphipoda
10108642	300	ug/L	96	h	SW	LC50	Amphipoda
7778509	11000	ug/L	96	h	SW	LC50	Amphipoda
10108642	41.9	ug/L	4	d	SW	LC50	Amphipoda
10108642	36.1	ug/L	4	d	SW	LC50	Amphipoda
10108642	14.5	ug/L	4	d	SW	LC50	Amphipoda
1461229	138	ug/L	4	d	SW	LC50	Amphipoda
1461229	173	ug/L	4	d	SW	LC50	Amphipoda
1461229	51	ug/L	4	d	SW	LC50	Amphipoda
7631892	8000	ug/L	96	h	SW	LC50	Amphipoda
7631892	8460	ug/L	96	h	SW	LC50	Amphipoda
7631892	4160	ug/L	96	h	SW	LC50	Amphipoda
7631892	5110	ug/L	96	h	SW	LC50	Amphipoda
2921882	0.39	ug/L	96	h	SW	LC50	Amphipoda
1461229	138	ug/L	4	d	SW	LC50	Amphipoda
1461229	1.5	ug/L	4	d	SW	LC50	Amphipoda
10099748	620	ug/L	96	h	SW	LC50	Amphipoda
10108642	2900	ug/L	96	h	SW	LC50	Amphipoda
10108642	400	ug/L	96	h	SW	LC50	Amphipoda
10108642	280	ug/L	96	h	SW	LC50	Amphipoda
10108642	580	ug/L	96	h	SW	LC50	Amphipoda
10108642	200	ug/L	96	h	SW	LC50	Amphipoda
10108642	3500	ug/L	96	h	SW	LC50	Amphipoda
10108642	13300	ug/L	96	h	SW	LC50	Amphipoda
10108642	870	ug/L	96	h	SW	LC50	Amphipoda
7439921	14100	ug/L	96	h	SW	LC50	Amphipoda
50293	2	ug/L	96	h	SW	LC50	Amphipoda
10108642	900	ug/L	96	h	SW	LC50	Amphipoda
7447394	250	ug/L	96	h	SW	LC50	Amphipoda
7758954	10000	ug/L	96	h	SW	LC50	Amphipoda
7487947	20	ug/L	96	h	SW	LC50	Amphipoda
7778509	3400	ug/L	96	h	SW	LC50	Amphipoda
1327533	2750	ug/L	96	h	SW	LC50	Amphipoda
10108642	570	ug/L	96	h	SW	LC50	Amphipoda
7664417	78700	ug/L	96	h	SW	LC50	Amphipoda
7664417	125500	ug/L	96	h	SW	LC50	Amphipoda
7664417	126700	ug/L	96	h	SW	LC50	Amphipoda
7664417	49800	ug/L	96	h	SW	LC50	Amphipoda
7664417	148300	ug/L	96	h	SW	LC50	Amphipoda
7664417	154700	ug/L	96	h	SW	LC50	Amphipoda
7440439	530	ug/L	96	h	SW	LC50	Amphipoda
7440439	1920	ug/L	96	h	SW	LC50	Amphipoda
7440439	3140	ug/L	96	h	SW	LC50	Amphipoda
7440439	1320	ug/L	96	h	SW	LC50	Amphipoda
12125029	44400	ug/L	96	h	SW	LC50	Amphipoda
12125029	88900	ug/L	96	h	SW	LC50	Amphipoda
10108642	NR	ug/L	96	h	SW	LC50	Amphipoda
10108642	NR	ug/L	96	h	SW	LC50	Amphipoda
10108642	NR	ug/L	96	h	SW	LC50	Amphipoda
10108642	NR	ug/L	96	h	SW	LC50	Amphipoda
10108642	NR	ug/L	96	h	SW	LC50	Amphipoda
10108642	20	ug/L	96	h	SW	LC50	Amphipoda
10108642	NR	ug/L	96	h	SW	LC50	Amphipoda
10108642	20	ug/L	96	h	SW	LC50	Amphipoda
10108642	NR	ug/L	96	h	SW	LC50	Amphipoda
10108642	NR	ug/L	96	h	SW	LC50	Amphipoda
10108642	NR	ug/L	96	h	SW	LC50	Amphipoda
10108642	40	ug/L	96	h	SW	LC50	Amphipoda
10108642	40	ug/L	96	h	SW	LC50	Amphipoda
10108642	1480	ug/L	96	h	SW	LC50	Amphipoda
10108642	1100	ug/L	96	h	SW	LC50	Amphipoda
10108642	470	ug/L	96	h	SW	LC50	Amphipoda
10108642	760	ug/L	96	h	SW	LC50	Amphipoda
10108642	410	ug/L	96	h	SW	LC50	Amphipoda
10108642	290	ug/L	96	h	SW	LC50	Amphipoda
108952	66500	ug/L	96	h	SW	LC50	Amphipoda
10108642	1510	ug/L	4	d	SW	LC50	Amphipoda
10108642	12510	ug/L	4	d	SW	LC50	Amphipoda
10108642	1450	ug/L	4	d	SW	LC50	Amphipoda
10108642	340	ug/L	4	d	SW	LC50	Amphipoda
10108642	960	ug/L	4	d	SW	LC50	Amphipoda
206440	70	ug/L	4	d	SW	LC50	Amphipoda
206440	70	ug/L	4	d	SW	LC50	Amphipoda
206440	98	ug/L	4	d	SW	LC50	Amphipoda
206440	36	ug/L	4	d	SW	LC50	Amphipoda
206440	85	ug/L	4	d	SW	LC50	Amphipoda
53469219	10	ug/L	96	h	SW	LC50	Amphipoda
11097691	40	ug/L	96	h	SW	LC50	Amphipoda
10108642	190	ug/L	96	h	SW	LC50	Amphipoda
10108642	670	ug/L	96	h	SW	LC50	Amphipoda
10108642	90	ug/L	96	h	SW	LC50	Amphipoda
10108642	560	ug/L	96	h	SW	LC50	Amphipoda
10108642	20	ug/L	96	h	SW	LC50	Amphipoda
10108642	6420	ug/L	96	h	SW	LC50	Amphipoda
10108642	270	ug/L	96	h	SW	LC50	Amphipoda
10108642	60	ug/L	96	h	SW	LC50	Amphipoda
10108642	250	ug/L	96	h	SW	LC50	Amphipoda
10108642	280	ug/L	96	h	SW	LC50	Amphipoda
7447394	9	ug/L	96	h	SW	LC50	Amphipoda
7447394	28.5	ug/L	96	h	SW	LC50	Amphipoda
10108642	360	ug/L	96	h	SW	LC50	Amphipoda
10108642	650	ug/L	96	h	SW	LC50	Amphipoda
10108642	880	ug/L	96	h	SW	LC50	Amphipoda
10108642	NR	ug/L	96	h	SW	LC50	Amphipoda
10108642	NR	ug/L	96	h	SW	LC50	Amphipoda
10108642	NR	ug/L	96	h	SW	LC50	Amphipoda
10108642	230	ug/L	96	h	SW	LC50	Amphipoda
10108642	300	ug/L	96	h	SW	LC50	Amphipoda
10108642	370	ug/L	96	h	SW	LC50	Amphipoda
10108642	520	ug/L	96	h	SW	LC50	Amphipoda
10108642	90	ug/L	96	h	SW	LC50	Amphipoda
10108642	300	ug/L	96	h	SW	LC50	Amphipoda
10108642	NR	ug/L	96	h	SW	LC50	Amphipoda
10108642	NR	ug/L	96	h	SW	LC50	Amphipoda
10108642	NR	ug/L	96	h	SW	LC50	Amphipoda
10108642	0.59	mg/L	96	h	SW	LC50	Amphipoda
83329	0.96	mg/L	96	h	SW	LC50	Amphipoda
120821	0.5	mg/L	96	h	SW	LC50	Amphipoda
127184	9.1	mg/L	96	h	SW	LC50	Amphipoda
1461229	NR	ng/ml	4	d	SW	LC50	Amphipoda
2921882	0.39	ppb	96	h	SW	LC50	Amphipoda
2921882	0.1	ppb	4	d	SW	LC50	Amphipoda
10108642	470	ug/L	96	h	SW	LC50	Amphipoda
10108642	280	ug/L	96	h	SW	LC50	Amphipoda
84852153	61.6	ug/L	96	h	SW	LC50	Amphipoda
206440	67	ug/L	96	h	SW	LC50	Amphipoda
104405	1670	ug/L	96	h	SW	LC50	Amphipoda
84852153	299	ug/L	96	h	SW	LC50	Amphipoda
84852153	194	ug/L	96	h	SW	LC50	Amphipoda
84852153	189	ug/L	96	h	SW	LC50	Amphipoda
2921882	0.3	ug/L	96	h	SW	LC50	Amphipoda
2921882	0.19	ug/L	96	h	SW	LC50	Amphipoda
121755	4.65	ug/L	96	h	SW	LC50	Amphipoda
121755	2.29	ug/L	96	h	SW	LC50	Amphipoda
115297	0.43	ug/L	96	h	SW	LC50	Amphipoda
115297	0.54	ug/L	96	h	SW	LC50	Amphipoda
333415	6.6	ug/L	96	h	SW	LC50	Amphipoda
93721	250	ppb	96	h	SW	LC50	Amphipoda
7758987	0.25	mg/L	96	h	SW	LC50	Amphipoda
7646857	1.3	mg/L	96	h	SW	LC50	Amphipoda
10099748	0.62	mg/L	96	h	SW	LC50	Amphipoda
67481	NR	mg/L	96	h	SW	LC50	Amphipoda
39638329	35	ul/L	96	h	SW	LC50	Amphipoda
39638329	40	ul/L	96	h	SW	LC50	Amphipoda
112732	116	mg/L	96	h	SW	LC50	Amphipoda
112732	101	mg/L	96	h	SW	LC50	Amphipoda
13343981	560	mg/L	96	h	SW	LC50	Amphipoda
13343981	900	mg/L	96	h	SW	LC50	Amphipoda
111762	1000	mg/L	96	h	SW	LC50	Amphipoda
111762	1000	mg/L	96	h	SW	LC50	Amphipoda
98011	15	mg/L	96	h	SW	LC50	Amphipoda
98011	21	mg/L	96	h	SW	LC50	Amphipoda
2517433	1000	mg/L	96	h	SW	LC50	Amphipoda
2517433	1000	mg/L	96	h	SW	LC50	Amphipoda
57556	1000	mg/L	96	h	SW	LC50	Amphipoda
57136	1000	mg/L	96	h	SW	LC50	Amphipoda
25013154	41	mg/L	96	h	SW	LC50	Amphipoda
25013154	1.6	mg/L	96	h	SW	LC50	Amphipoda
26760645	60	mg/L	96	h	SW	LC50	Amphipoda
26760645	30	mg/L	96	h	SW	LC50	Amphipoda
13389429	0.6	mg/L	96	h	SW	LC50	Amphipoda
13389429	0.6	mg/L	96	h	SW	LC50	Amphipoda
13389429	3.2	mg/L	96	h	SW	LC50	Amphipoda
13389429	3.2	mg/L	96	h	SW	LC50	Amphipoda
821954	0.32	mg/L	96	h	SW	LC50	Amphipoda
821954	0.3	mg/L	96	h	SW	LC50	Amphipoda
821954	2	mg/L	96	h	SW	LC50	Amphipoda
821954	3.2	mg/L	96	h	SW	LC50	Amphipoda
99627	1	mg/L	96	h	SW	LC50	Amphipoda
99627	NR	mg/L	96	h	SW	LC50	Amphipoda
109682	32	mg/L	96	h	SW	LC50	Amphipoda
1574410	35	mg/L	96	h	SW	LC50	Amphipoda
1344678	3.7	mg/L	96	h	SW	LC50	Amphipoda
1344678	33.5	ug/L	96	h	SW	LC50	Amphipoda
40596698	100	mg/L	96	h	SW	LC50	Amphipoda
40596698	100	mg/L	96	h	SW	LC50	Amphipoda
40596698	100	mg/L	96	h	SW	LC50	Amphipoda
10108642	2280	ug/L	96	h	SW	LC50	Amphipoda
7758987	340	ug/L	96	h	SW	LC50	Amphipoda
7758954	3000	ug/L	96	h	SW	LC50	Amphipoda
7718549	16800	ug/L	96	h	SW	LC50	Amphipoda
7733020	3530	ug/L	96	h	SW	LC50	Amphipoda
10108642	520	ug/L	96	h	SW	LC50	Amphipoda
7758987	120	ug/L	96	h	SW	LC50	Amphipoda
7758954	1530	ug/L	96	h	SW	LC50	Amphipoda
7718549	2430	ug/L	96	h	SW	LC50	Amphipoda
7733020	640	ug/L	96	h	SW	LC50	Amphipoda
7758987	20.74	mg/L	96	h	SW	LC50	Amphipoda
7758987	37.59	mg/L	96	h	SW	LC50	Amphipoda
7733020	9.79	mg/L	96	h	SW	LC50	Amphipoda
7733020	14.12	mg/L	96	h	SW	LC50	Amphipoda
10108642	9.03	mg/L	96	h	SW	LC50	Amphipoda
10108642	12.5	mg/L	96	h	SW	LC50	Amphipoda
7646857	1560	ug/L	4	d	SW	LC50	Amphipoda
7646857	4500	ug/L	4	d	SW	LC50	Amphipoda
7646857	1130	ug/L	96	h	SW	LC50	Amphipoda
7646857	500	ug/L	96	h	SW	LC50	Amphipoda
7646857	710	ug/L	96	h	SW	LC50	Amphipoda
7646857	650	ug/L	96	h	SW	LC50	Amphipoda
7646857	640	ug/L	96	h	SW	LC50	Amphipoda
7733020	41.6	ppm	96	h	SW	LC50	Amphipoda
7646857	14	uM	96	h	SW	LC50	Amphipoda
8002059	55	ppm	96	h	SW	LC50	Amphipoda
8002059	68	ppm	96	h	SW	LC50	Amphipoda
8002059	47	ppm	96	h	SW	LC50	Amphipoda
8002059	38	ppm	96	h	SW	LC50	Amphipoda
8002059	59	ppm	96	h	SW	LC50	Amphipoda
8002059	49	ppm	96	h	SW	LC50	Amphipoda
8002059	44	ppm	96	h	SW	LC50	Amphipoda
8002059	55	ppm	96	h	SW	LC50	Amphipoda
8002059	32	ppm	96	h	SW	LC50	Amphipoda
8002059	56	ppm	96	h	SW	LC50	Amphipoda
8002059	53	ppm	96	h	SW	LC50	Amphipoda
7758987	182	ug/L	4	d	SW	LC50	Amphipoda
7758987	220	ug/L	4	d	SW	LC50	Amphipoda
7758987	308	ug/L	4	d	SW	LC50	Amphipoda
7758987	230	ug/L	4	d	SW	LC50	Amphipoda
7758987	120	ug/L	4	d	SW	LC50	Amphipoda
7758987	470	ug/L	4	d	SW	LC50	Amphipoda
6484522	47	mg/L	4	d	SW	LC50	Amphipoda
7758987	230	ug/L	4	d	SW	LC50	Amphipoda
7758987	190	ug/L	4	d	SW	LC50	Amphipoda
7487947	0.01	mg/L	96	h	SW	LC50	Amphipoda
10108642	1.68	mg/L	96	h	SW	LC50	Amphipoda
7447394	0.82	mg/L	96	h	SW	LC50	Amphipoda
7447394	0.47	mg/L	96	h	SW	LC50	Amphipoda
7487947	0.07	mg/L	96	h	SW	LC50	Amphipoda
10108642	0.71	mg/L	96	h	SW	LC50	Amphipoda
10108642	27.66	ppm	96	h	SW	LC50	Amphipoda
7646857	62.74	ppm	96	h	SW	LC50	Amphipoda
7447394	13.28	ppm	96	h	SW	LC50	Amphipoda
10108642	0.71	mg/L	96	h	SW	LC50	Amphipoda
7447394	0.82	mg/L	96	h	SW	LC50	Amphipoda
10108642	NR	mg/L	96	h	SW	LC50	Amphipoda
10108642	NR	mg/L	96	h	SW	LC50	Amphipoda
10108642	NR	mg/L	96	h	SW	LC50	Amphipoda
10108642	NR	mg/L	96	h	SW	LC50	Amphipoda
7758987	0.893	mg/L	96	h	SW	LC50	Amphipoda
7447394	120	ug/L	96	h	SW	LC50	Amphipoda
7447394	180	ug/L	96	h	SW	LC50	Amphipoda
7447394	120	ug/L	96	h	SW	LC50	Amphipoda
7447394	100	ug/L	96	h	SW	LC50	Amphipoda
7447394	100	ug/L	96	h	SW	LC50	Amphipoda
7758987	78	ug/L	96	h	SW	LC50	Amphipoda
13463417	29	ug/L	96	h	SW	LC50	Amphipoda
7440439	1.5	mg/L	96	h	SW	LC50	Amphipoda
7440439	0.1	mg/L	96	h	SW	LC50	Amphipoda
7440439	0.1	mg/L	96	h	SW	LC50	Amphipoda
7440439	0.2	mg/L	96	h	SW	LC50	Amphipoda
7440439	NR	mg/L	96	h	SW	LC50	Amphipoda
7440439	NR	mg/L	96	h	SW	LC50	Amphipoda
7440439	NR	mg/L	96	h	SW	LC50	Amphipoda
7440439	NR	mg/L	96	h	SW	LC50	Amphipoda
7440439	NR	mg/L	96	h	SW	LC50	Amphipoda
7440439	4	mg/L	96	h	SW	LC50	Amphipoda
7440439	NR	mg/L	96	h	SW	LC50	Amphipoda
7440439	NR	mg/L	96	h	SW	LC50	Amphipoda
7440439	0.6	mg/L	96	h	SW	LC50	Amphipoda
7440439	0.53	mg/L	96	h	SW	LC50	Amphipoda
7758987	77	ug/L	96	h	SW	LC50	Amphipoda
56359	9.4	ug/L	96	h	SW	LC50	Amphipoda
28159980	1000	ug/L	96	h	SW	LC50	Amphipoda
330541	3000	ug/L	96	h	SW	LC50	Amphipoda
13463417	29	ug/L	96	h	SW	LC50	Amphipoda
154592208	11	ug/L	96	h	SW	LC50	Amphipoda
1897456	67	ug/L	96	h	SW	LC50	Amphipoda
52918635	3.2	AI ng/L	96	h	SW	LC50	Amphipoda
52918635	7.99	AI ng/L	96	h	SW	LC50	Amphipoda
52918635	1.66	AI ng/L	96	h	SW	LC50	Amphipoda
52918635	13.1	AI ng/L	96	h	SW	LC50	Amphipoda
52918635	0.32	AI ng/L	96	h	SW	LC50	Amphipoda
3380345	73.4	ug/L	96	h	SW	LC50	Amphipoda
1314132	1.19	mg/L	96	h	SW	LC50	Amphipoda
1314132	0.37	mg/L	96	h	SW	LC50	Amphipoda
1314132	0.95	mg/L	96	h	SW	LC50	Amphipoda
7733020	0.8	mg/L	96	h	SW	LC50	Amphipoda
52918635	70	AI ng/L	96	h	SW	LC50	Amphipoda
52918635	9.4	AI ng/L	96	h	SW	LC50	Amphipoda
52315078	220	AI ng/L	96	h	SW	LC50	Amphipoda
52315078	77	AI ng/L	96	h	SW	LC50	Amphipoda
15584040	3.511	mg/L	96	h	SW	LC50	Amphipoda
75605	54.65	mg/L	96	h	SW	LC50	Amphipoda
7447394	1.06	mg/L	96	h	SW	LC50	Amphipoda
7440508	2.83	umol/L	96	h	SW	LC50	Amphipoda
7440439	5.35	umol/L	96	h	SW	LC50	Amphipoda
7439921	10.38	umol/L	96	h	SW	LC50	Amphipoda
7440666	21.36	umol/L	96	h	SW	LC50	Amphipoda
70288867	0.033	ug/L	96	h	SW	LC50	Amphipoda

## Sheet: Harpacticoida297
CASRN	Experimental Values	Unit	Test Time	Unit	Aquatic Environment	Endpoint	Data set
112301	4000	ug/L	96	h	SW	LC50	Harpacticoida
106489	21000	ug/L	96	h	SW	LC50	Harpacticoida
71363	2100000	ug/L	96	h	SW	LC50	Harpacticoida
67641	16700000	ug/L	96	h	SW	LC50	Harpacticoida
143088	25000	ug/L	96	h	SW	LC50	Harpacticoida
111875	58000	ug/L	96	h	SW	LC50	Harpacticoida
71410	440000	ug/L	96	h	SW	LC50	Harpacticoida
71238	2300000	ug/L	96	h	SW	LC50	Harpacticoida
76039	4800000	ug/L	96	h	SW	LC50	Harpacticoida
999815	80000	ug/L	96	h	SW	LC50	Harpacticoida
75990	4800000	ug/L	96	h	SW	LC50	Harpacticoida
533744	1700	ug/L	96	h	SW	LC50	Harpacticoida
50293	30	ug/L	96	h	SW	LC50	Harpacticoida
87865	270	ug/L	96	h	SW	LC50	Harpacticoida
77996	5250000	ug/L	96	h	SW	LC50	Harpacticoida
78400	950000	ug/L	96	h	SW	LC50	Harpacticoida
112425	1400	ug/L	96	h	SW	LC50	Harpacticoida
2634335	25000	ug/L	96	h	SW	LC50	Harpacticoida
6317186	600	ug/L	96	h	SW	LC50	Harpacticoida
6317186	480	ug/L	96	h	SW	LC50	Harpacticoida
131113	62000	ug/L	96	h	SW	LC50	Harpacticoida
84764	300000	ug/L	96	h	SW	LC50	Harpacticoida
106694	13700000	ug/L	96	h	SW	LC50	Harpacticoida
100970	92500000	ug/L	96	h	SW	LC50	Harpacticoida
111706	210000	ug/L	96	h	SW	LC50	Harpacticoida
64175	7750000	ug/L	96	h	SW	LC50	Harpacticoida
112367	6600000	ug/L	96	h	SW	LC50	Harpacticoida
112538	900	ug/L	96	h	SW	LC50	Harpacticoida
66794750	300	ug/L	96	h	SW	LC50	Harpacticoida
117817	300000	ug/L	96	h	SW	LC50	Harpacticoida
84695	3000	ug/L	96	h	SW	LC50	Harpacticoida
84742	1700	ug/L	96	h	SW	LC50	Harpacticoida
7681529	40	mg/L	96	h	SW	LC50	Harpacticoida
7733020	4300	ug/L	96	h	SW	LC50	Harpacticoida
514103	6200	ug/L	96	h	SW	LC50	Harpacticoida
7778805	1180000	ug/L	96	h	SW	LC50	Harpacticoida
56359	2	ug/L	96	h	SW	LC50	Harpacticoida
1983104	0.002	mg/L	96	h	SW	LC50	Harpacticoida
107415	7600000	ug/L	96	h	SW	LC50	Harpacticoida
7778509	5600	ug/L	96	h	SW	LC50	Harpacticoida
79436	23000	ug/L	96	h	SW	LC50	Harpacticoida
39202396	21000	ug/L	96	h	SW	LC50	Harpacticoida
60318276	170	ug/L	96	h	SW	LC50	Harpacticoida
67561	12000000	ug/L	96	h	SW	LC50	Harpacticoida
38641940	22000	ug/L	96	h	SW	LC50	Harpacticoida
148798	24000	ug/L	96	h	SW	LC50	Harpacticoida
1194656	270	ug/L	96	h	SW	LC50	Harpacticoida
51630581	1.9	ug/L	96	h	SW	LC50	Harpacticoida
27541884	600	ug/L	96	h	SW	LC50	Harpacticoida
148243	11500	ug/L	96	h	SW	LC50	Harpacticoida
34911461	1070	ug/L	96	h	SW	LC50	Harpacticoida
19480434	4300	ug/L	96	h	SW	LC50	Harpacticoida
1929868	87000	ug/L	96	h	SW	LC50	Harpacticoida
12427382	110	ug/L	96	h	SW	LC50	Harpacticoida
1929733	3100	ug/L	96	h	SW	LC50	Harpacticoida
20679587	240	ug/L	96	h	SW	LC50	Harpacticoida
379522	8	ug/L	96	h	SW	LC50	Harpacticoida
52645531	0.6	ug/L	96	h	SW	LC50	Harpacticoida
8001545	900	ug/L	96	h	SW	LC50	Harpacticoida
2668248	5200	ug/L	96	h	SW	LC50	Harpacticoida
2539175	3900	ug/L	96	h	SW	LC50	Harpacticoida
1198556	3300	ug/L	96	h	SW	LC50	Harpacticoida
7664417	70	mg/L	96	h	SW	LC50	Harpacticoida
7487947	230	ug/L	96	h	SW	LC50	Harpacticoida
62938152	200	ug/L	96	h	SW	LC50	Harpacticoida
7646857	1450	ug/L	96	h	SW	LC50	Harpacticoida
106434	11800	ug/L	96	h	SW	LC50	Harpacticoida
25155231	1900	ug/L	96	h	SW	LC50	Harpacticoida
25339177	13000	ug/L	96	h	SW	LC50	Harpacticoida
7705080	21000	ug/L	96	h	SW	LC50	Harpacticoida
72559	2.5	ug/L	96	h	SW	LC50	Harpacticoida
7646799	4500	ug/L	96	h	SW	LC50	Harpacticoida
1344678	1800	ug/L	96	h	SW	LC50	Harpacticoida
10043524	580000	ug/L	96	h	SW	LC50	Harpacticoida
10108642	1800	ug/L	96	h	SW	LC50	Harpacticoida
7446700	10000	ug/L	96	h	SW	LC50	Harpacticoida
7447407	450000	ug/L	96	h	SW	LC50	Harpacticoida
7786303	720000	ug/L	96	h	SW	LC50	Harpacticoida
11132788	70000	ug/L	96	h	SW	LC50	Harpacticoida
7718549	6000	ug/L	96	h	SW	LC50	Harpacticoida
120821	2600	ug/L	96	h	SW	LC50	Harpacticoida
87683	1200	ug/L	96	h	SW	LC50	Harpacticoida
107200	1500	ug/L	96	h	SW	LC50	Harpacticoida
117817	1000000	ug/L	96	h	SW	LC50	Harpacticoida
84662	74000	ug/L	96	h	SW	LC50	Harpacticoida
104756	7000	ug/L	96	h	SW	LC50	Harpacticoida
67561	12000000	ug/L	96	h	SW	LC50	Harpacticoida
64175	7750000	ug/L	96	h	SW	LC50	Harpacticoida
71238	2300000	ug/L	96	h	SW	LC50	Harpacticoida
71363	2100000	ug/L	96	h	SW	LC50	Harpacticoida
71410	440000	ug/L	96	h	SW	LC50	Harpacticoida
111273	317000	ug/L	96	h	SW	LC50	Harpacticoida
111706	210000	ug/L	96	h	SW	LC50	Harpacticoida
111706	169000	ug/L	96	h	SW	LC50	Harpacticoida
111875	60000	ug/L	96	h	SW	LC50	Harpacticoida
143088	25000	ug/L	96	h	SW	LC50	Harpacticoida
112301	3100	ug/L	96	h	SW	LC50	Harpacticoida
112425	1100	ug/L	96	h	SW	LC50	Harpacticoida
112425	910	ug/L	96	h	SW	LC50	Harpacticoida
112425	800	ug/L	96	h	SW	LC50	Harpacticoida
112538	1000	ug/L	96	h	SW	LC50	Harpacticoida
25155231	880	ug/L	96	h	SW	LC50	Harpacticoida
87865	150	ug/L	96	h	SW	LC50	Harpacticoida
87865	70	ug/L	96	h	SW	LC50	Harpacticoida
7778430	3000	ug/L	96	h	SW	LC50	Harpacticoida
10108642	780	ug/L	96	h	SW	LC50	Harpacticoida
10108642	660	ug/L	96	h	SW	LC50	Harpacticoida
7733020	2400	ug/L	96	h	SW	LC50	Harpacticoida
7733020	2800	ug/L	96	h	SW	LC50	Harpacticoida
7646857	1300	ug/L	96	h	SW	LC50	Harpacticoida
90120	13000	ug/L	96	h	SW	LC50	Harpacticoida
627634	60000	ug/L	96	h	SW	LC50	Harpacticoida
1634044	1000000	ug/L	96	h	SW	LC50	Harpacticoida
10108642	460	ug/L	96	h	SW	LC50	Harpacticoida
10108642	340	ug/L	96	h	SW	LC50	Harpacticoida
3251238	88	ug/L	96	h	SW	LC50	Harpacticoida
3251238	64	ug/L	96	h	SW	LC50	Harpacticoida
7778509	1600	ug/L	96	h	SW	LC50	Harpacticoida
7778509	5900	ug/L	96	h	SW	LC50	Harpacticoida
7758987	178	ug/L	96	h	SW	LC50	Harpacticoida
7778509	14000	ug/L	96	h	SW	LC50	Harpacticoida
7778509	29000	ug/L	96	h	SW	LC50	Harpacticoida
7778509	50000	ug/L	96	h	SW	LC50	Harpacticoida
7778509	24200	ug/L	96	h	SW	LC50	Harpacticoida
7778509	20500	ug/L	96	h	SW	LC50	Harpacticoida
7778509	22700	ug/L	96	h	SW	LC50	Harpacticoida
7778509	15500	ug/L	96	h	SW	LC50	Harpacticoida
7778509	22000	ug/L	96	h	SW	LC50	Harpacticoida
7778509	11500	ug/L	96	h	SW	LC50	Harpacticoida
7778509	8700	ug/L	96	h	SW	LC50	Harpacticoida
7778509	21000	ug/L	96	h	SW	LC50	Harpacticoida
7778509	17000	ug/L	96	h	SW	LC50	Harpacticoida
7778509	34800	ug/L	96	h	SW	LC50	Harpacticoida
7778509	7500	ug/L	96	h	SW	LC50	Harpacticoida
7778509	34800	ug/L	96	h	SW	LC50	Harpacticoida
7778509	54600	ug/L	96	h	SW	LC50	Harpacticoida
7778509	34000	ug/L	96	h	SW	LC50	Harpacticoida
7778509	15000	ug/L	96	h	SW	LC50	Harpacticoida
7778509	44600	ug/L	96	h	SW	LC50	Harpacticoida
61789364	4800	ug/L	96	h	SW	LC50	Harpacticoida
26248420	1000000	ug/L	96	h	SW	LC50	Harpacticoida
7761888	36.37	ug/L	96	h	SW	LC50	Harpacticoida
7761888	55.66	ug/L	96	h	SW	LC50	Harpacticoida
7761888	120.81	ug/L	96	h	SW	LC50	Harpacticoida
7761888	159	ug/L	96	h	SW	LC50	Harpacticoida
7758987	308	ug/L	96	h	SW	LC50	Harpacticoida
7758987	412	ug/L	96	h	SW	LC50	Harpacticoida
7758987	790	ug/L	96	h	SW	LC50	Harpacticoida
7758987	1010	ug/L	96	h	SW	LC50	Harpacticoida
7761888	87.5	ug/L	96	h	SW	LC50	Harpacticoida
7761888	129.4	ug/L	96	h	SW	LC50	Harpacticoida
10108642	17.4	ug/L	96	h	SW	LC50	Harpacticoida
10108642	29.7	ug/L	96	h	SW	LC50	Harpacticoida
10108642	47.9	ug/L	96	h	SW	LC50	Harpacticoida
1563662	17.7	ug/L	96	h	SW	LC50	Harpacticoida
1563662	36.5	ug/L	96	h	SW	LC50	Harpacticoida
1563662	59.9	ug/L	96	h	SW	LC50	Harpacticoida
1912249	120.9	ug/L	96	h	SW	LC50	Harpacticoida
1912249	124.5	ug/L	96	h	SW	LC50	Harpacticoida
1912249	153.2	ug/L	96	h	SW	LC50	Harpacticoida
121755	7.2	ug/L	96	h	SW	LC50	Harpacticoida
121755	20.5	ug/L	96	h	SW	LC50	Harpacticoida
121755	24.3	ug/L	96	h	SW	LC50	Harpacticoida
62737	0.92	ug/L	96	h	SW	LC50	Harpacticoida
62737	2.9	ug/L	96	h	SW	LC50	Harpacticoida
62737	4.6	ug/L	96	h	SW	LC50	Harpacticoida
7784410	10.9	ug/L	96	h	SW	LC50	Harpacticoida
7784410	19.8	ug/L	96	h	SW	LC50	Harpacticoida
7784410	27.5	ug/L	96	h	SW	LC50	Harpacticoida
1912249	1	mg/L	96	h	SW	LC50	Harpacticoida
7440508	124.6	ug/L	96	h	SW	LC50	Harpacticoida
120068373	3.5	ug/L	96	h	SW	LC50	Harpacticoida
120068373	6.8	ug/L	96	h	SW	LC50	Harpacticoida
120068373	13	ug/L	96	h	SW	LC50	Harpacticoida
1897456	53.12	ug/L	96	h	SW	LC50	Harpacticoida
1897456	59.4	ug/L	96	h	SW	LC50	Harpacticoida
1897456	26.72	ug/L	96	h	SW	LC50	Harpacticoida
1897456	89.68	ug/L	96	h	SW	LC50	Harpacticoida
57636	0.51	mg/L	96	h	SW	LC50	Harpacticoida
2921882	3.56	ug/L	96	h	SW	LC50	Harpacticoida
2921882	8.37	ug/L	96	h	SW	LC50	Harpacticoida
2921882	0.61	ug/L	96	h	SW	LC50	Harpacticoida
2921882	3.6	ug/L	96	h	SW	LC50	Harpacticoida
330541	4000	ug/L	96	h	SW	LC50	Harpacticoida
7733020	715.2	ug/L	96	h	SW	LC50	Harpacticoida
56531	0.29	mg/L	96	h	SW	LC50	Harpacticoida
50282	1.6	mg/L	96	h	SW	LC50	Harpacticoida
7440666	375.8	ug/L	96	h	SW	LC50	Harpacticoida
7761888	95	ug/L	96	h	SW	LC50	Harpacticoida
86500	1.8	ug/L	96	h	SW	LC50	Harpacticoida
86500	3.6	ug/L	96	h	SW	LC50	Harpacticoida
86500	1.99	ug/L	96	h	SW	LC50	Harpacticoida
86500	5	ug/L	96	h	SW	LC50	Harpacticoida
688733	0.05	mg/L	96	h	SW	LC50	Harpacticoida
80057	0.2	mg/L	96	h	SW	LC50	Harpacticoida
11097691	2.5	mg/L	96	h	SW	LC50	Harpacticoida
2212671	35.5	mg/L	96	h	SW	LC50	Harpacticoida
7646857	7.8	mg/L	96	h	SW	LC50	Harpacticoida
10108642	25.2	mg/L	96	h	SW	LC50	Harpacticoida
104405	0.5	mg/L	96	h	SW	LC50	Harpacticoida
140669	0.3	mg/L	96	h	SW	LC50	Harpacticoida
98544	22	mg/L	96	h	SW	LC50	Harpacticoida
115297	0.07	mg/L	96	h	SW	LC50	Harpacticoida
15972608	7.3	mg/L	96	h	SW	LC50	Harpacticoida
7758987	3.9	mg/L	96	h	SW	LC50	Harpacticoida
7758987	585	ug/L	96	h	SW	LC50	Harpacticoida
7758987	323	ug/L	96	h	SW	LC50	Harpacticoida
7758987	800	ug/L	96	h	SW	LC50	Harpacticoida
7447394	813	ug/L	96	h	SW	LC50	Harpacticoida
142712	743	ug/L	96	h	SW	LC50	Harpacticoida
7758896	1175	ug/L	96	h	SW	LC50	Harpacticoida
28159980	4500	ug/L	96	h	SW	LC50	Harpacticoida
7758987	1024	ug/L	96	h	SW	LC50	Harpacticoida
1461229	0.149	ug/L	96	h	SW	LC50	Harpacticoida
7784465	9.7	mg/L	96	h	SW	LC50	Harpacticoida
7761888	0.024	mg/L	96	h	SW	LC50	Harpacticoida
7784465	9.7	mg/L	96	h	SW	LC50	Harpacticoida
7778430	17.2	mg/L	96	h	SW	LC50	Harpacticoida
1912249	7.5	mg/L	96	h	SW	LC50	Harpacticoida
1912249	31.8	mg/L	96	h	SW	LC50	Harpacticoida
7733020	1.7	mg/L	96	h	SW	LC50	Harpacticoida
7733020	2.7	mg/L	96	h	SW	LC50	Harpacticoida
120068373	5.09	ug/L	96	h	SW	LC50	Harpacticoida
120068373	1.68	ug/L	96	h	SW	LC50	Harpacticoida
120068373	6.07	ug/L	96	h	SW	LC50	Harpacticoida
120068373	3.86	ug/L	96	h	SW	LC50	Harpacticoida
7758987	580	ug/L	96	h	SW	LC50	Harpacticoida
56359	18	ug/L	96	h	SW	LC50	Harpacticoida
28159980	2400	ug/L	96	h	SW	LC50	Harpacticoida
330541	11000	ug/L	96	h	SW	LC50	Harpacticoida
13463417	170	ug/L	96	h	SW	LC50	Harpacticoida
154592208	30	ug/L	96	h	SW	LC50	Harpacticoida
1897456	91	ug/L	96	h	SW	LC50	Harpacticoida
1897456	97.4	ug/L	96	h	SW	LC50	Harpacticoida
1897456	80	ug/L	96	h	SW	LC50	Harpacticoida
1897456	96.4	ug/L	96	h	SW	LC50	Harpacticoida
1897456	100	ug/L	96	h	SW	LC50	Harpacticoida
1897456	90.6	ug/L	96	h	SW	LC50	Harpacticoida
1897456	100	ug/L	96	h	SW	LC50	Harpacticoida
1897456	80	ug/L	96	h	SW	LC50	Harpacticoida
1897456	59.7	ug/L	96	h	SW	LC50	Harpacticoida
154592208	54	ug/L	96	h	SW	LC50	Harpacticoida
154592208	73.8	ug/L	96	h	SW	LC50	Harpacticoida
154592208	60	ug/L	96	h	SW	LC50	Harpacticoida
154592208	32.8	ug/L	96	h	SW	LC50	Harpacticoida
154592208	9	ug/L	96	h	SW	LC50	Harpacticoida
7778509	31	mg/L	96	h	SW	LC50	Harpacticoida
118967	1.5	mg/L	96	h	SW	LC50	Harpacticoida
88891	92	mg/L	96	h	SW	LC50	Harpacticoida
88891	72	mg/L	96	h	SW	LC50	Harpacticoida
118967	7.6	mg/L	96	h	SW	LC50	Harpacticoida
118967	6.8	mg/L	96	h	SW	LC50	Harpacticoida
121824	36	mg/L	96	h	SW	LC50	Harpacticoida
121824	33	mg/L	96	h	SW	LC50	Harpacticoida
556887	85	mg/L	96	h	SW	LC50	Harpacticoida
121142	17	mg/L	96	h	SW	LC50	Harpacticoida
121142	17	mg/L	96	h	SW	LC50	Harpacticoida
78115	32	mg/L	96	h	SW	LC50	Harpacticoida
122394	3.7	mg/L	96	h	SW	LC50	Harpacticoida
122394	1.22	mg/L	96	h	SW	LC50	Harpacticoida
7733020	2	mg/L	96	h	SW	LC50	Harpacticoida
85018	0.89	mg/L	96	h	SW	LC50	Harpacticoida
1912249	7.58	mg/L	96	h	SW	LC50	Harpacticoida
7733020	0.64	mg/L	96	h	SW	LC50	Harpacticoida
85018	0.75	mg/L	96	h	SW	LC50	Harpacticoida
1912249	20.8	mg/L	96	h	SW	LC50	Harpacticoida
7733020	0.38	mg/L	96	h	SW	LC50	Harpacticoida
7733020	1.1	mg/L	96	h	SW	LC50	Harpacticoida
1912249	13.3	mg/L	96	h	SW	LC50	Harpacticoida
1912249	44	mg/L	96	h	SW	LC50	Harpacticoida
85018	0.64	mg/L	96	h	SW	LC50	Harpacticoida
85018	0.79	mg/L	96	h	SW	LC50	Harpacticoida
1314132	0.85	mg/L	96	h	SW	LC50	Harpacticoida
1314132	0.43	mg/L	96	h	SW	LC50	Harpacticoida
1314132	0.68	mg/L	96	h	SW	LC50	Harpacticoida
7733020	1.14	mg/L	96	h	SW	LC50	Harpacticoida
28159980	1800	ug/L	96	h	SW	LC50	Harpacticoida
7758987	330	ug/L	96	h	SW	LC50	Harpacticoida
7447394	334.24	ug/L	96	h	SW	LC50	Harpacticoida
7447394	538.67	ug/L	96	h	SW	LC50	Harpacticoida
7447394	741.83	ug/L	96	h	SW	LC50	Harpacticoida
7447394	857.19	ug/L	96	h	SW	LC50	Harpacticoida
7447394	2100	ug/L	96	h	SW	LC50	Harpacticoida
7646857	890	ug/L	96	h	SW	LC50	Harpacticoida
7758987	32.75	mg/L	96	h	SW	LC50	Harpacticoida
1314132	1.22	mg/L	96	h	SW	LC50	Harpacticoida
1314132	2.44	mg/L	96	h	SW	LC50	Harpacticoida
7447394	0.14	mg/L	96	h	SW	LC50	Harpacticoida
7758987	238	ug/L	96	h	SW	LC50	Harpacticoida
7758987	350	ug/L	96	h	SW	LC50	Harpacticoida
6484522	300	ug/L	96	h	SW	LC50	Harpacticoida
108952	37	mg/L	96	h	SW	LC50	Harpacticoida
7447394	50	ug/L	96	h	SW	LC50	Harpacticoida
87865	134	ug/L	96	h	SW	LC50	Harpacticoida
206440	68.3	ug/L	4	d	SW	LC50	Harpacticoida
52315078	37.3	ng/L	4	d	SW	LC50	Harpacticoida
52918635	15.1	ng/L	4	d	SW	LC50	Harpacticoida
