# Supplementary material for: In silico prediction of chemical aquatic toxicity for marine crustaceans via machine learning
Source: Royal Society of Chemistry journal article supplement (doi:10.1039/c8tx00331a), 2019-01-01
Supplement: c8tx00331a3.xlsx [file c8tx00331a3.xlsx]

## Sheet: Global models
Descriptor Type	Descriptor
XLogP	XLogP
Atom type electrotopological state	SHBd
Atom type electrotopological state	maxHBint2
Atom type electrotopological state	maxwHBa
Atom type electrotopological state	mindssC
ALOGP	ALogP
Atom type electrotopological state	SwHBa
Autocorrelation	GATS1i
Autocorrelation	GATS4c
Autocorrelation	AATSC1s
Molecular distance edge	MDEC-23

## Sheet: Local models
Descriptor Type	Descriptor
Atom type electrotopological state	mindssC
Crippen logP and MR	CrippenLogP
Atom type electrotopological state	maxHBint2
Atom type electrotopological state	maxwHBa
Autocorrelation	GATS1i
Atom type electrotopological state	hmin
Atom type electrotopological state	SwHBa
Ring count	nT6HeteroRing
Molecular distance edge	MDEO-11
Autocorrelation	GATS4c
