# Supplementary material for: In silico prediction of chemical aquatic toxicity for marine crustaceans via machine learning
Source: Royal Society of Chemistry journal article supplement (doi:10.1039/c8tx00331a), 2019-01-01
Supplement: c8tx00331a4.xlsx [file c8tx00331a4.xlsx]

## Sheet: LocalMD
	Training Set					Test Set
Local models	Q	SE	SP	AUC		Q	SE	SP	AUC
MD-kNN	0.7974	0.8516	0.6875	0.8518		0.7922	0.8226	0.6667	0.8591
MD-CT	0.7603	0.7812	0.7188	0.779		0.7922	0.8226	0.6667	0.7457
MD-SVM	0.8171	0.8984	0.6562	0.8571		0.8571	0.9032	0.6667	0.8247
MD-RF	0.7868	0.875	0.6094	0.8622		0.8442	0.8871	0.6667	0.8602
MD-NB	0.7761	0.8125	0.7031	0.8529		0.7922	0.7903	0.8	0.8581
MD-NN	0.8171	0.8984	0.6562	0.8671		0.8571	0.9032	0.6667	0.8129
