# Supplementary material for: In silico prediction of chemical aquatic toxicity for marine crustaceans via machine learning
Source: Royal Society of Chemistry journal article supplement (doi:10.1039/c8tx00331a), 2019-01-01
Supplement: c8tx00331a5.xlsx [file c8tx00331a5.xlsx]

## Sheet: LocalFP
	Training Set					Test Set
Global models	Q	SE	SP	AUC		Q	SE	SP	AUC
GraphFP-ANN	0.776	0.844	0.641	0.852		0.818	0.823	0.8	0.829
AP2D-ANN	0.775	0.859	0.609	0.848		0.805	0.871	0.533	0.817
AP2D-SVM	0.817	0.922	0.609	0.834		0.87	0.935	0.6	0.795
PubchemFP-RF	0.782	0.859	0.625	0.83		0.857	0.871	0.8	0.869
EStateFP-ANN	0.786	0.859	0.641	0.827		0.818	0.871	0.6	0.835
GraphFP-SVM	0.786	0.914	0.531	0.827		0.896	0.935	0.733	0.868
SubFP-RF	0.765	0.977	0.344	0.825		0.883	0.984	0.467	0.82
SubFP-ANN	0.761	0.844	0.594	0.824		0.857	0.887	0.733	0.828
GraphFP-RF	0.797	0.914	0.562	0.824		0.844	0.887	0.667	0.847
AP2D-RF	0.766	0.891	0.516	0.823		0.779	0.823	0.6	0.827
