# Supplementary material for: In silico prediction of chemical aquatic toxicity for marine crustaceans via machine learning
Source: Royal Society of Chemistry journal article supplement (doi:10.1039/c8tx00331a), 2019-01-01
Supplement: c8tx00331a6.xlsx [file c8tx00331a6.xlsx]

## Sheet: GlobalMD
	Training Set					Test Set
Global models	Q	SE	SP	AUC		Q	SE	SP	AUC
MD-kNN	0.7972	0.8678	0.6552	0.8169		0.8049	0.7969	0.8333	0.9071
MD-CT	0.7397	0.8161	0.5862	0.7027		0.878	0.8906	0.8333	0.8971
MD-SVM	0.805	0.8966	0.6207	0.8455		0.8659	0.9062	0.7222	0.8733
MD-RF	0.801	0.9138	0.5747	0.8482		0.878	0.9219	0.7222	0.8828
MD-NB	0.7934	0.8218	0.7356	0.8464		0.8537	0.8438	0.8889	0.908
MD-ANN	0.7972	0.8736	0.6437	0.8556		0.8537	0.8906	0.7222	0.9097
