# Supplementary material for: In silico prediction of chemical aquatic toxicity for marine crustaceans via machine learning
Source: Royal Society of Chemistry journal article supplement (doi:10.1039/c8tx00331a), 2019-01-01
Supplement: c8tx00331a7.xlsx [file c8tx00331a7.xlsx]

## Sheet: GlobalFP
	Training Set					Test Set
Global models	Q	SE	SP	AUC		Q	SE	SP	AUC
GraphFP-ANN	0.79	0.868	0.632	0.853		0.89	0.906	0.833	0.909
FP-SVM	0.798	0.914	0.563	0.852		0.927	0.969	0.778	0.965
SubFP-ANN	0.82	0.891	0.678	0.847		0.878	0.891	0.833	0.922
ExtFP-ANN	0.813	0.874	0.69	0.84		0.854	0.906	0.667	0.856
KRFP-ANN	0.766	0.81	0.678	0.835		0.756	0.797	0.611	0.745
GraphFP-SVM	0.801	0.937	0.529	0.835		0.878	0.953	0.611	0.933
FP-ANN	0.794	0.874	0.632	0.833		0.878	0.906	0.778	0.895
GraphFP-RF	0.786	0.902	0.552	0.832		0.89	0.938	0.722	0.911
SubFP-SVM	0.805	0.931	0.552	0.831		0.89	0.953	0.667	0.931
EStateFP-RF	0.805	0.966	0.483	0.83		0.841	1	0.278	0.921
