# Supplementary material for: In silico prediction of chemical aquatic toxicity for marine crustaceans via machine learning
Source: Royal Society of Chemistry journal article supplement (doi:10.1039/c8tx00331a), 2019-01-01
Supplement: c8tx00331a8.xlsx [file c8tx00331a8.xlsx]

## Sheet: Local
Canonical_Smiles	Experimental Labels	Data Set	Appliation Domain (ID: In Domain, OD: Out of Domain)
O=c1[nH]sc2ccccc12	1	Test Set	ID
CC1(C)C(C=C(Cl)C(F)(F)F)C1C(=O)OC(C#N)c1cccc(Oc2ccccc2)c1	1	Test Set	ID
CNC(=O)Oc1cccc2OC(C)(C)Oc12	1	Test Set	ID
CCOP(=O)(SC(C)CC)N1CCSC1=O	1	Test Set	ID
CCC(C)(NC(=O)c1cc(Cl)c(C)c(Cl)c1)C(=O)CCl	1	Test Set	ID
COC(=O)NC(=S)Nc1ccccc1NC(=S)NC(=O)OC	1	Test Set	ID
FC(F)(F)c1cnc(CNC(=O)c2c(Cl)cccc2Cl)c(Cl)c1	1	Test Set	ID
COP(=S)(OC)Oc1ccc(SC)c(C)c1	1	Test Set	ID
CN(C)C(=O)Nc1ccc(Cl)c(Cl)c1	1	Test Set	ID
CCNc1nc(Cl)nc(NC(C)(C)C)n1	1	Test Set	ID
CCCCOCN(C(=O)CCl)c1c(CC)cccc1CC	1	Test Set	ID
CNc1c(Cl)c(=O)n(nc1)c1cccc(c1)C(F)(F)F	1	Test Set	ID
ClC(Cl)(Cl)SN1C(=O)C2CC=CCC2C1=O	1	Test Set	ID
CCOP(=O)(NC(C)C)Oc1ccc(SC)c(C)c1	1	Test Set	ID
CCCOCC(=Nc1ccc(Cl)cc1C(F)(F)F)n1ccnc1	1	Test Set	ID
COP(=S)(OC)Oc1ccc(cc1)[N+](=O)[O-]	1	Test Set	ID
CCCCC(Cn1cncn1)(C#N)c1ccc(Cl)cc1	1	Test Set	ID
CCCCN(CC)c1c(cc(cc1[N+](=O)[O-])C(F)(F)F)[N+](=O)[O-]	1	Test Set	ID
Cc1c(ccc(c1C1=NOCC1)S(=O)(=O)C)C(=O)c1cnn(C)c1O	1	Test Set	ID
CCOC(=O)C(C)Oc1ccc(Oc2cnc3cc(Cl)ccc3n2)cc1	1	Test Set	ID
CCCN(CCC)c1c(cc(cc1[N+](=O)[O-])C(F)(F)F)[N+](=O)[O-]	1	Test Set	ID
CSC1=NC(C)(C(=O)N1Nc1ccccc1)c1ccccc1	1	Test Set	ID
[O-][N+](=O)c1cc(c(Cl)c(c1Nc1ncc(cc1Cl)C(F)(F)F)[N+](=O)[O-])C(F)(F)F	1	Test Set	ID
CCN(Cc1c(F)cccc1Cl)c1c(cc(cc1[N+](=O)[O-])C(F)(F)F)[N+](=O)[O-]	1	Test Set	ID
COC(=O)N(C(=O)N1CO[C@]2(Cc3cc(Cl)ccc3C2=N1)C(=O)OC)c1ccc(OC(F)(F)F)cc1	1	Test Set	ID
Oc1ccc(cc1)[N+](=O)[O-]	1	Test Set	ID
CCCOc1nn(C(=O)N=S(=O)(O)c2ccccc2C(=O)OC)c(=O)n1C	0	Test Set	ID
COc1cc(OC)nc(Oc2cccc(Oc3nc(OC)cc(OC)n3)c2C(=O)O)n1	0	Test Set	ID
CC1COC(Cn2cncn2)(O1)c1ccc(Oc2ccc(Cl)cc2)cc1Cl	1	Test Set	ID
CCOC(=O)COc1cc(n2ncc(c(C)c2=O)C(F)(F)F)c(F)cc1Cl	1	Test Set	ID
CCOP(=S)(OCC)OC(Cl)C(Cl)(Cl)Cl	1	Test Set	ID
CCC(C)Nc1c(cc(cc1[N+](=O)[O-])C(C)(C)C)[N+](=O)[O-]	1	Test Set	ID
Clc1ccc(c(Cl)c1)C1(Cn2cncn2)CC(Br)CO1	1	Test Set	ID
CC(C)N(C)S(=O)(=O)NC(=O)c1cc(n2c(=O)cc(n(C)c2=O)C(F)(F)F)c(F)cc1Cl	1	Test Set	ID
CON(C(=O)OC)c1ccccc1COc1ccn(n1)c1ccc(Cl)cc1	1	Test Set	ID
CC(C1CC1)C(O)(Cn1cncn1)c1ccc(Cl)cc1	1	Test Set	ID
CCC(C)c1cc(cc(c1O)[N+](=O)[O-])[N+](=O)[O-]	1	Test Set	ID
COC(=O)c1csc(C)c1S(=O)(=O)NC(=O)n1nc(OC)n(C)c1=O	0	Test Set	ID
COc1cnc(OC)n2nc(NS(=O)(=O)c3c(OCC(F)F)cccc3C(F)(F)F)nc12	0	Test Set	ID
CCCCC(O)(Cn1cncn1)c1ccc(Cl)cc1Cl	1	Test Set	ID
[O-][N+](=O)c1cccc(c1)[N+](=O)[O-]	1	Test Set	ID
Clc1cc(Cl)c(Cl)cc1Cl	1	Test Set	ID
Cc1c(cc(cc1[N+](=O)[O-])[N+](=O)[O-])[N+](=O)[O-]	1	Test Set	ID
CCS(=O)(=O)c1nc2ccccn2c1S(=O)(=O)NC(=O)Nc1nc(OC)cc(OC)n1	0	Test Set	ID
COc1nc(C)nc(NC(=O)NS(=O)(=O)c2ccccc2OCCCl)n1	0	Test Set	ID
Oc1ccccc1Cl	1	Test Set	ID
Oc1cc(Cl)c(Cl)cc1Cl	1	Test Set	ID
COC(=O)c1ccccc1S(=O)(=O)NC(=O)Nc1nc(OC(F)F)cc(OC(F)F)n1	0	Test Set	ID
C#N	1	Test Set	OD
C=CC#N	1	Test Set	OD
O=CCCCC=O	1	Test Set	OD
ClC(=C)Cl	0	Test Set	OD
ClC(=C(Cl)Cl)Cl	1	Test Set	OD
N#CSCSC#N	1	Test Set	OD
o1c2ccccc2c2ccccc12	1	Test Set	OD
OC(=O)C1[C@H]2O[C@H](C=C2)C1C(=O)O	1	Test Set	OD
C=Cc1ccccc1	0	Test Set	OD
ClC1=C(Cl)C2(Cl)C3C4CC(C5OC45)C3C1(Cl)C2(Cl)Cl	1	Test Set	OD
OC(=O)C1C2CCC(O2)C1C(=O)O	0	Test Set	OD
CN(C=Nc1ccc(C)cc1C)C=Nc1ccc(C)cc1C	1	Test Set	OD
CCNC(=O)NC(=O)C(=NOC)C#N	0	Test Set	OD
c1ccc2c(c1)c1cccc3cccc2c13	1	Test Set	OD
CCSC(C)CC1CC(=C(C(=NOCC=CCl)CC)C(=O)C1)O	0	Test Set	OD
COP(=O)(OC)OC=C(Cl)Cl	1	Test Set	OD
OCC(CO)(CO)[N+](=O)[O-]	0	Test Set	OD
OCCOCCOCCO	0	Test Set	OD
CC1(C)CNC(=NC1)NN=C(C=Cc1ccc(cc1)C(F)(F)F)C=Cc1ccc(cc1)C(F)(F)F	1	Test Set	OD
c1ccc2c(c1)ccc1ccccc21	1	Test Set	OD
CP(=O)(O)CCC(N)C(=O)O	1	Test Set	OD
Fc1ccc(Oc2ccnc3cc(Cl)cc(Cl)c23)cc1	1	Test Set	OD
CSC(=O)c1c(CC(C)C)c(C(=O)SC)c(nc1C(F)F)C(F)(F)F	1	Test Set	OD
ClCC=CCl	1	Test Set	OD
CCC(C)n1c(=O)[nH]c(c(Br)c1=O)C	0	Test Set	OD
COc1cc2OC(C)(C)C=Cc2cc1OC	1	Test Set	OD
CC(C)c1cc(OP(=O)(Oc2ccccc2)Oc2ccccc2)cc(c1)c1ccccc1	1	Test Set	OD
CC(F)c1nc(N)nc(NC2C(C)Cc3ccc(C)cc23)n1	1	Test Set	OD
CCN(CC)C(=O)C(C)Oc1cccc2ccccc12	1	Test Set	OD

## Sheet: Global
Canonical_Smiles	Experimental Labels	Data Set	Appliation Domain (ID: In Domain, OD: Out of Domain)
[O-][N+](=O)C(=Cc1ccccc1)Br	1	Test Set	ID
CC1(CCCCC1)C(=O)Nc1ccc(O)c(Cl)c1Cl	1	Test Set	ID
CC1(OC(=O)N(C1=O)c1cc(Cl)cc(Cl)c1)C=C	1	Test Set	ID
CCCCCCCC(=O)Oc1c(Br)cc(cc1Br)C#N	1	Test Set	ID
Cc1c(COC(=O)C2C(C=C(Cl)C(F)(F)F)C2(C)C)cccc1c1ccccc1	1	Test Set	ID
CCCSP(=O)(OCC)Oc1ccc(Br)cc1Cl	1	Test Set	ID
CC(C)C(Nc1ccc(cc1Cl)C(F)(F)F)C(=O)OC(C#N)c1cccc(Oc2ccccc2)c1	1	Test Set	ID
CC(C)CC(C)c1sccc1NC(=O)c1cn(C)nc1C(F)(F)F	1	Test Set	ID
OC(=O)Cc1ccccc1Nc1c(Cl)cccc1Cl	1	Test Set	ID
CCS(=O)CCSP(=O)(OC)OC	1	Test Set	ID
CC(C)Oc1cccc(NC(=O)c2ccccc2C(F)(F)F)c1	1	Test Set	ID
CCOP(=S)(NC(C)C)Oc1ccccc1C(=O)OC(C)C	1	Test Set	ID
COC(=O)Nc1nc2ccccc2[nH]1	1	Test Set	ID
COc1ccc(cc1)C(c1ccc(OC)cc1)C(Cl)(Cl)Cl	1	Test Set	ID
CCOP(=S)(OCC)SCSC(C)(C)C	1	Test Set	ID
FC(F)(F)c1ccc(OCCCOc2c(Cl)cc(OCC=C(Cl)Cl)cc2Cl)nc1	1	Test Set	ID
CC(C)(c1ccc(O)cc1)c1ccc(O)cc1	1	Test Set	ID
CC(C)c1nn(C(=O)NC(C)(C)C)c(=O)n1N	0	Test Set	ID
Cn1c(=O)n(c(=O)cc1C(F)(F)F)c1ccc(Cl)c(c1)C(=O)OC(C)(C)C(=O)OCC=C	1	Test Set	ID
CCOP(=S)(OCC)SCSCC	1	Test Set	ID
CN(C)c1nc(=O)n(C2CCCCC2)c(=O)n1C	0	Test Set	ID
Clc1cccc(Cl)c1C#N	1	Test Set	ID
CNC(=O)c1cc(Cl)cc(C)c1NC(=O)c1cc(Br)nn1c1ncccc1Cl	1	Test Set	ID
CCCCOC(=O)C(C)Oc1ccc(Oc2ccc(cc2F)C#N)cc1	1	Test Set	ID
COc1nn(CSP(=S)(OC)OC)c(=O)s1	1	Test Set	ID
CCCSP(=O)(OCC)SCCC	1	Test Set	ID
CCOP(=S)(OC(C)C)Oc1cnc(nc1)C(C)(C)C	1	Test Set	ID
COP(=O)(OC)OC(=CC(=O)N(C)C)C	1	Test Set	ID
Nc1c(c(nn1c1c(Cl)cc(cc1Cl)C(F)(F)F)C#N)S(=O)C(F)(F)F	1	Test Set	ID
CC1(OC(=O)N(Nc2ccccc2)C1=O)c1ccc(Oc2ccccc2)cc1	1	Test Set	ID
CC1(C)C(C=C(Cl)Cl)C1C(=O)OC(C#N)c1ccc(F)c(Oc2ccccc2)c1	1	Test Set	ID
Oc1ccccc1	1	Test Set	ID
CS(=O)(=O)NC(=O)c1cc(Oc2ccc(cc2Cl)C(F)(F)F)ccc1[N+](=O)[O-]	0	Test Set	ID
CC(C)C(=O)Nc1ccc(c(c1)C(F)(F)F)[N+](=O)[O-]	1	Test Set	ID
CCOc1cc(Oc2ccc(cc2Cl)C(F)(F)F)ccc1[N+](=O)[O-]	1	Test Set	ID
c1ccc2c(c1)cc1ccc3cccc4ccc2c1c34	1	Test Set	ID
c1ccc2c(c1)c1cccc3cccc2c13	1	Test Set	ID
Cc1cccc(C)c1C	1	Test Set	ID
CCCCOC(=O)C(C)Oc1ccc(Oc2ccc(cn2)C(F)(F)F)cc1	1	Test Set	ID
COc1c(Cl)ccc(Cl)c1C(=O)O	0	Test Set	ID
Cc1ccc(O)c(C)c1	1	Test Set	ID
OC(=O)COc1ccc(Cl)cc1Cl	0	Test Set	ID
OC(=O)COc1cc(Cl)c(Cl)cc1Cl	0	Test Set	ID
CCCCC(CC)COC(=O)COc1ccc(Cl)cc1Cl	1	Test Set	ID
CCCN(CCC)c1c(cc(c(N)c1[N+](=O)[O-])C(F)(F)F)[N+](=O)[O-]	1	Test Set	ID
Brc1ccc(Oc2ccccc2)cc1	1	Test Set	ID
COP(=O)(OC)OC=C(Cl)Cl	1	Test Set	ID
CC1(C)C(C=C(Cl)Cl)C1C(=O)OCc1cccc(Oc2ccccc2)c1	1	Test Set	ID
[O-][N+](=O)c1ccc(Cl)cc1	1	Test Set	ID
CN(c1c(cc(cc1[N+](=O)[O-])[N+](=O)[O-])[N+](=O)[O-])[N+](=O)[O-]	1	Test Set	ID
[O-][N+](=O)c1ccccc1	1	Test Set	ID
ClC(Cl)C(Cl)(Cl)Cl	1	Test Set	ID
CCS(=O)(=O)c1cccnc1S(=O)(=O)NC(=O)Nc1nc(OC)cc(OC)n1	0	Test Set	ID
COc1cc(OC)nc(NC(=O)NS(=O)(=O)c2ncccc2C(F)(F)F)n1	0	Test Set	ID
CCc1cnc(C2=NC(=O)C(C)(N2)C(C)C)c(c1)C(=O)O	0	Test Set	ID
COC(=O)c1ccccc1S(=O)(=O)NC(=O)Nc1nc(C)cc(C)n1	0	Test Set	ID
CSSC	1	Test Set	OD
CCO	0	Test Set	OD
O=Cc1occc1	1	Test Set	OD
ClC(=C(Cl)Cl)Cl	1	Test Set	OD
NC(=O)C(Br)(Br)C#N	1	Test Set	OD
CC1(C)COCN1	0	Test Set	OD
CNC(=S)S	1	Test Set	OD
ClCCCl	0	Test Set	OD
ClCCl	0	Test Set	OD
O=c1[nH][nH]c(=O)cc1	0	Test Set	OD
ClC1=C(Cl)C(Cl)(Cl)C(=C1Cl)Cl	1	Test Set	OD
CC(C)CCCCCCCCCCCCCCCOCCOCCO	1	Test Set	OD
CCCCOCCCC	0	Test Set	OD
FC(F)(F)Oc1ccc(NC(=O)NN=C(Cc2ccc(cc2)C#N)c2cccc(c2)C(F)(F)F)cc1	1	Test Set	OD
CCCCSP(=O)(SCCCC)SCCCC	1	Test Set	OD
ClC1C2OC2C2C1[C@]1(Cl)C(=C(Cl)C2(Cl)C1(Cl)Cl)Cl	1	Test Set	OD
CCN(CC)C(=O)C(C)Oc1cccc2ccccc12	0	Test Set	OD
ClC1C(Cl)C(Cl)C(Cl)C(Cl)C1Cl	1	Test Set	OD
CCOC(=O)C1CC(=C(C(=O)C2CC2)C(=O)C1)O	1	Test Set	OD
CCSC(=O)N1CCCCCC1	1	Test Set	OD
CNC(=O)Oc1cccc2CC(C)(C)Oc12	1	Test Set	OD
CC(=CC1C(C(=O)OCc2coc(Cc3ccccc3)c2)C1(C)C)C	1	Test Set	OD
CCOC(=O)OC1=C(C(=O)NC21CCC(CC2)OC)c1cc(C)ccc1C	1	Test Set	OD
CC1(C)C(C(=O)OC(C#N)c2cccc(Oc3ccccc3)c2)C1(C)C	1	Test Set	OD
CON=C(C(=O)OC)c1ccccc1CON=C(C)c1cccc(c1)C(F)(F)F	1	Test Set	OD
Cc1c(Cl)c(=O)n(c(=O)[nH]1)C(C)(C)C	0	Test Set	OD
